# Supplementary material for: Bacillus subtilis RNase Y Activity In Vivo Analysed by Tiling Microarrays
Source: PubMed Central journal article supplement (PMC3542257; doi:10.1371/journal.pone.0054062), 2013-01-10
Supplement: pone.0054062.s001.pdf [file pone.0054062.s001.pdf]

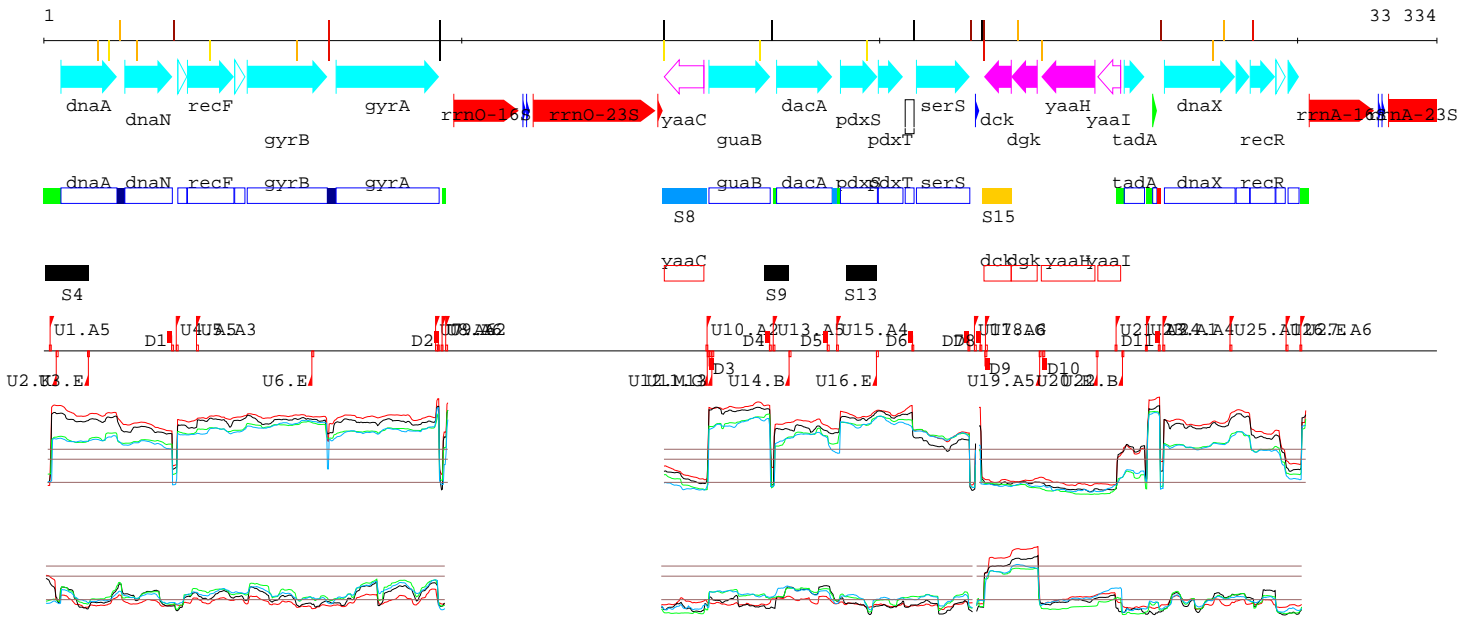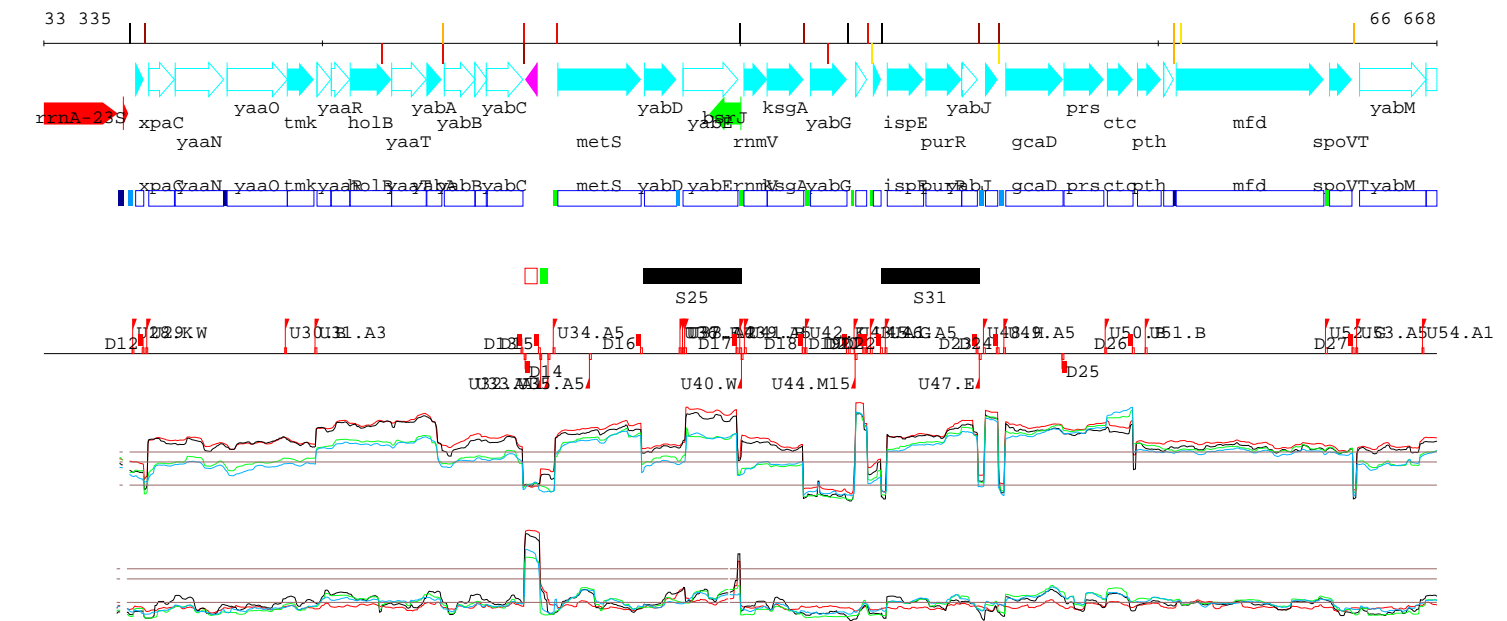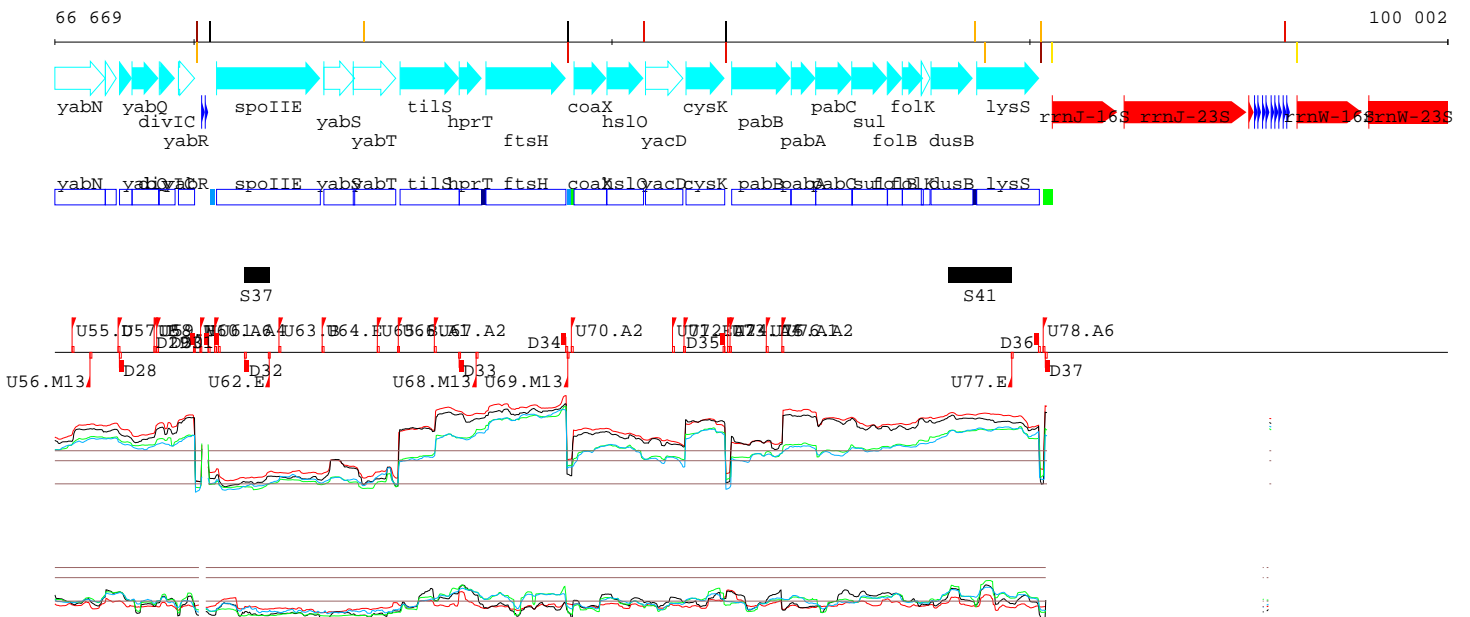

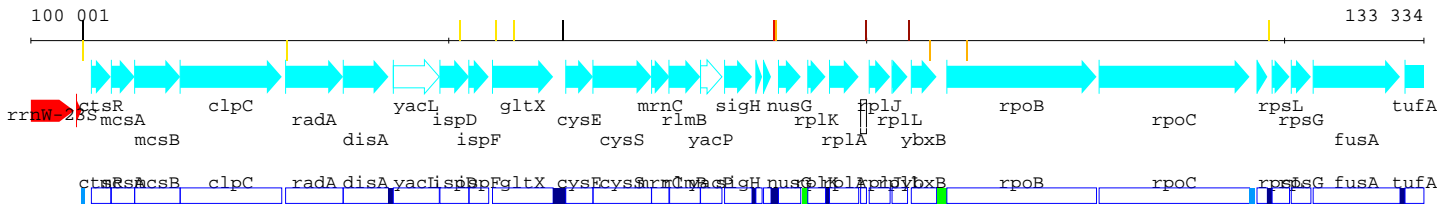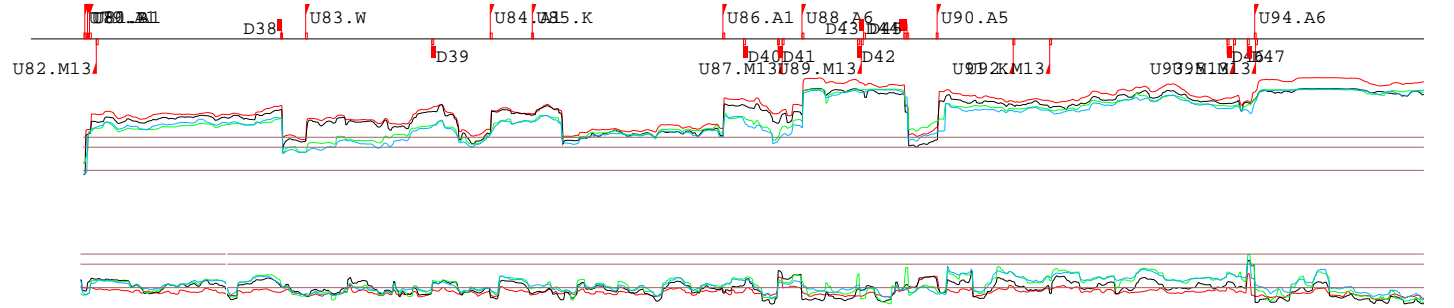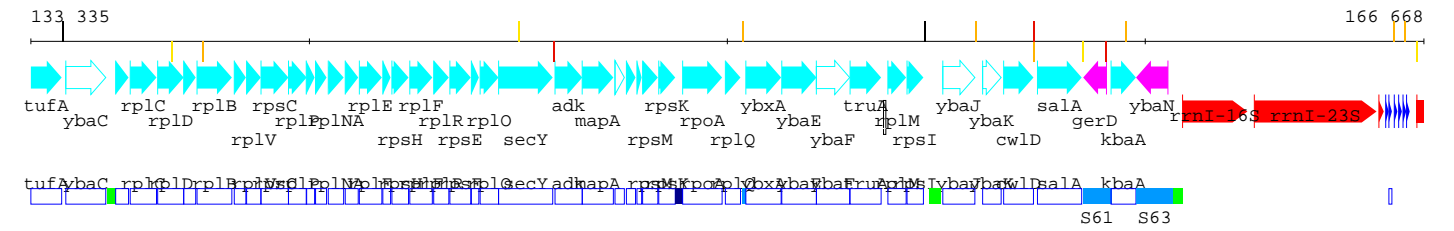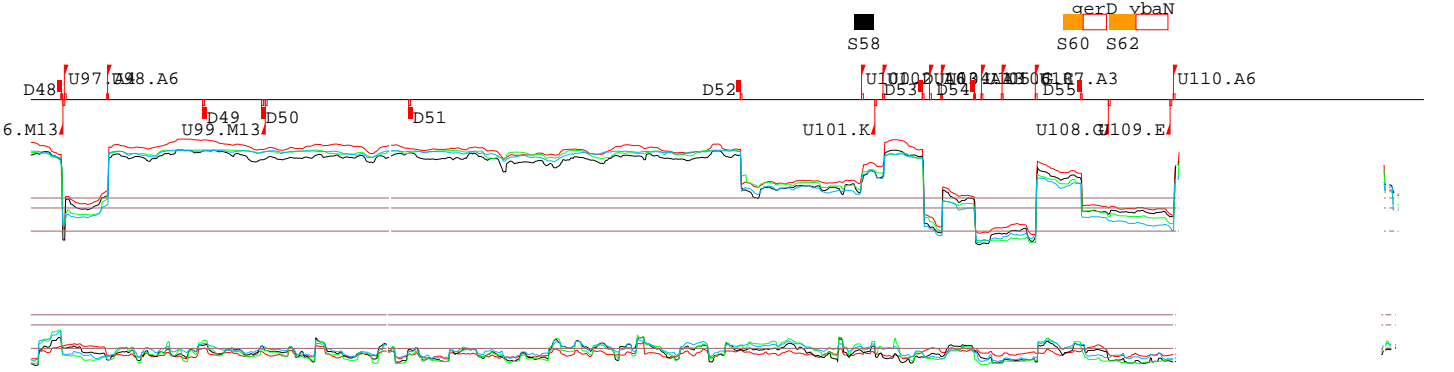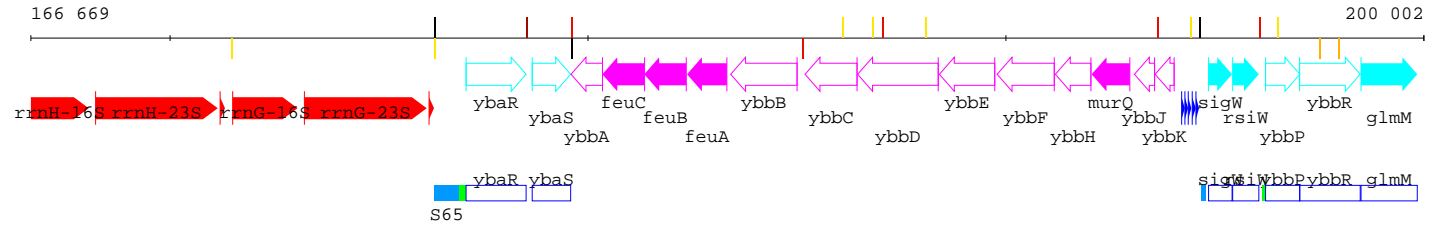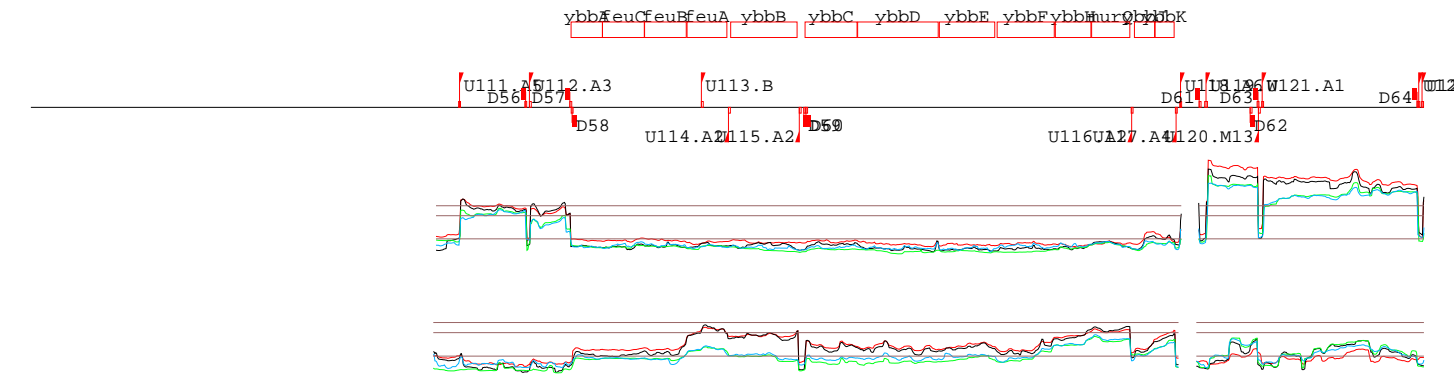

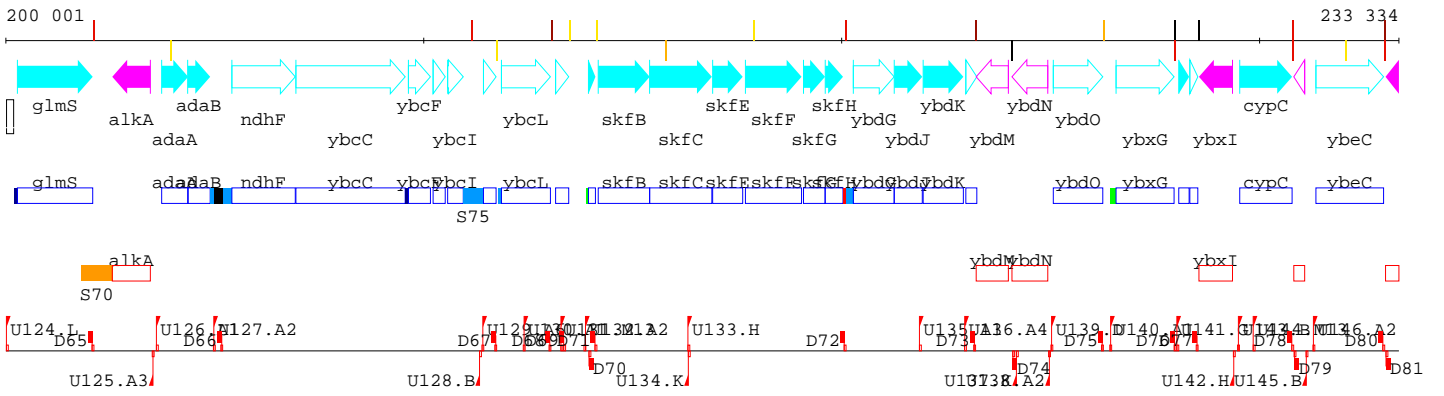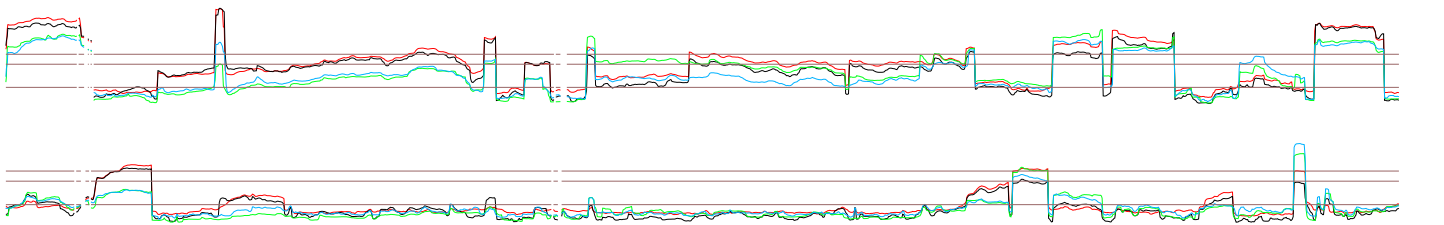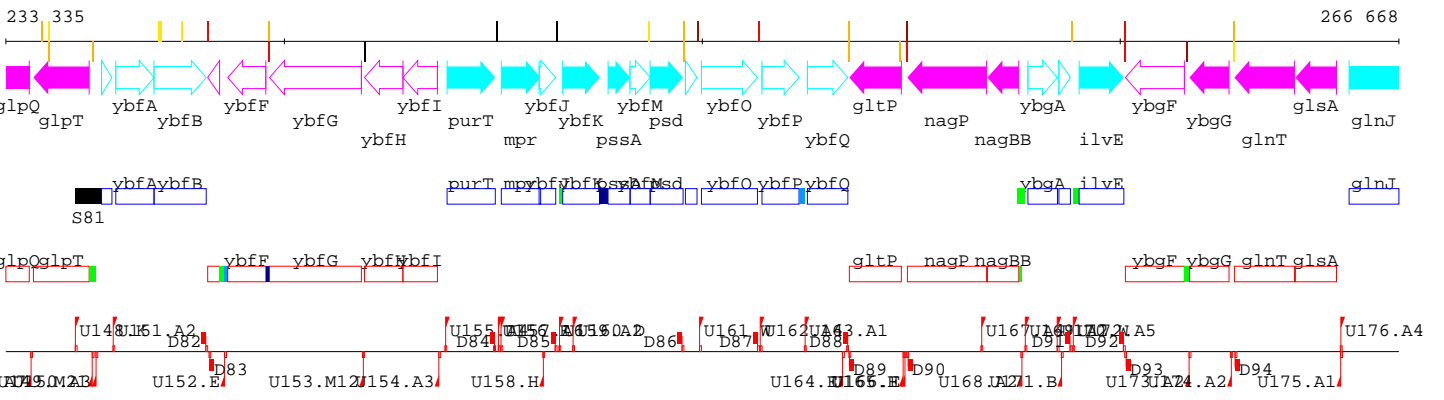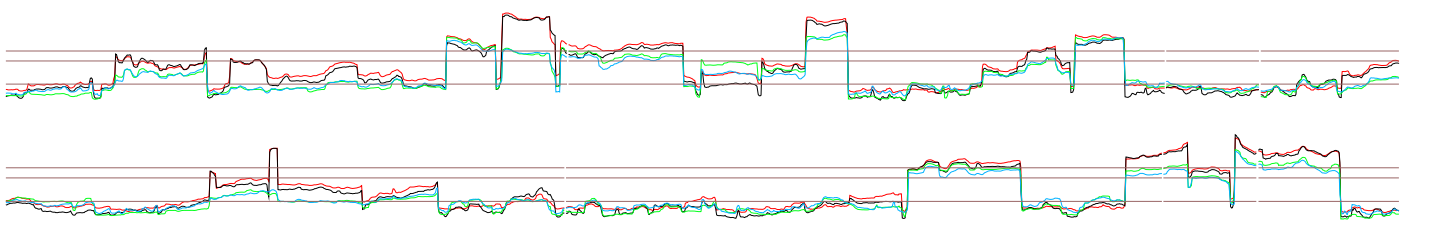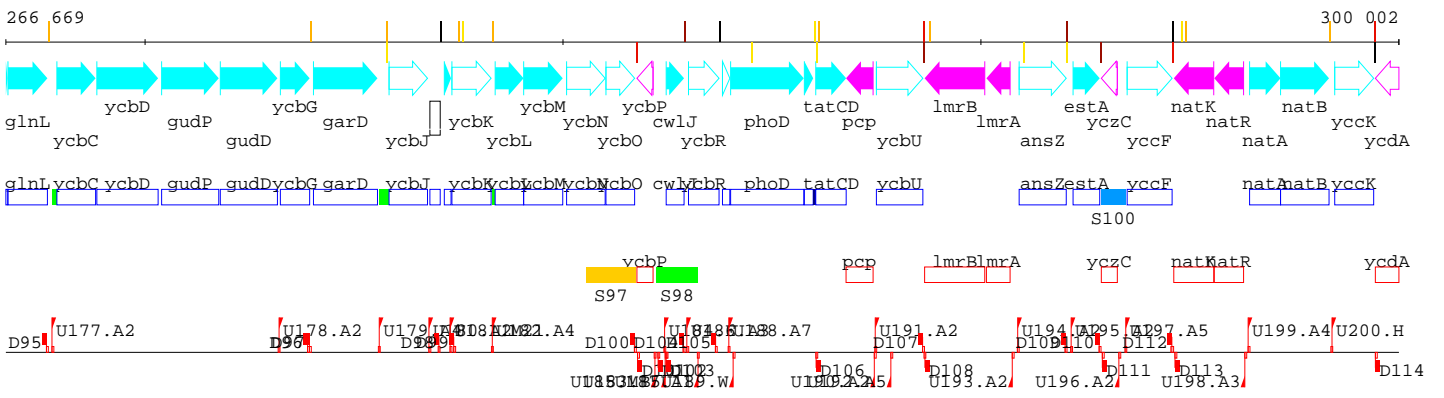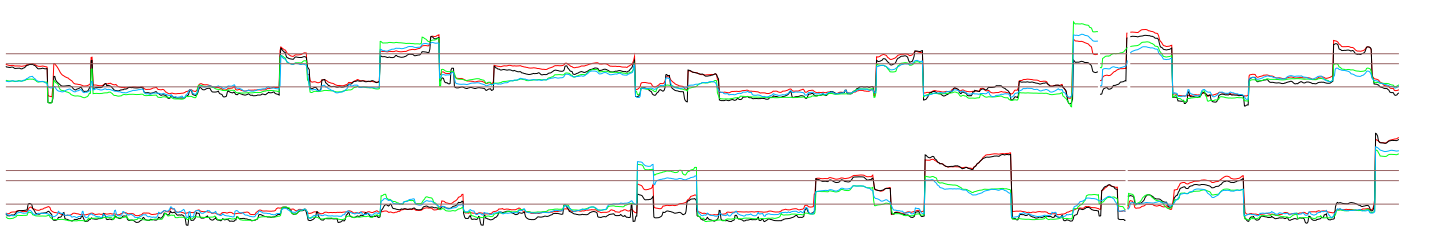

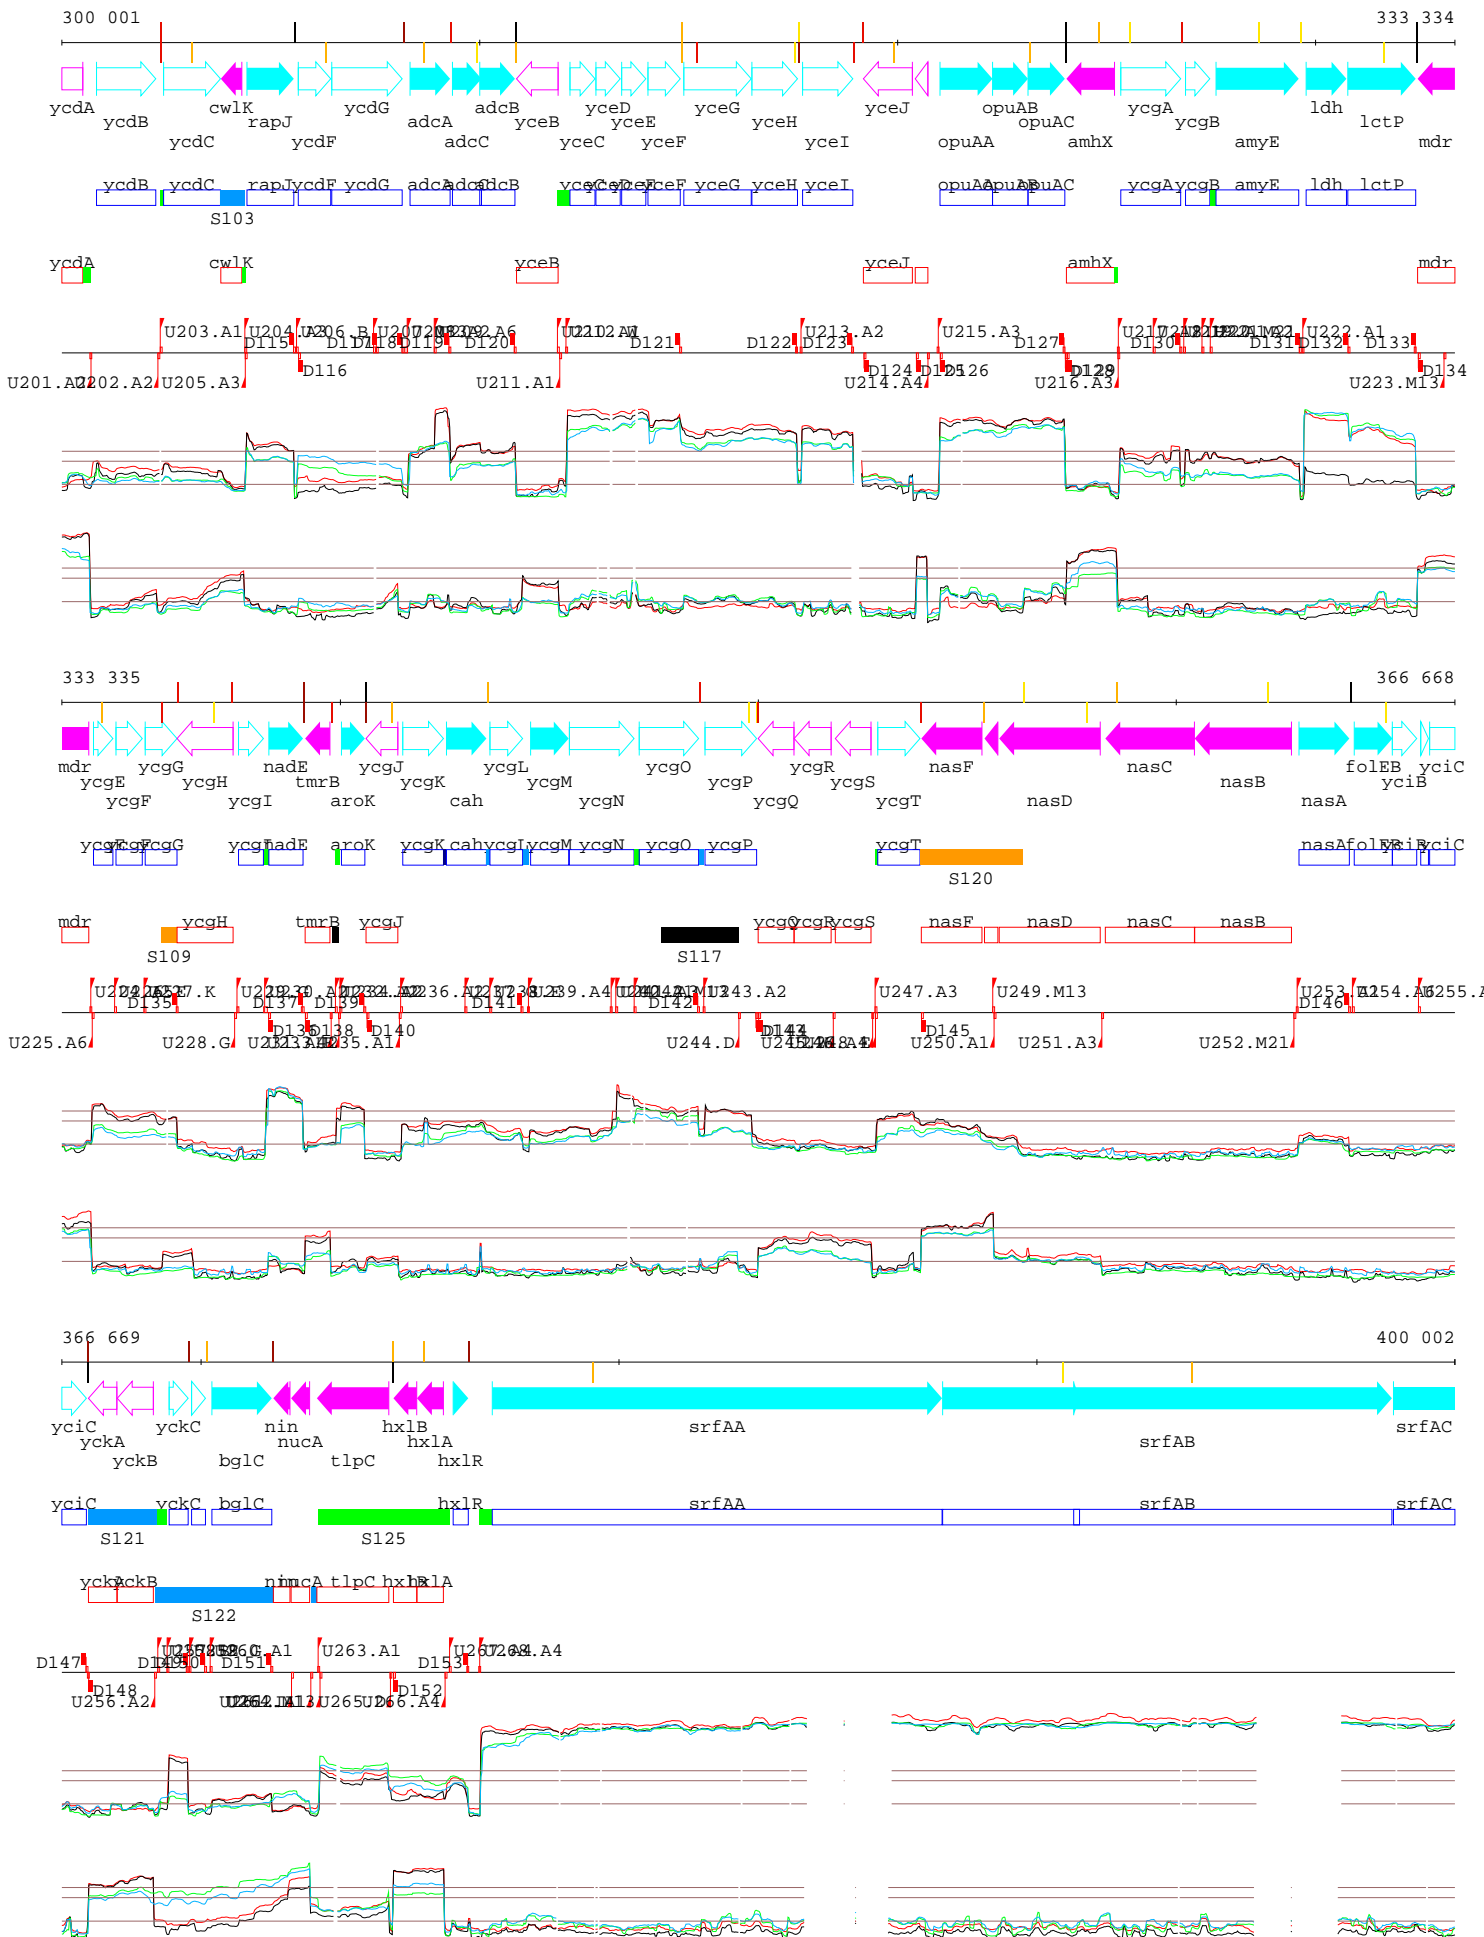







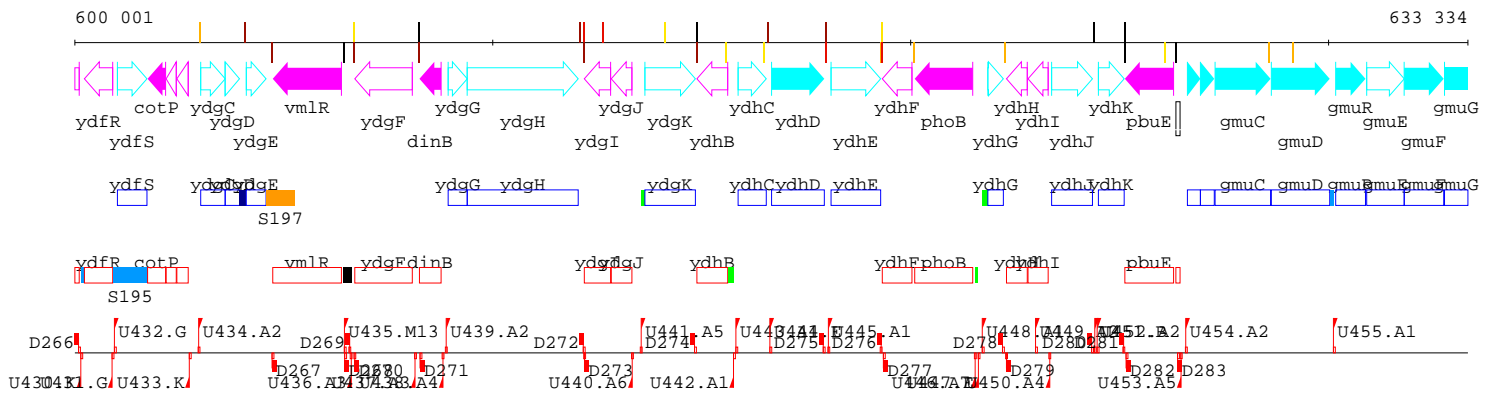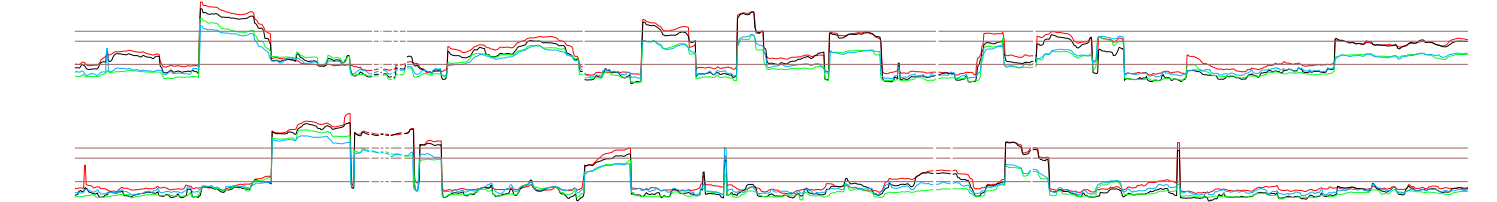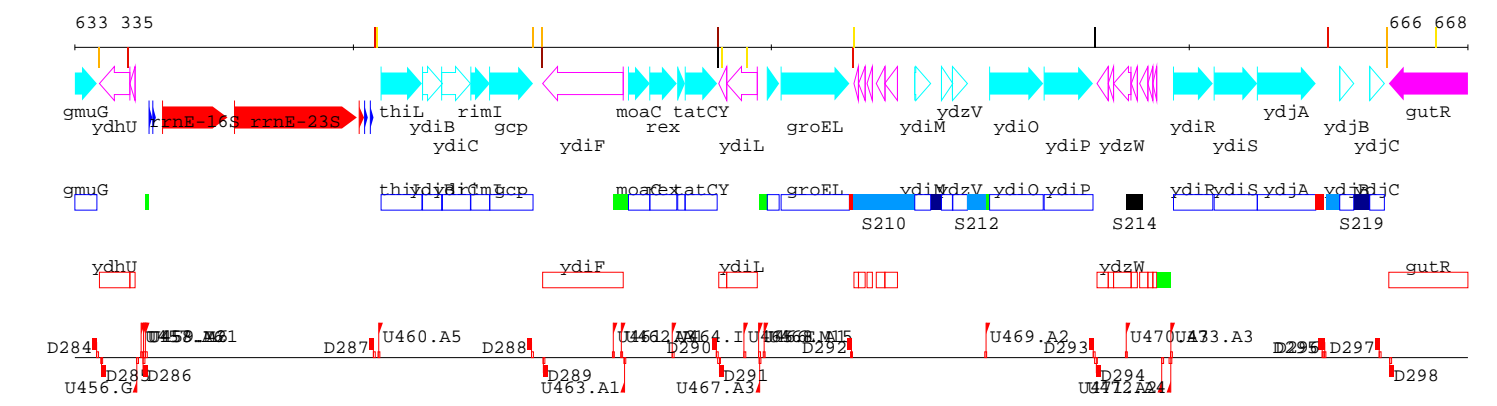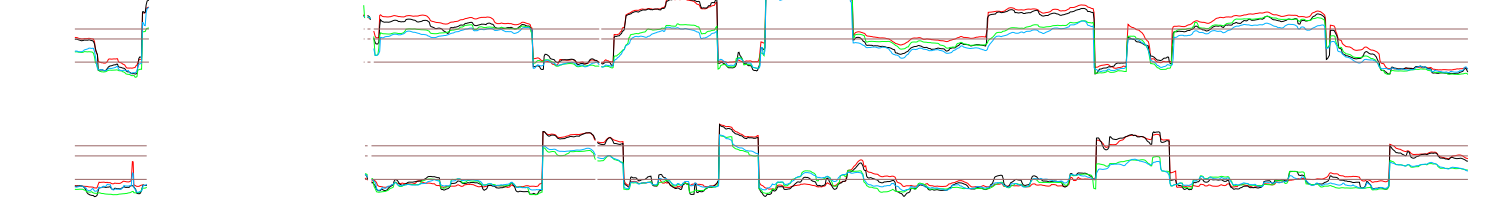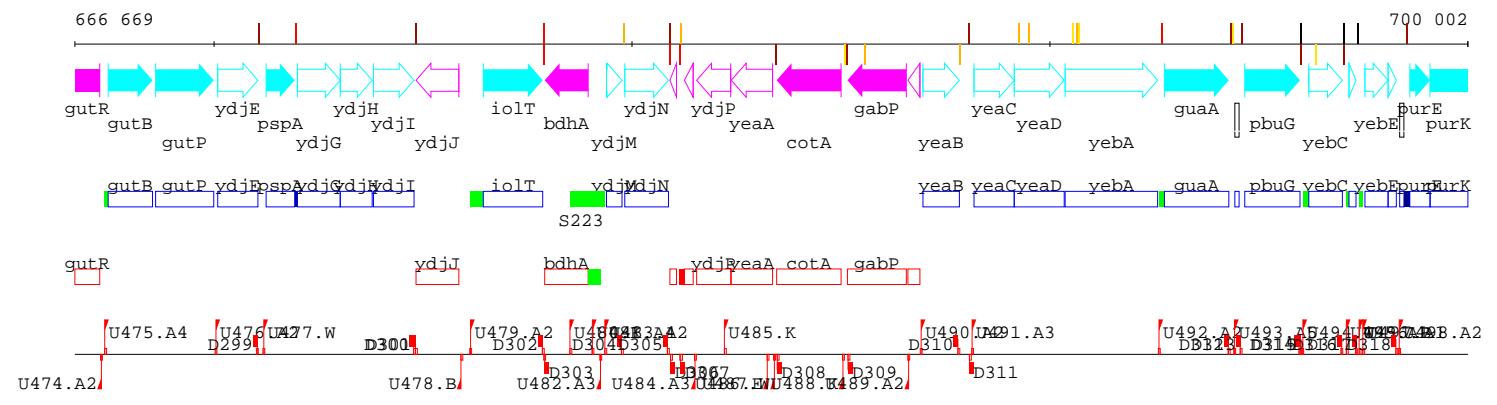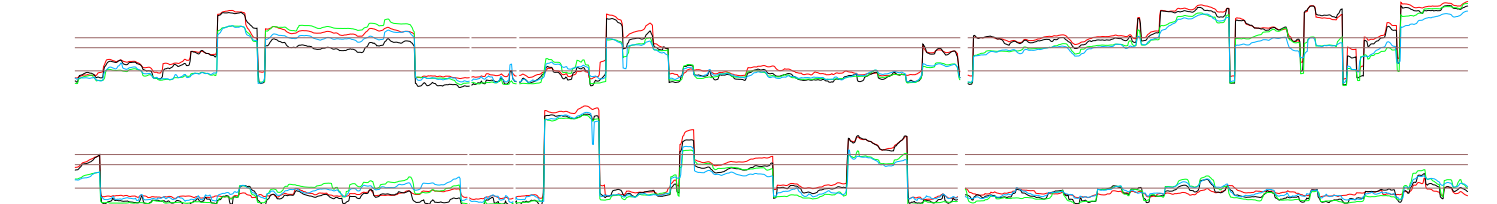

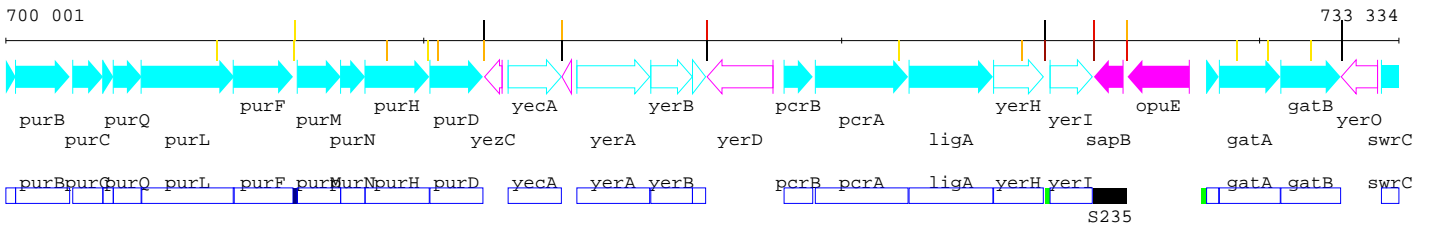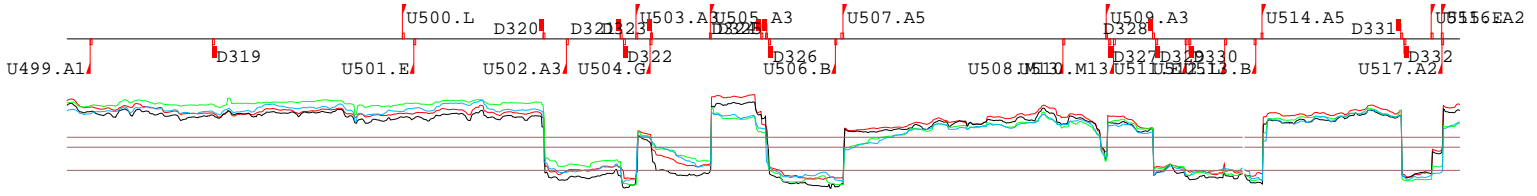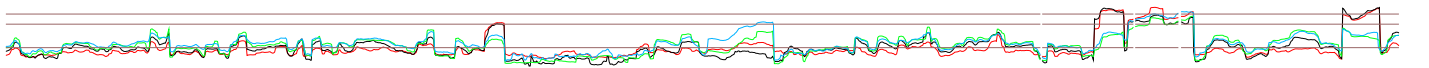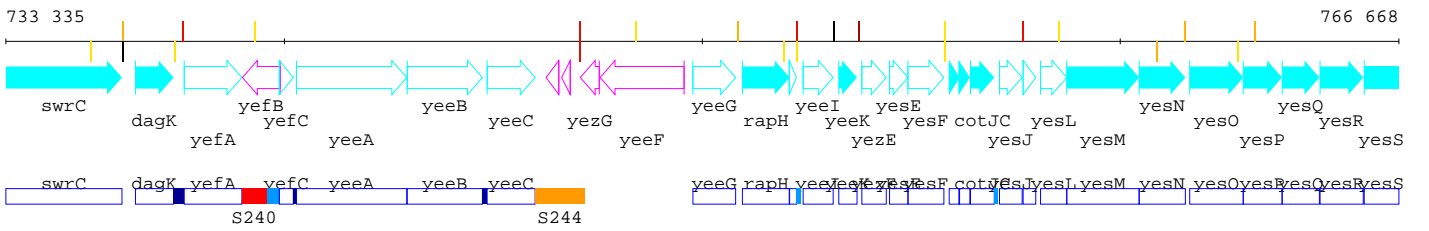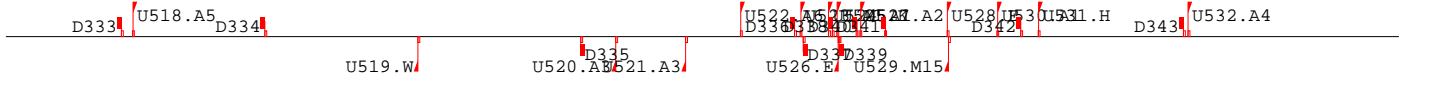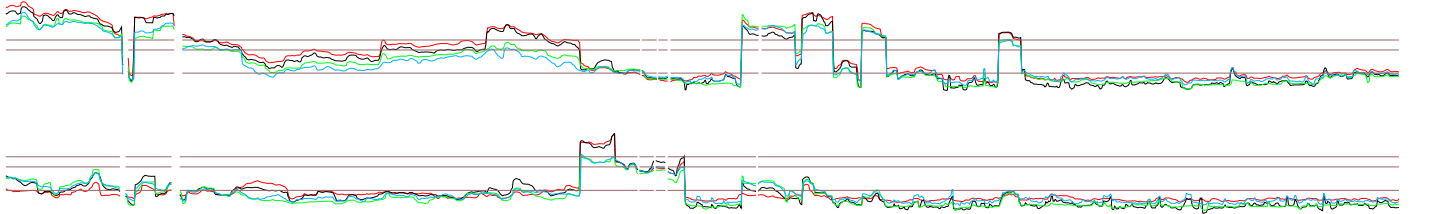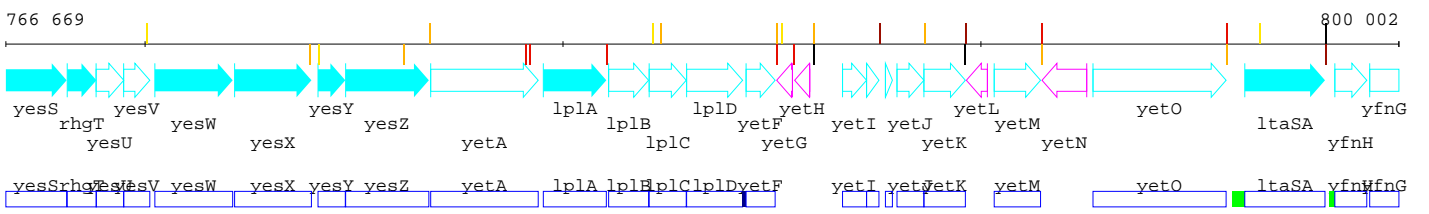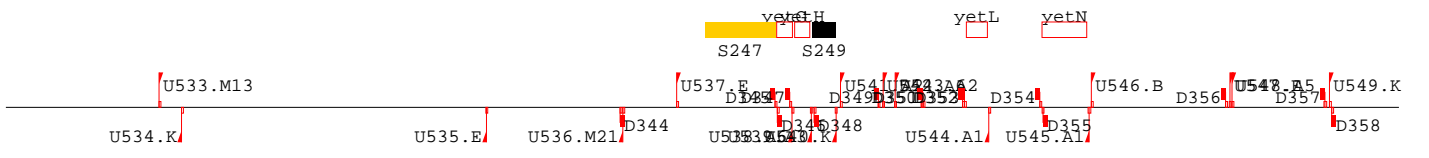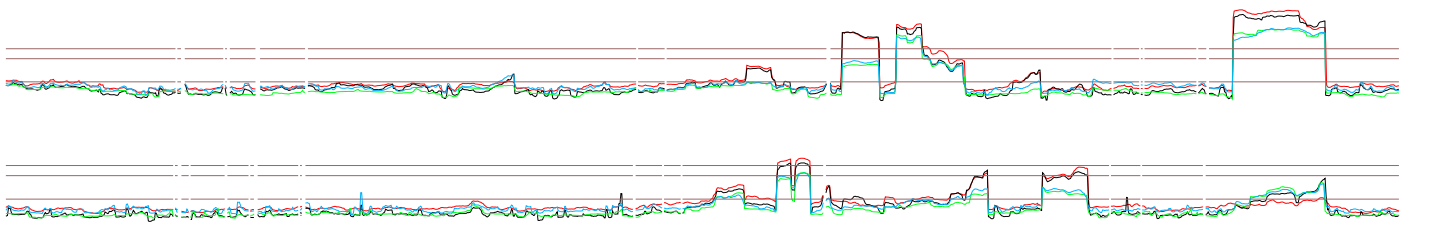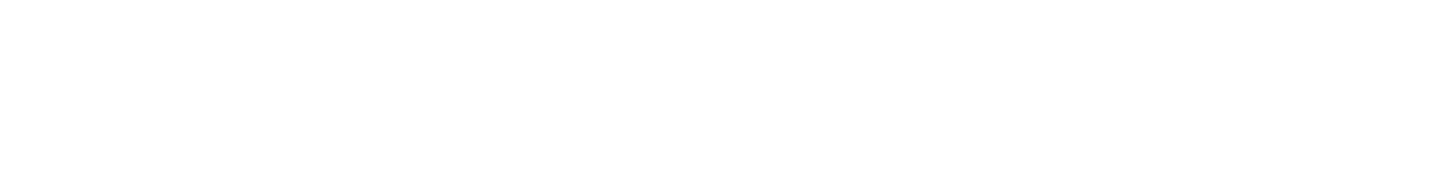



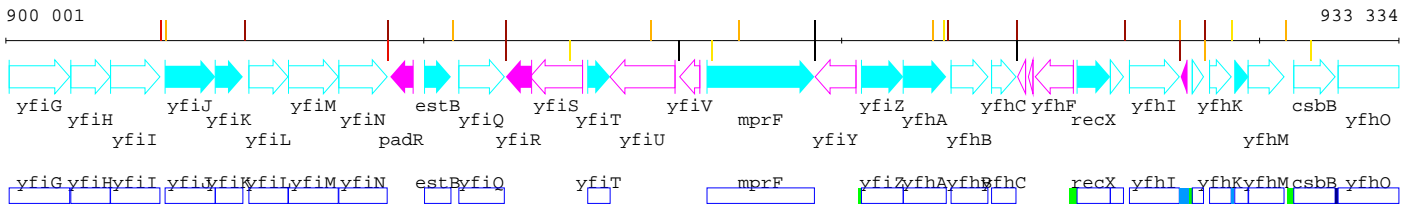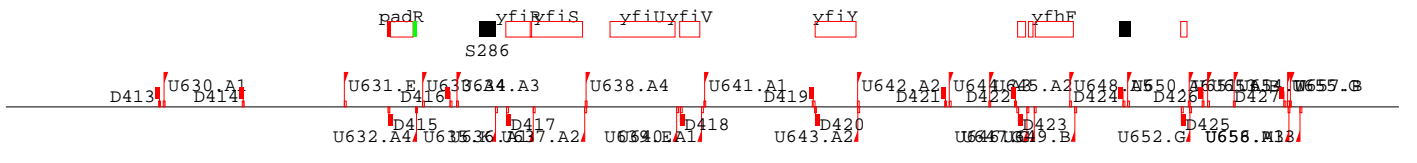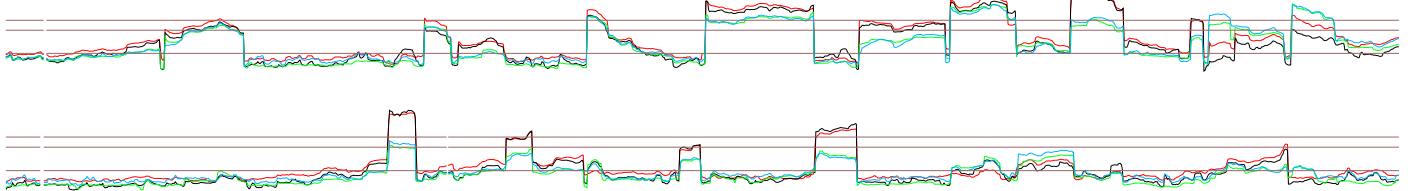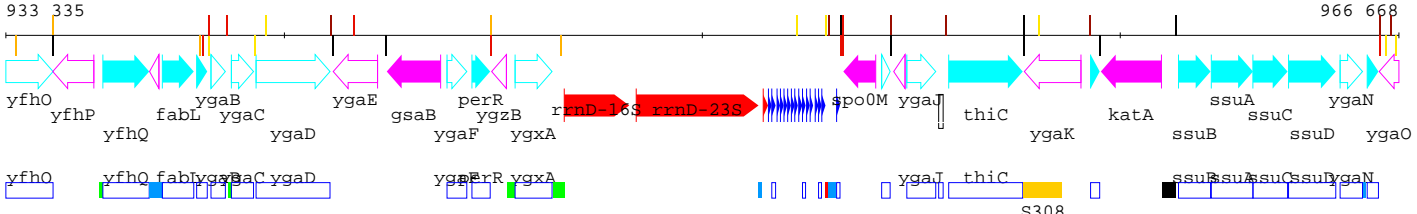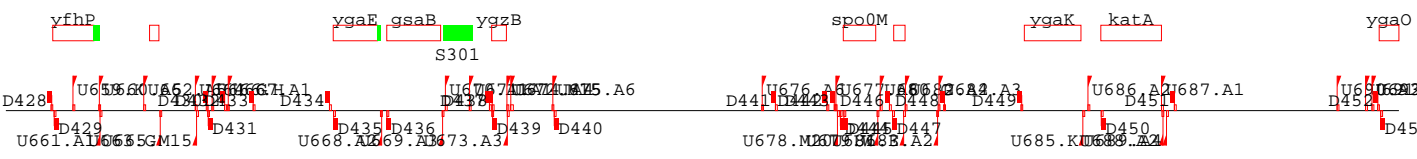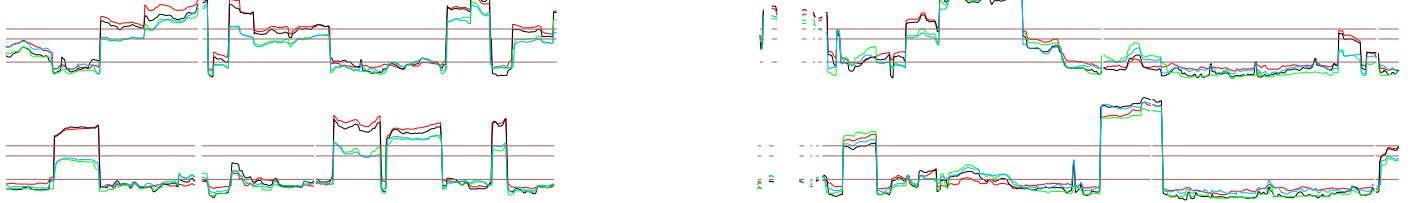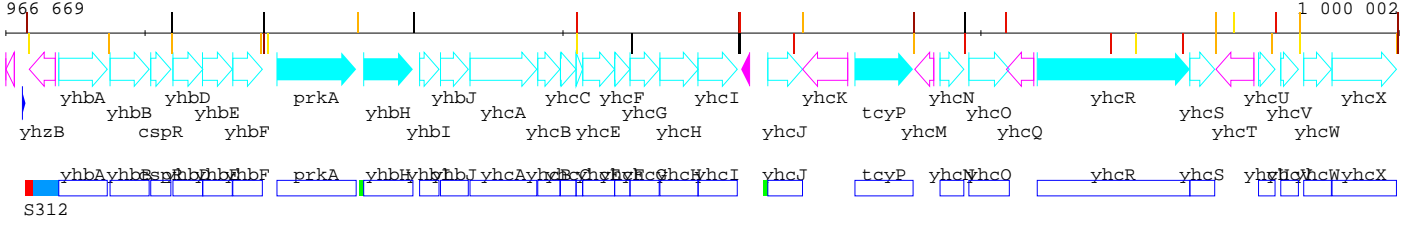

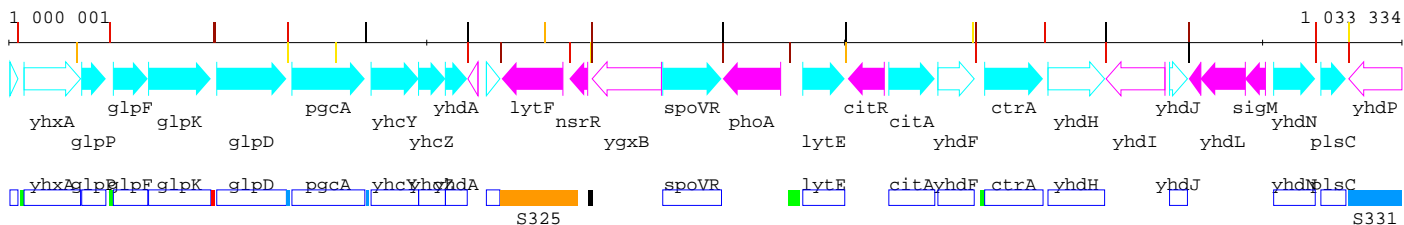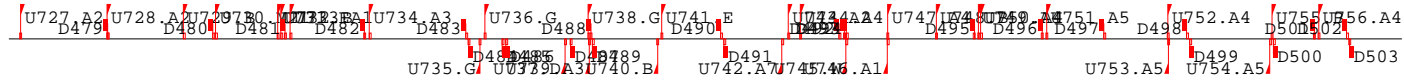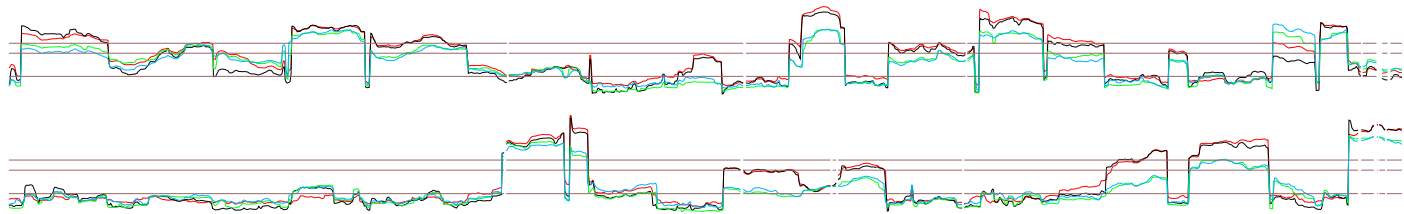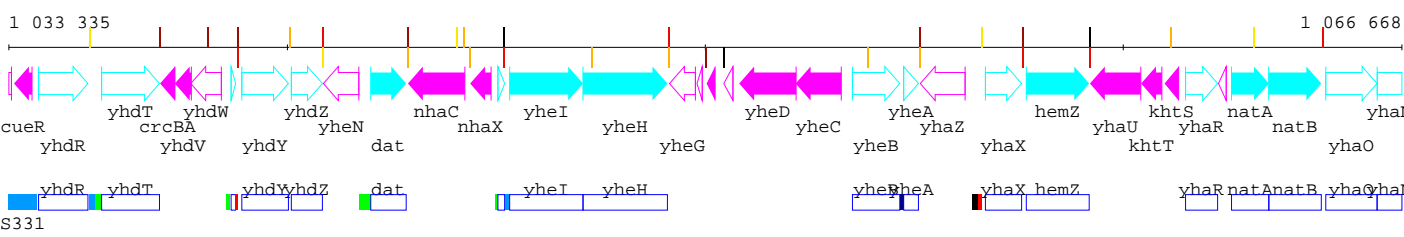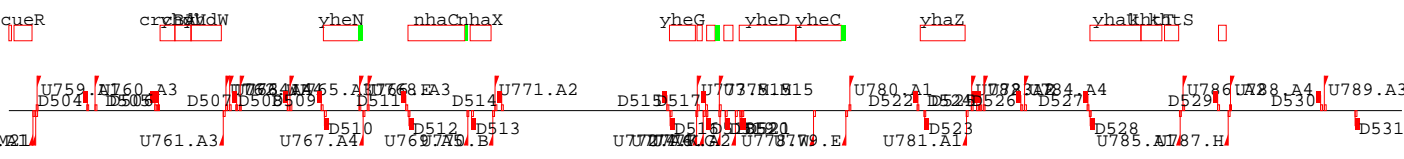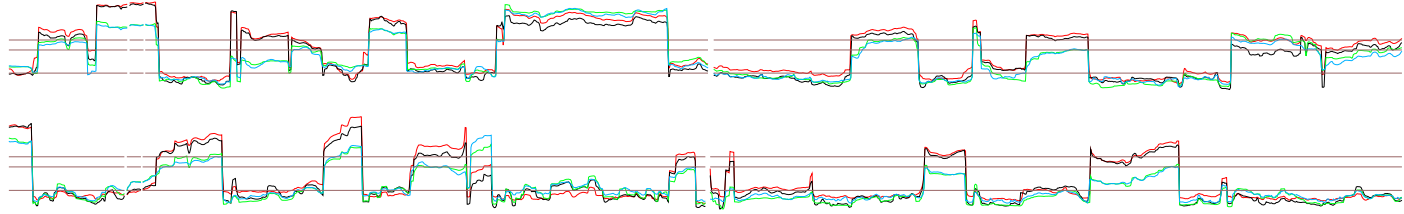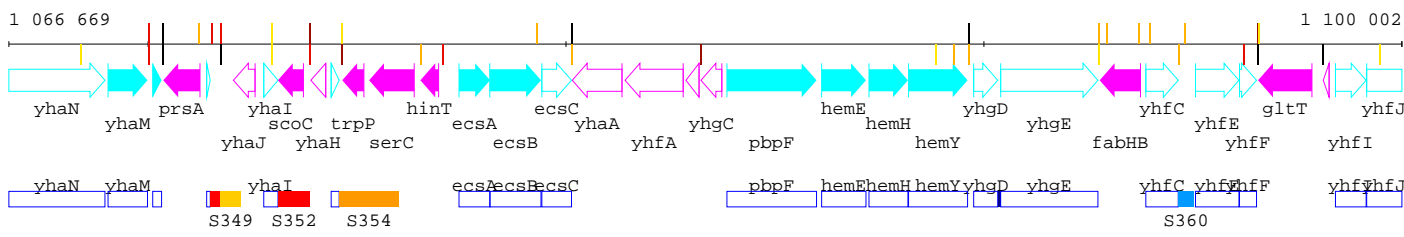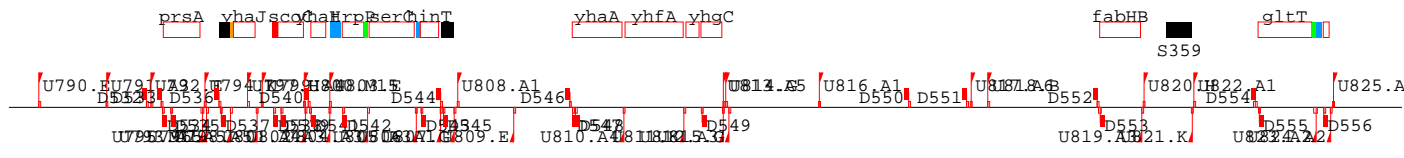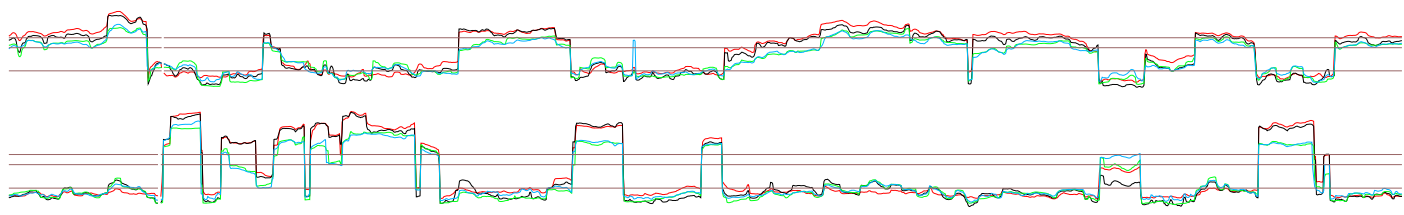



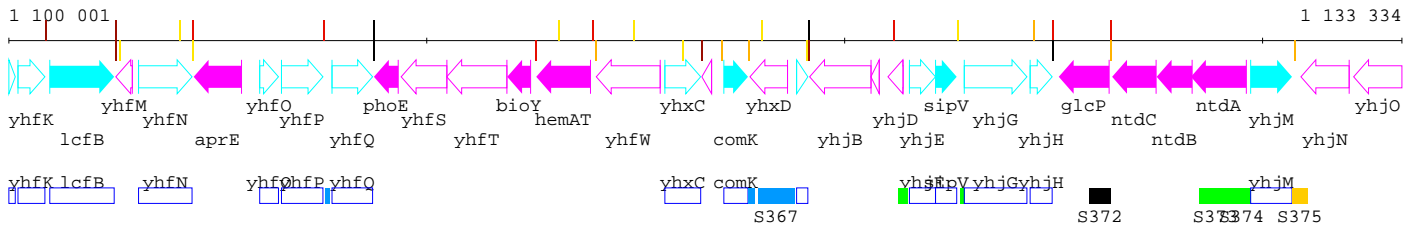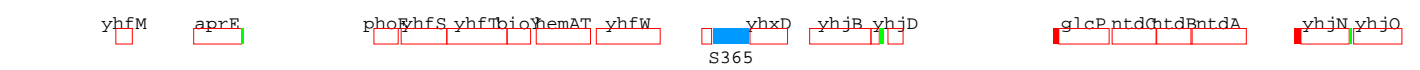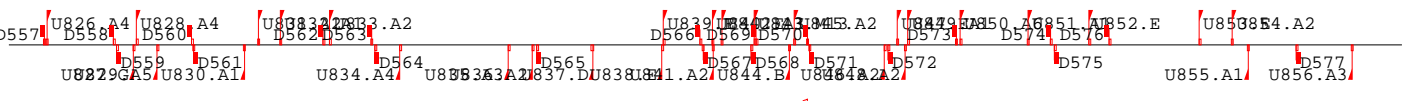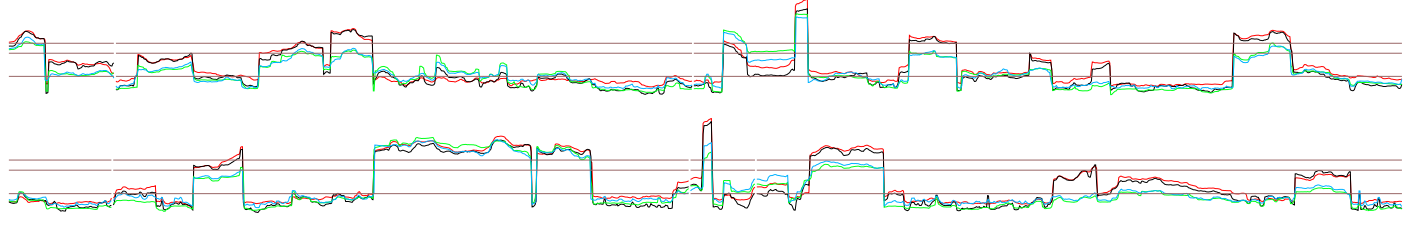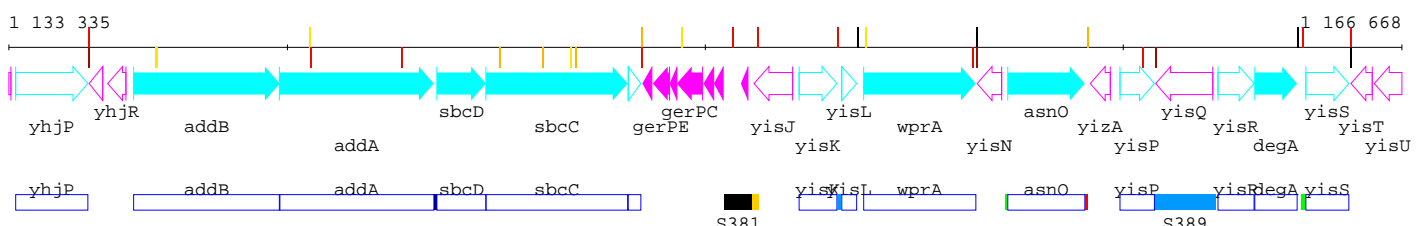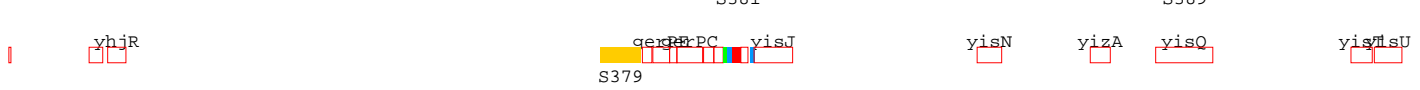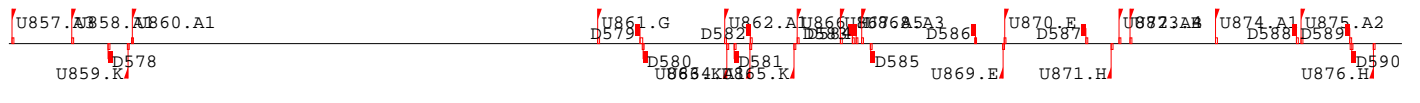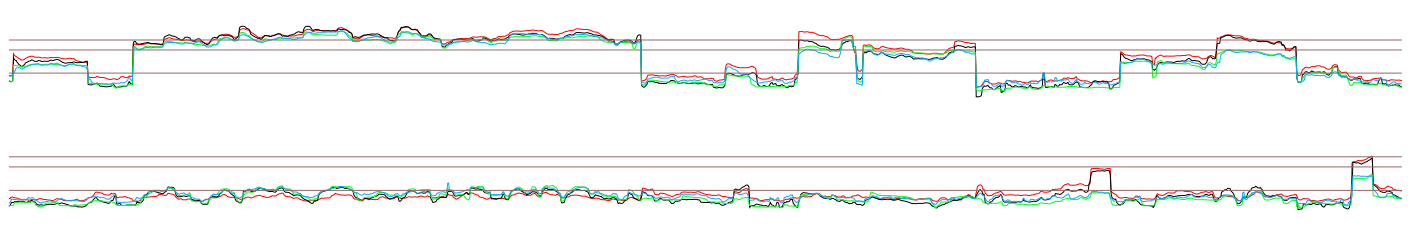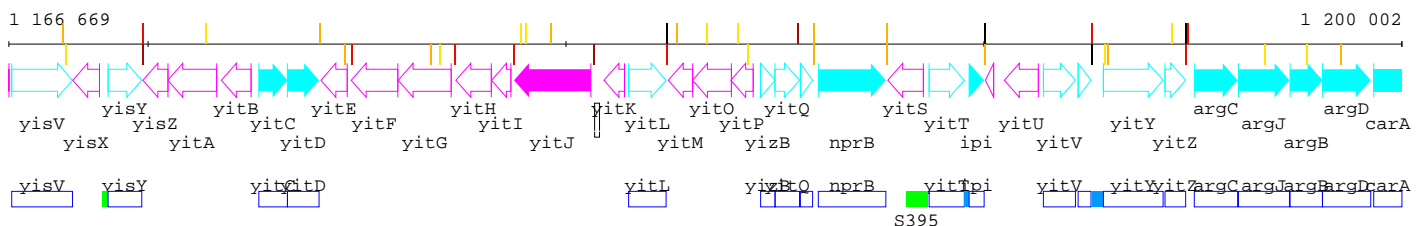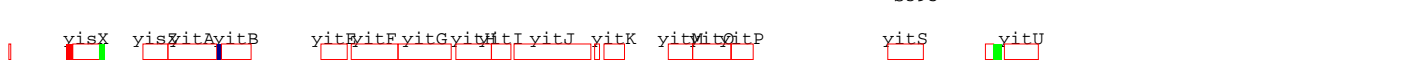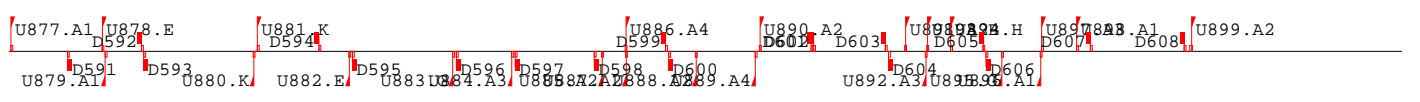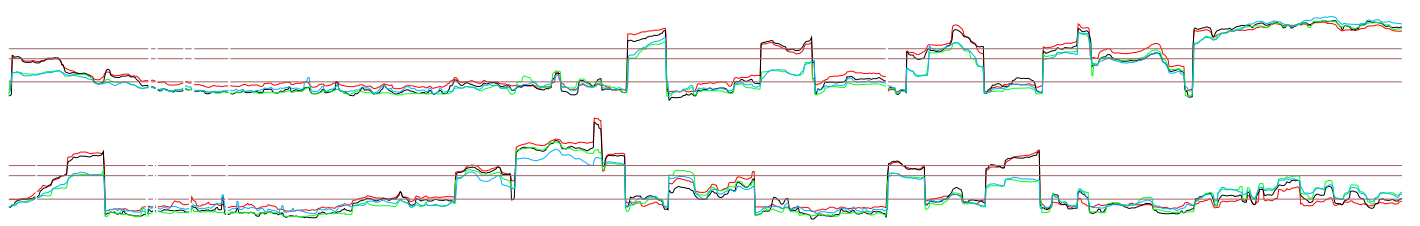



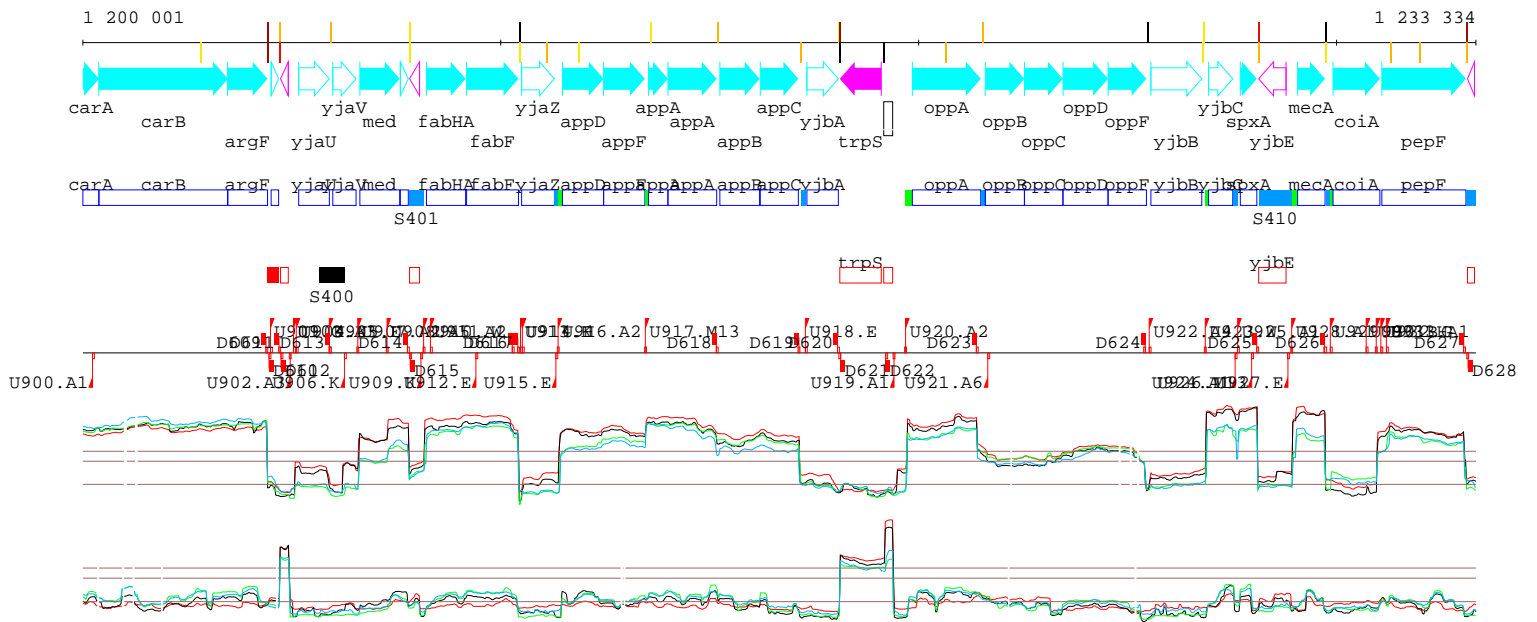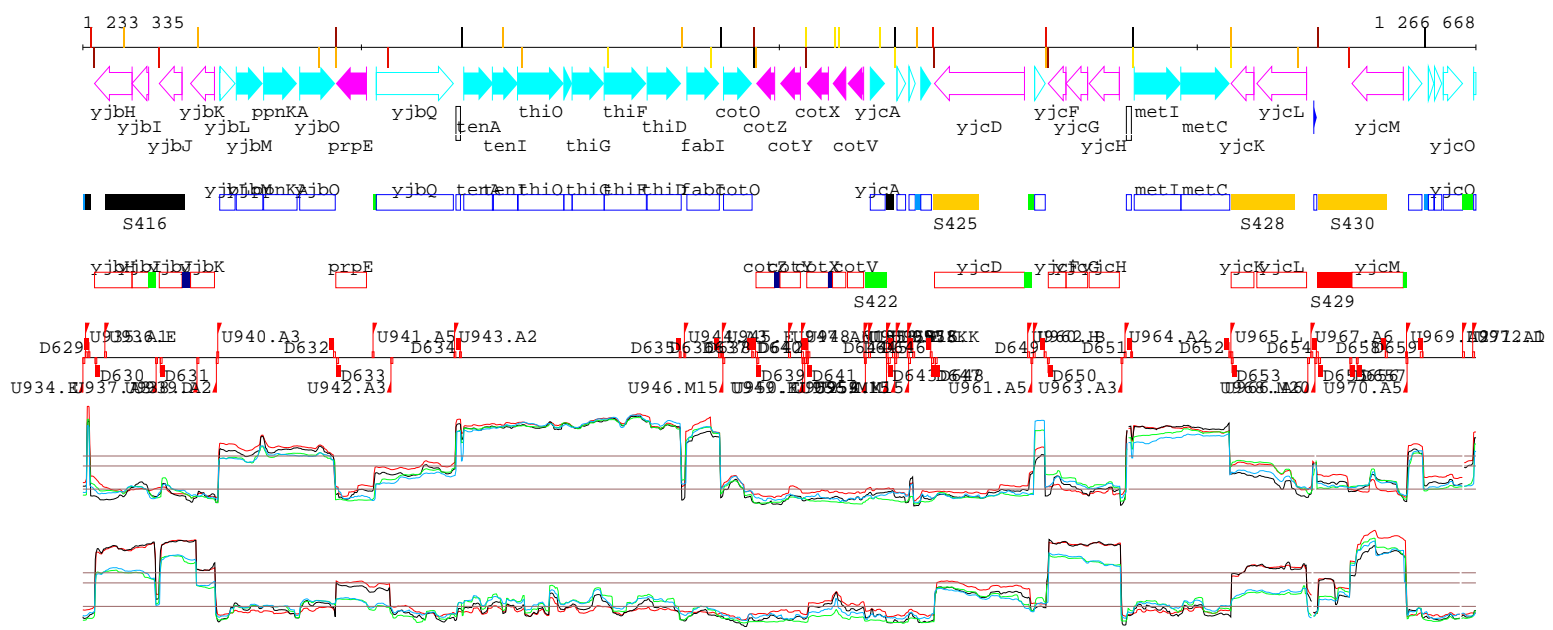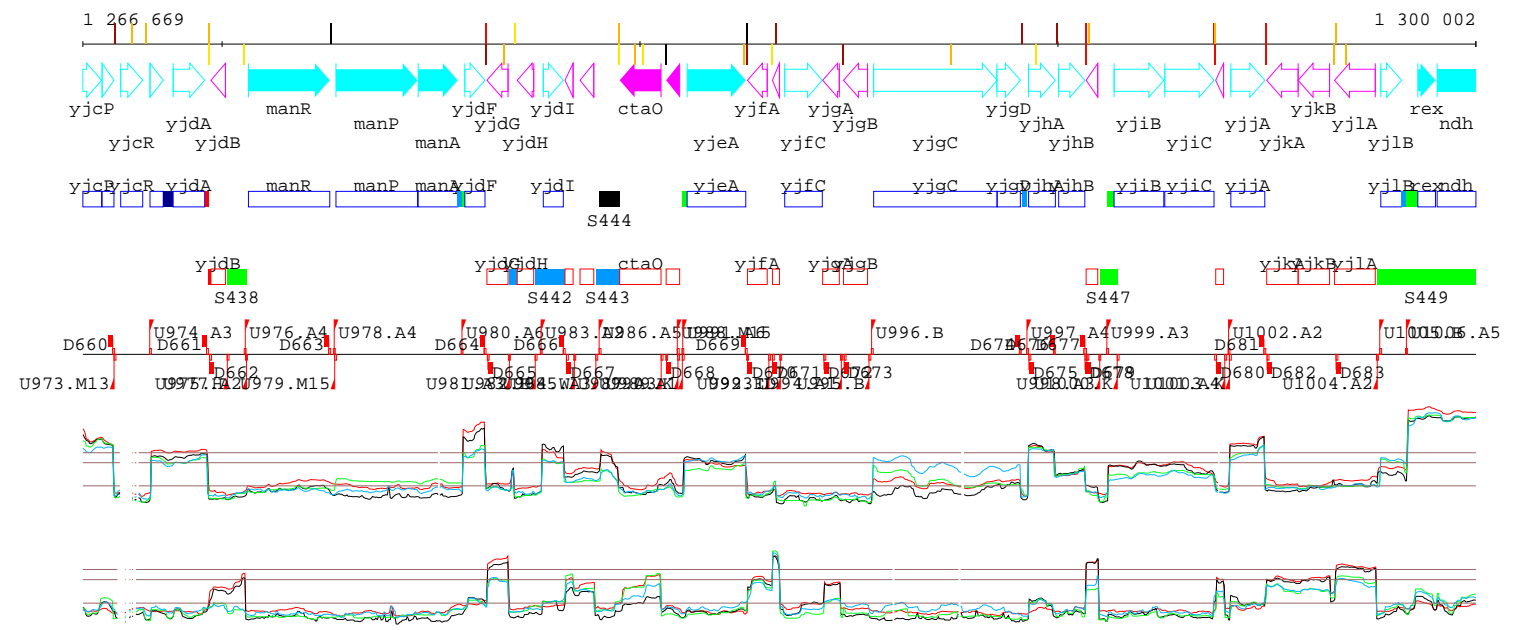

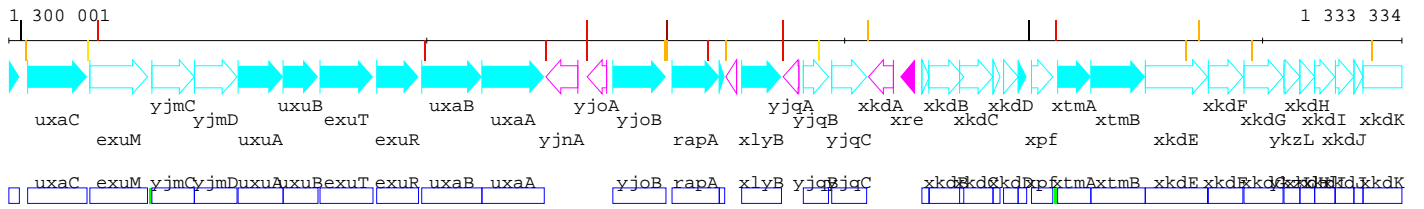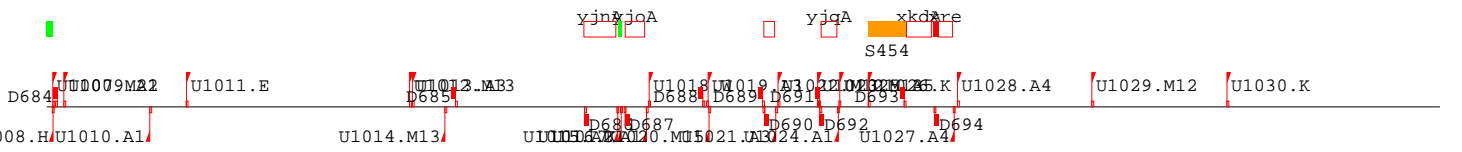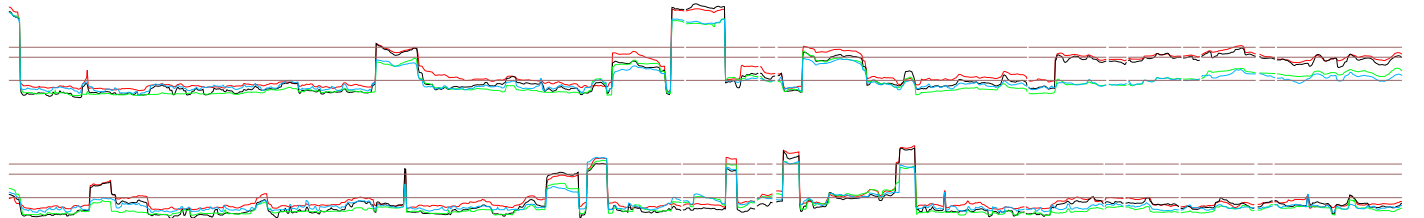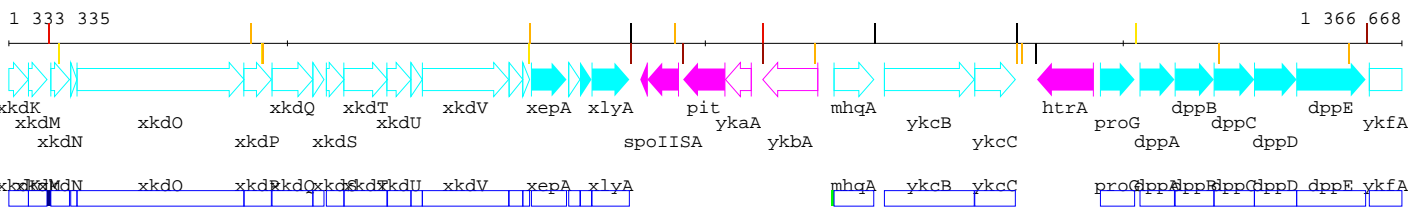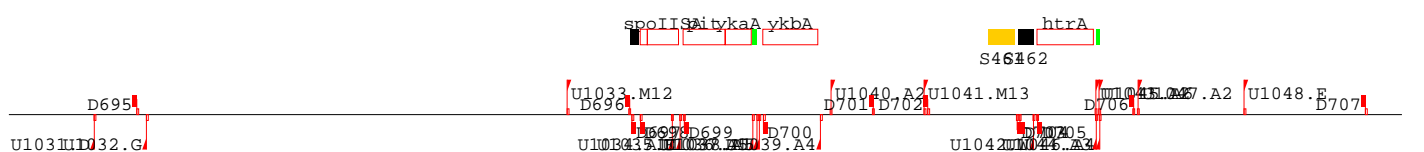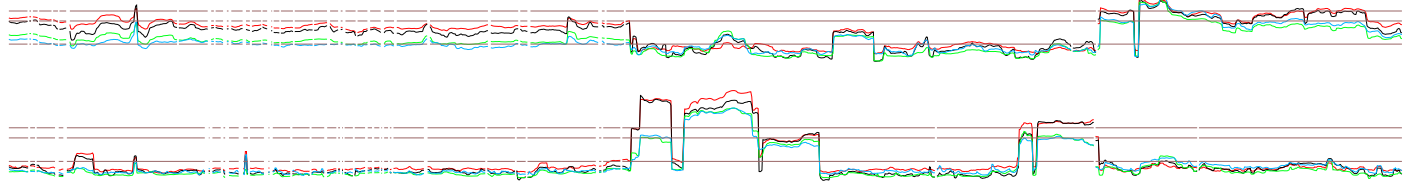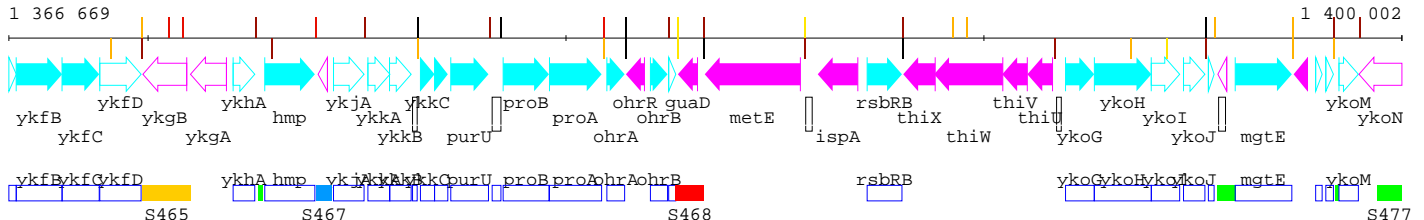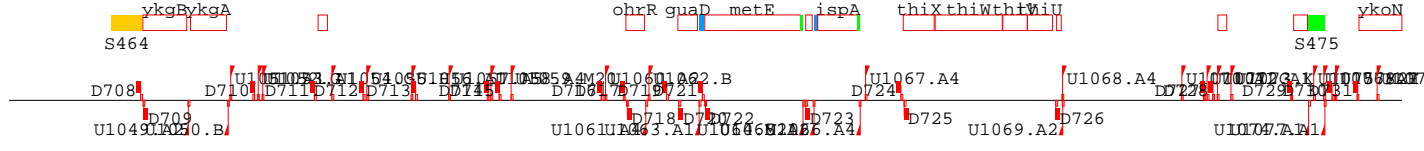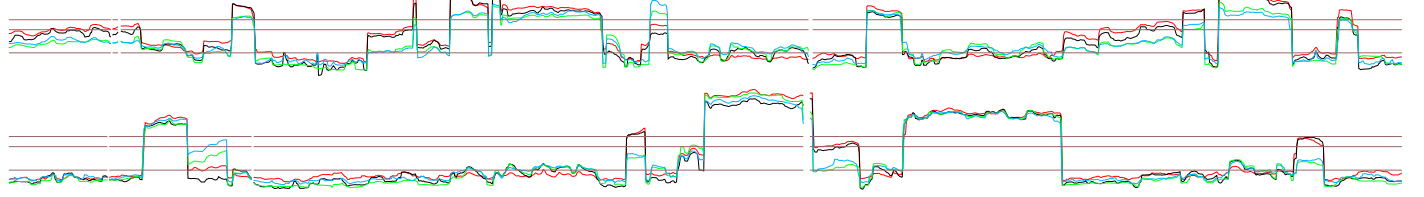

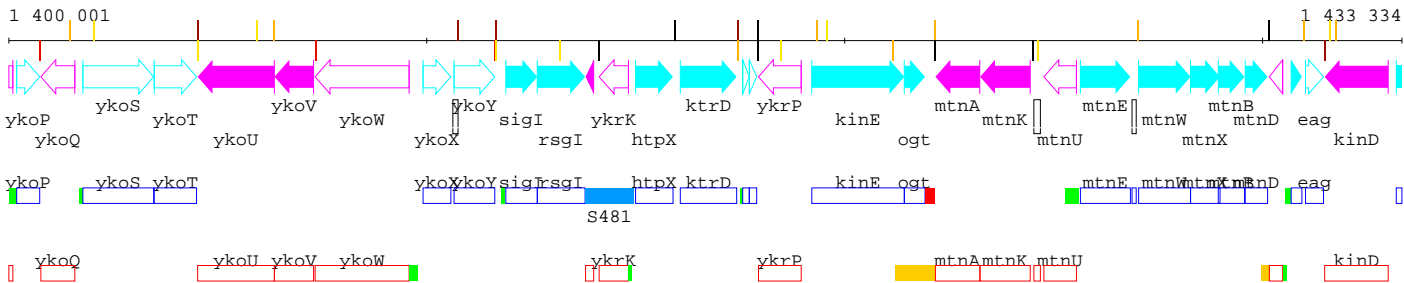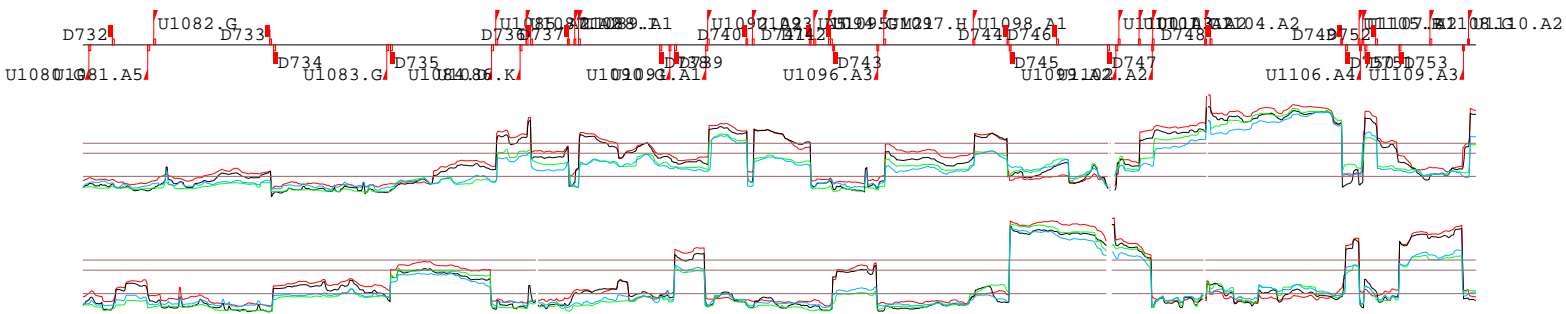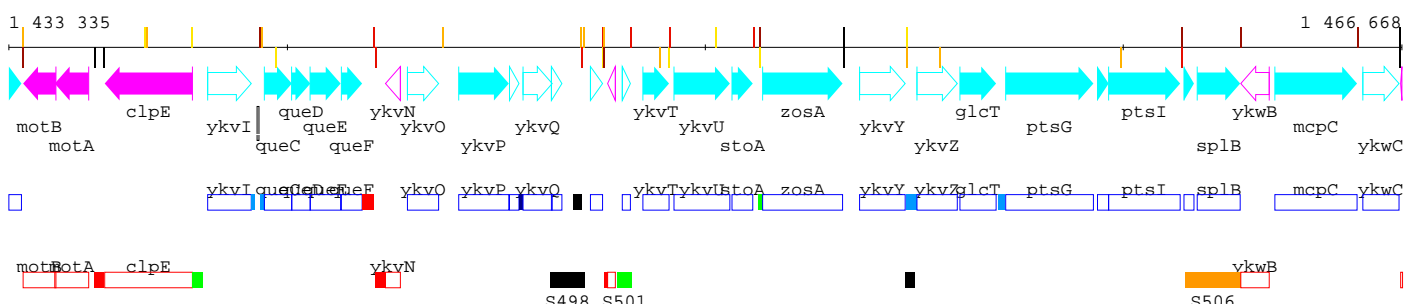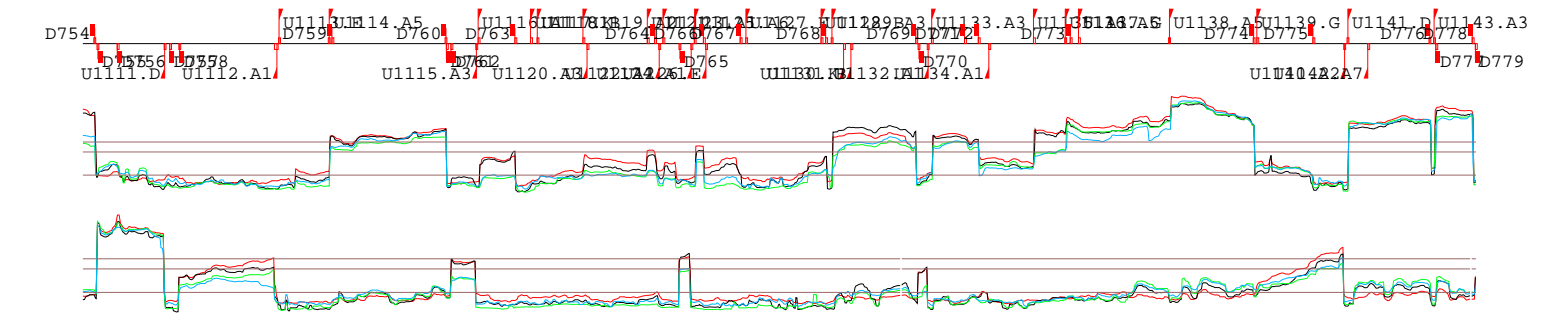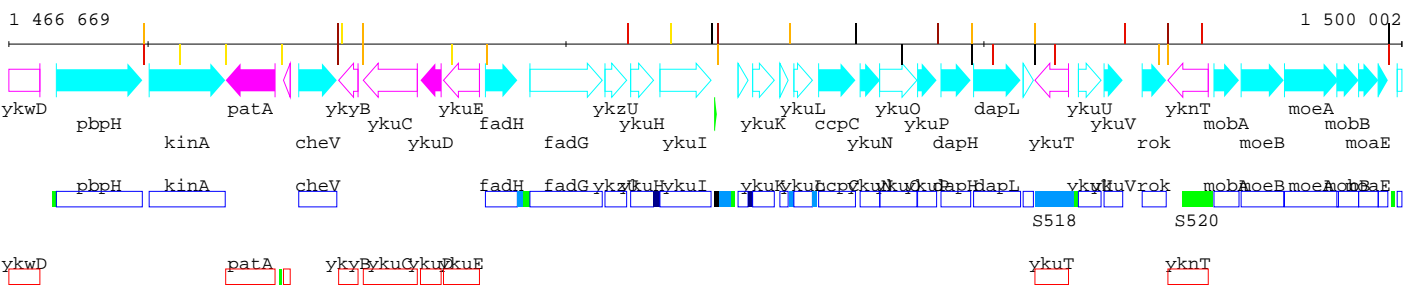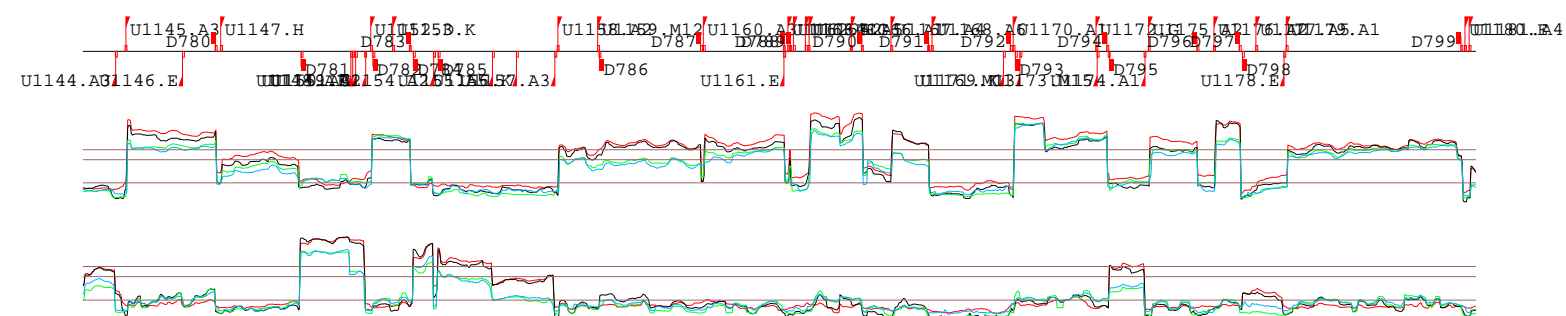

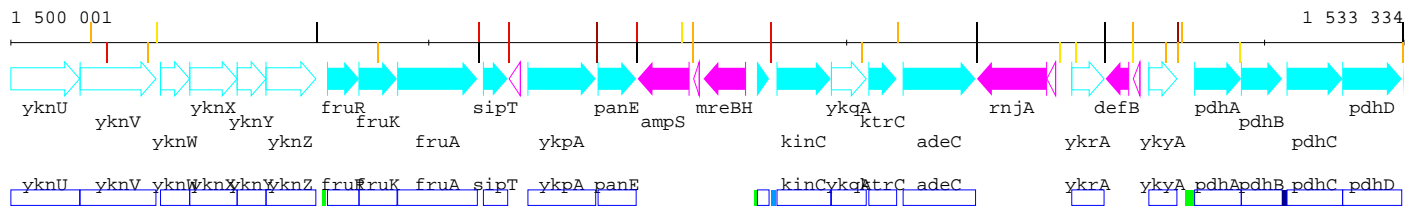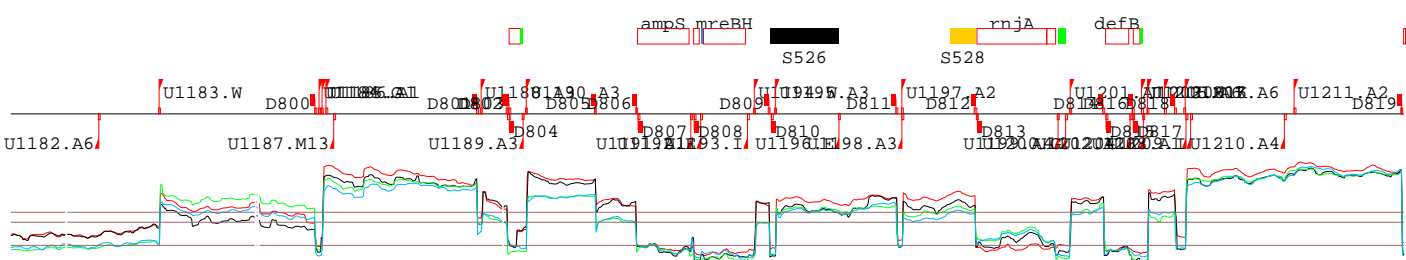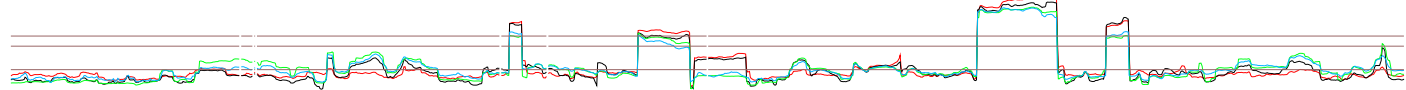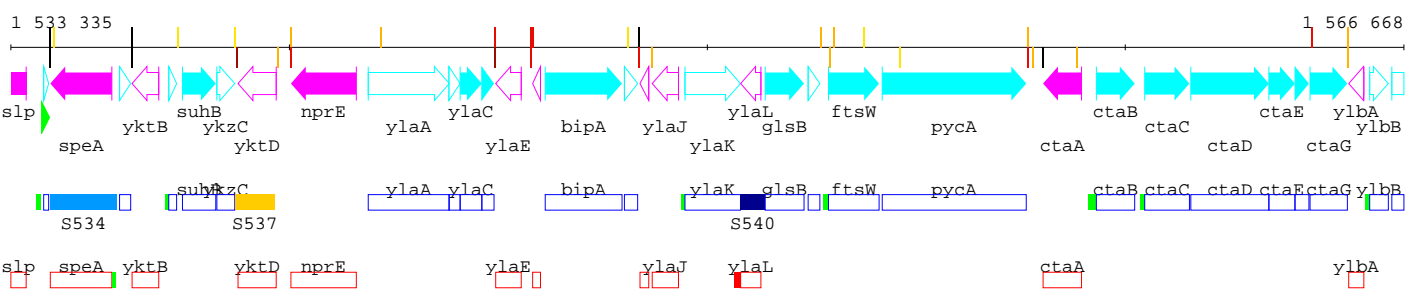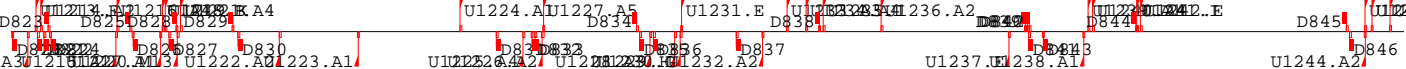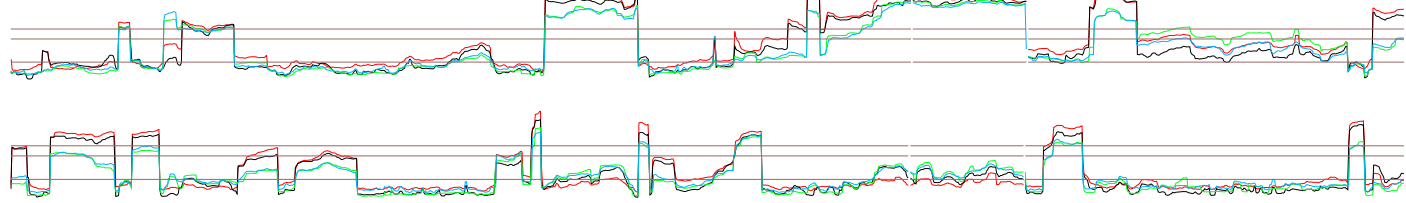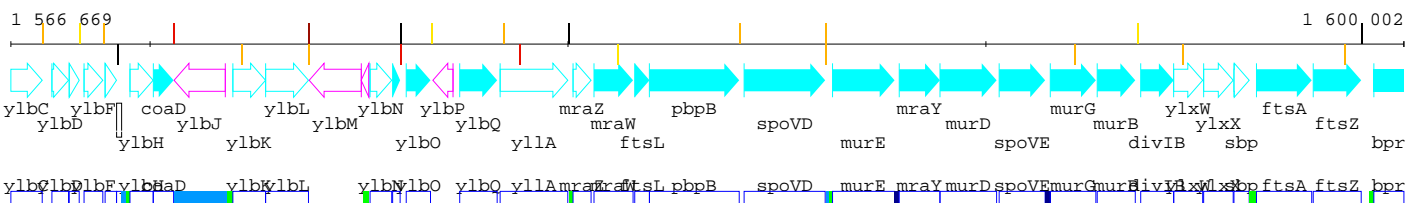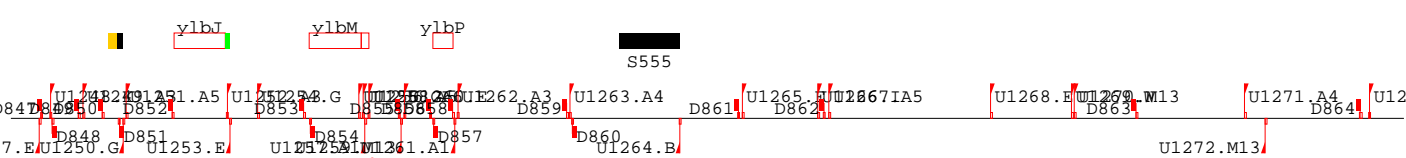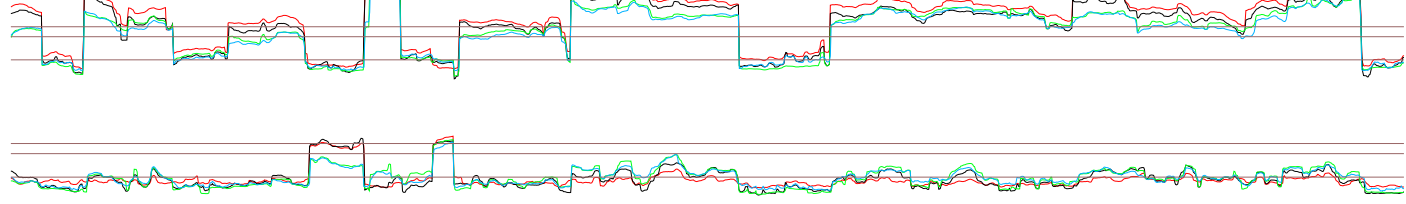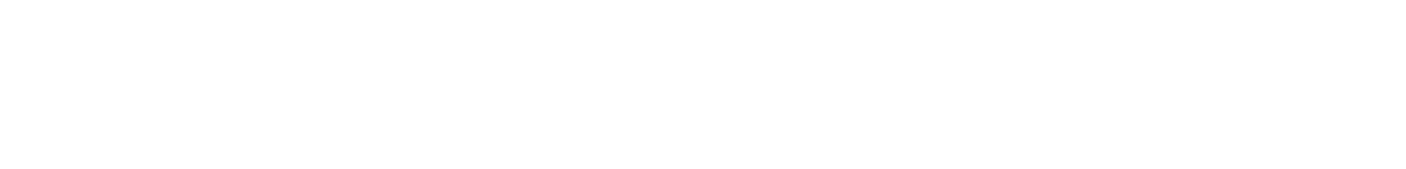

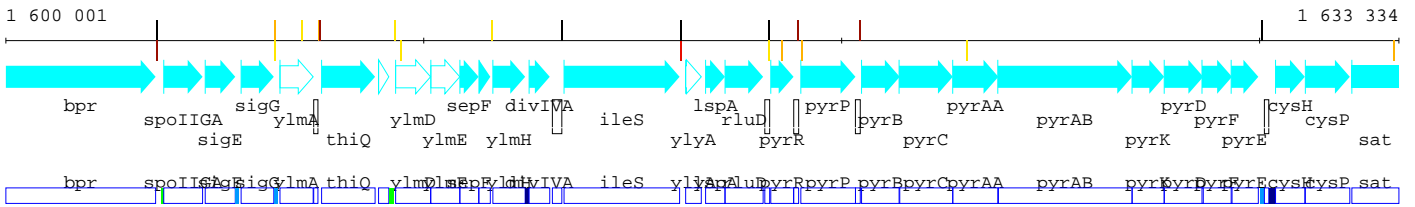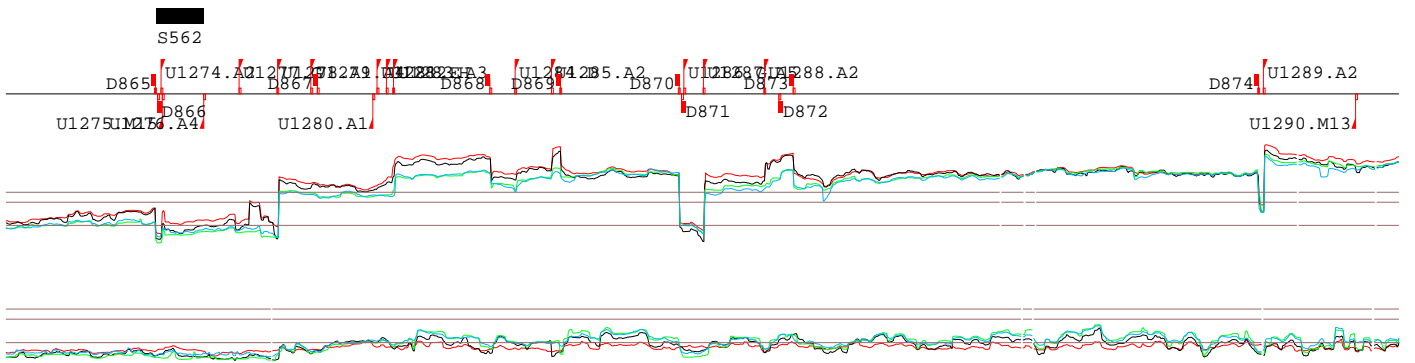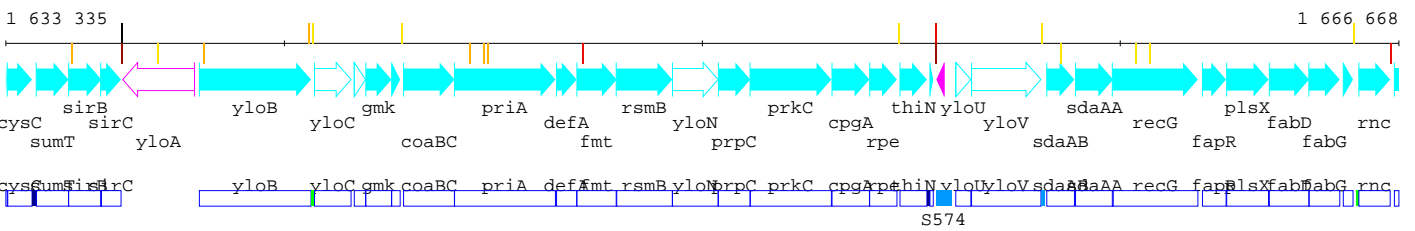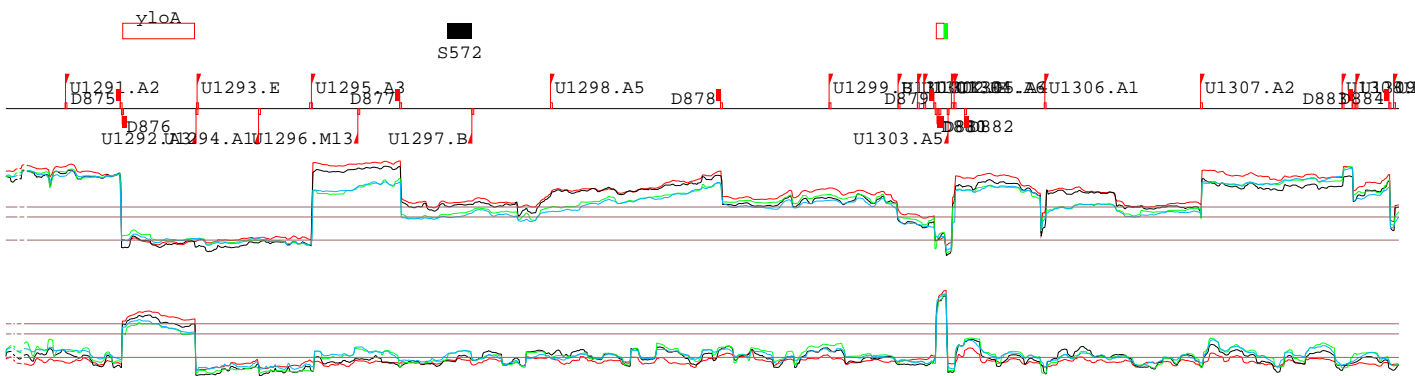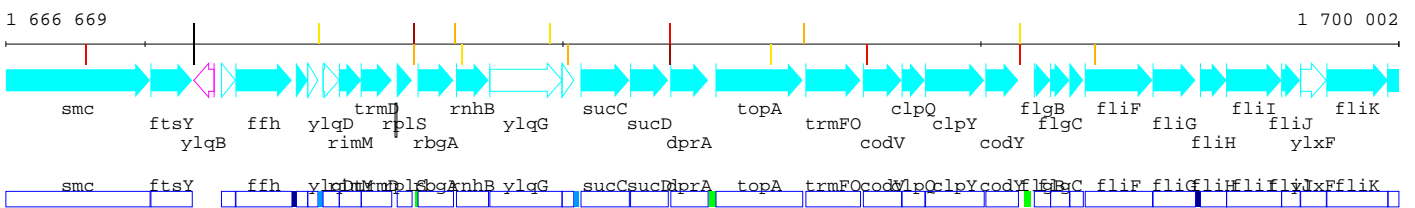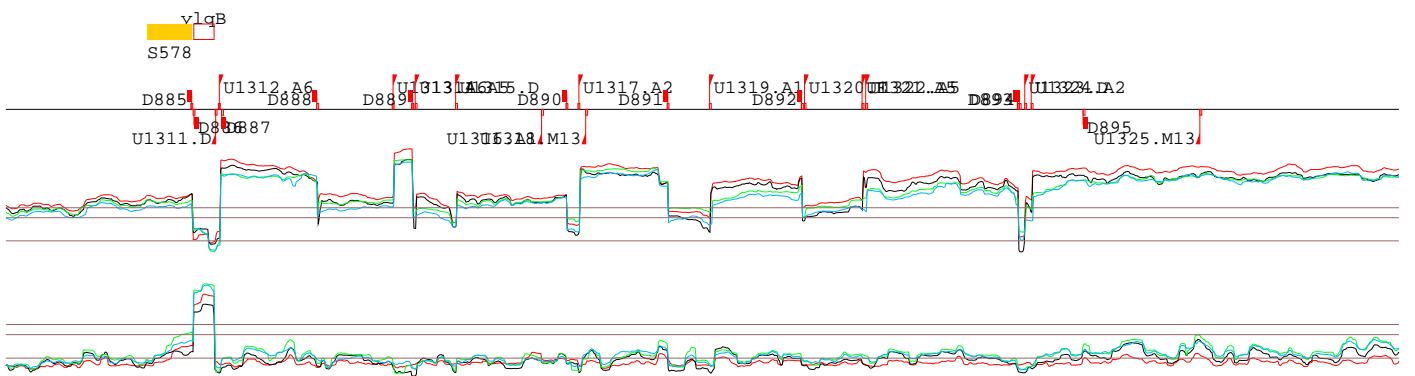

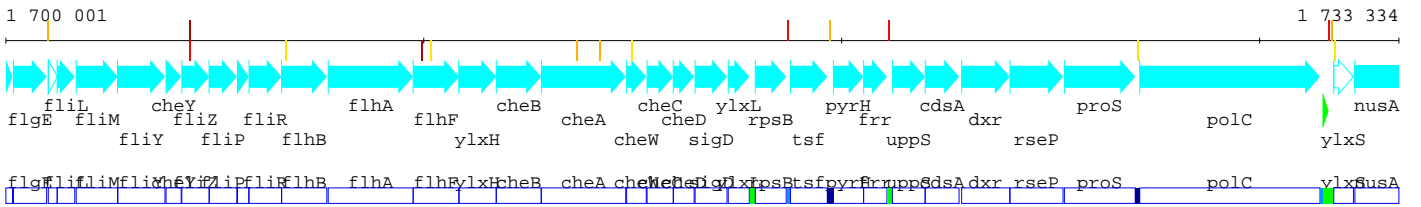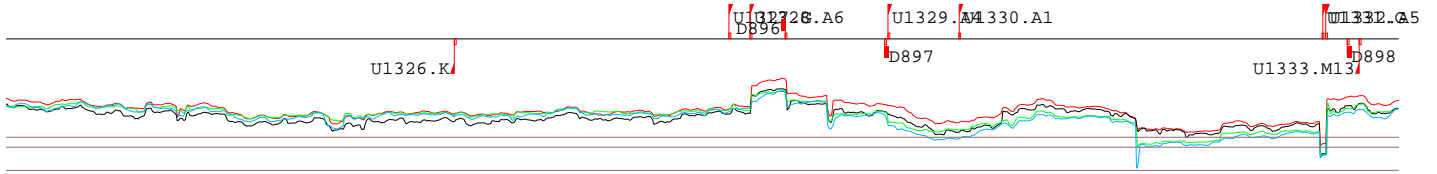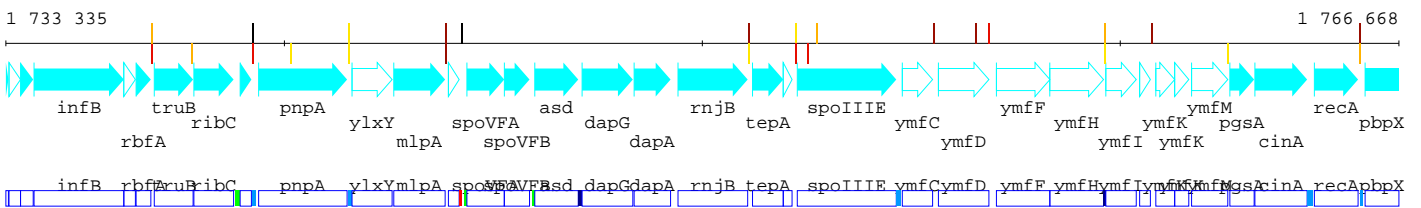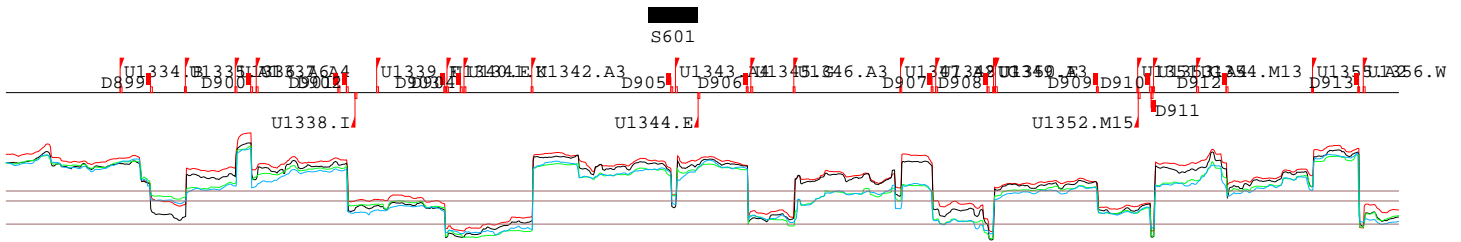

1 800 001

1 833 334

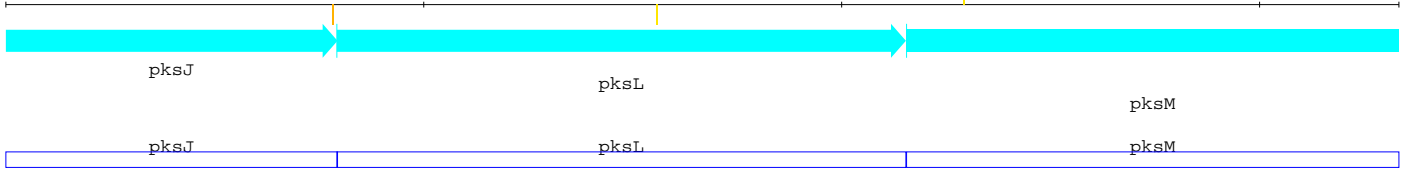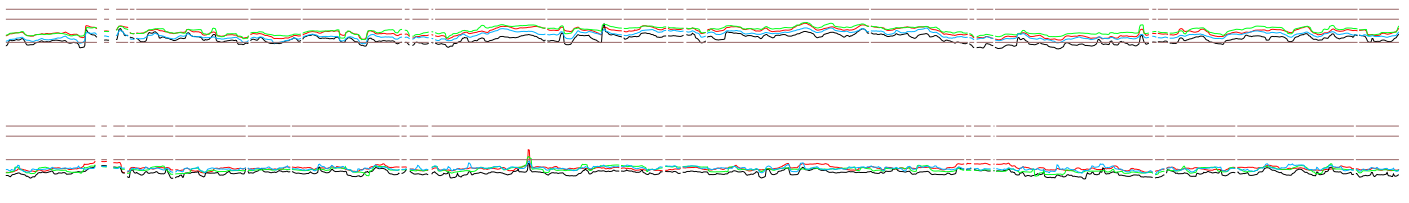

1 833 335

1 866 668

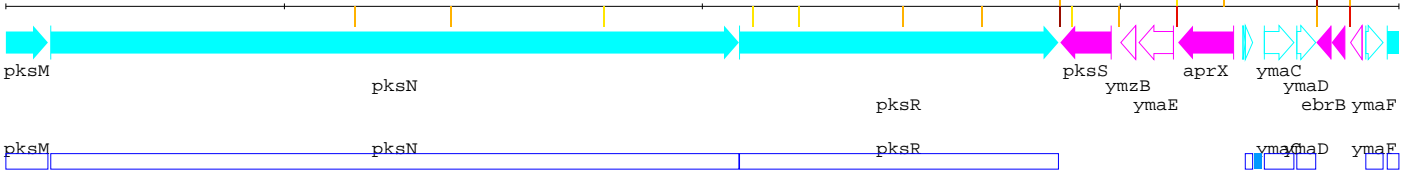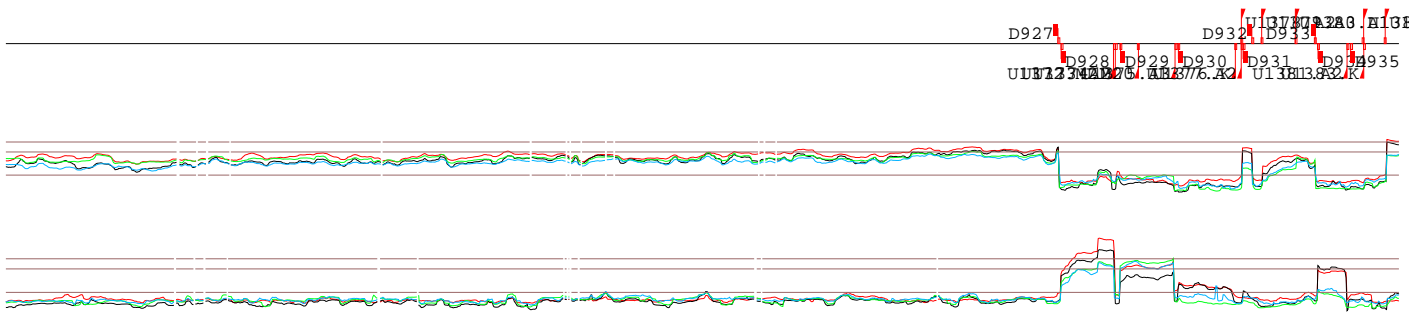

1 866 669

1 900 002

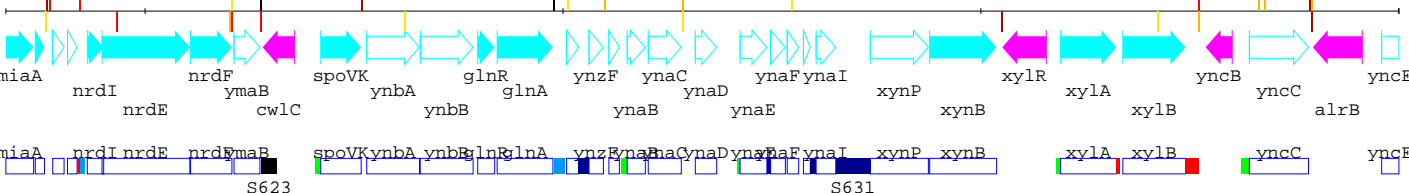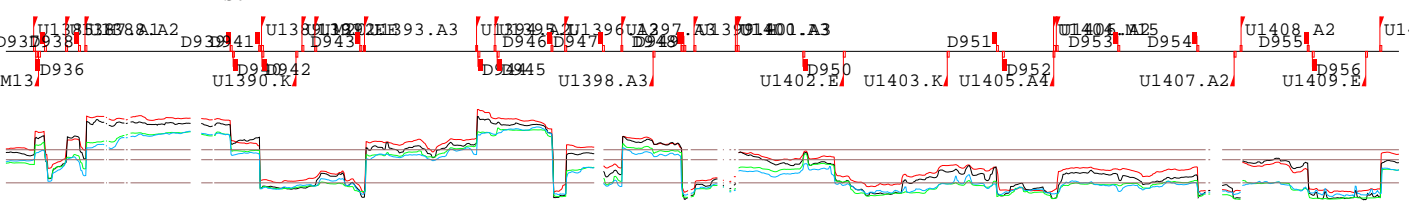



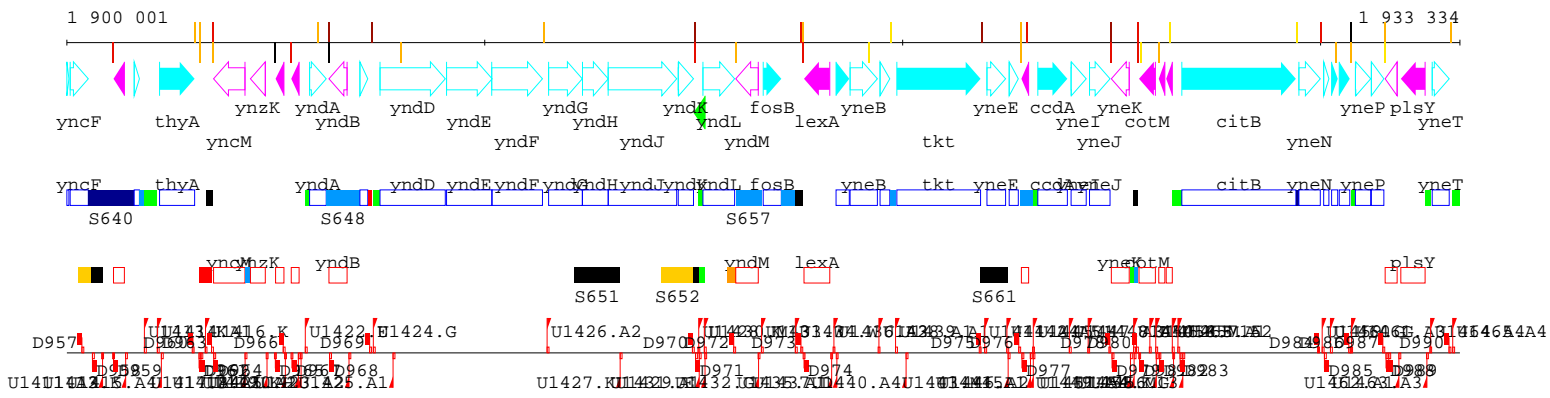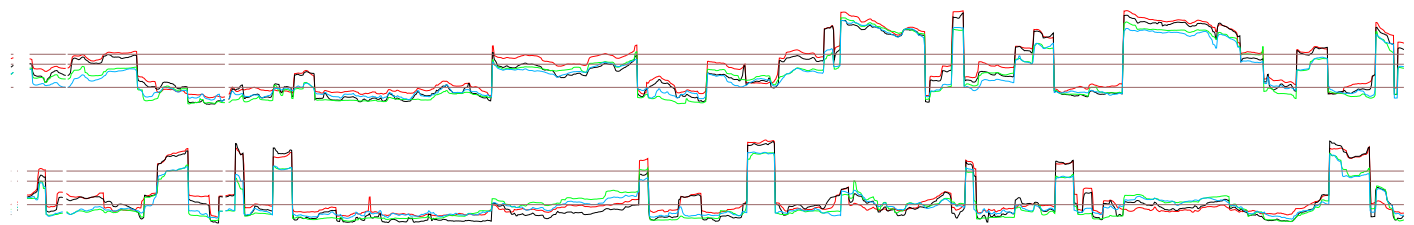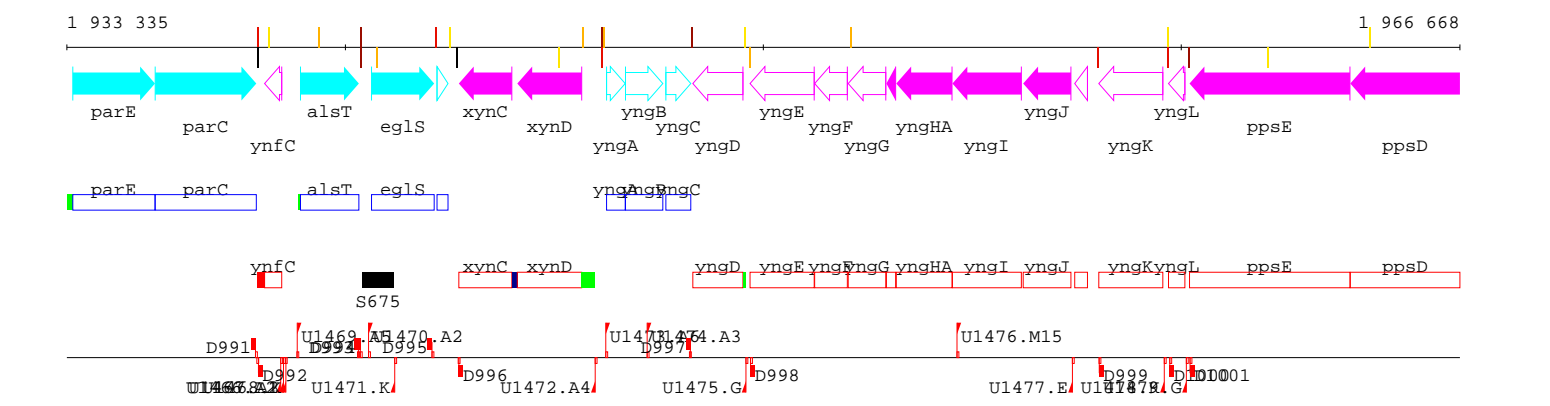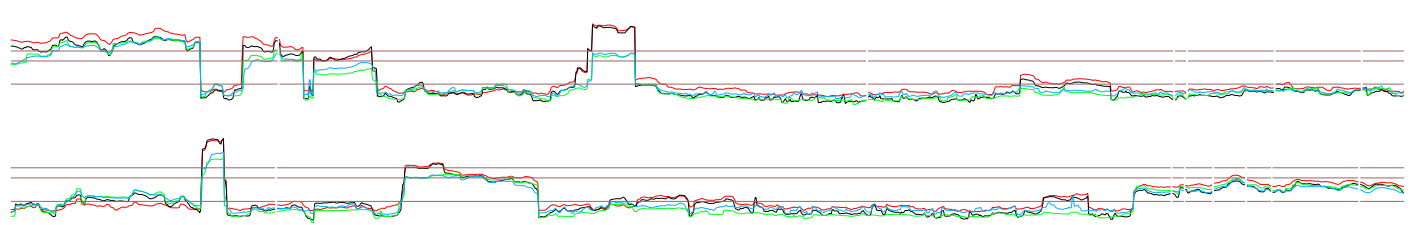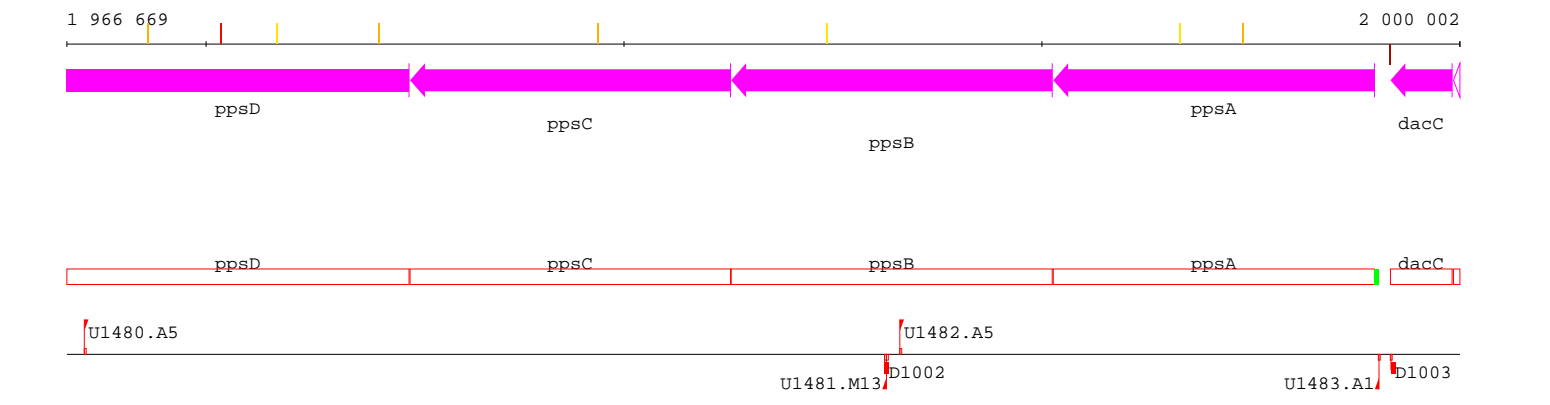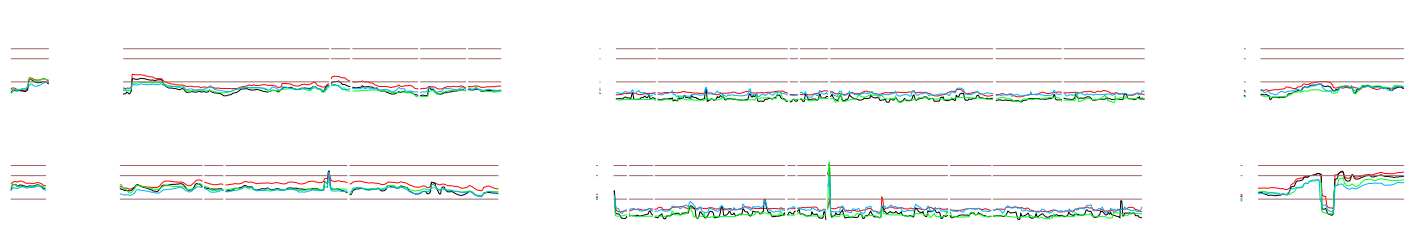









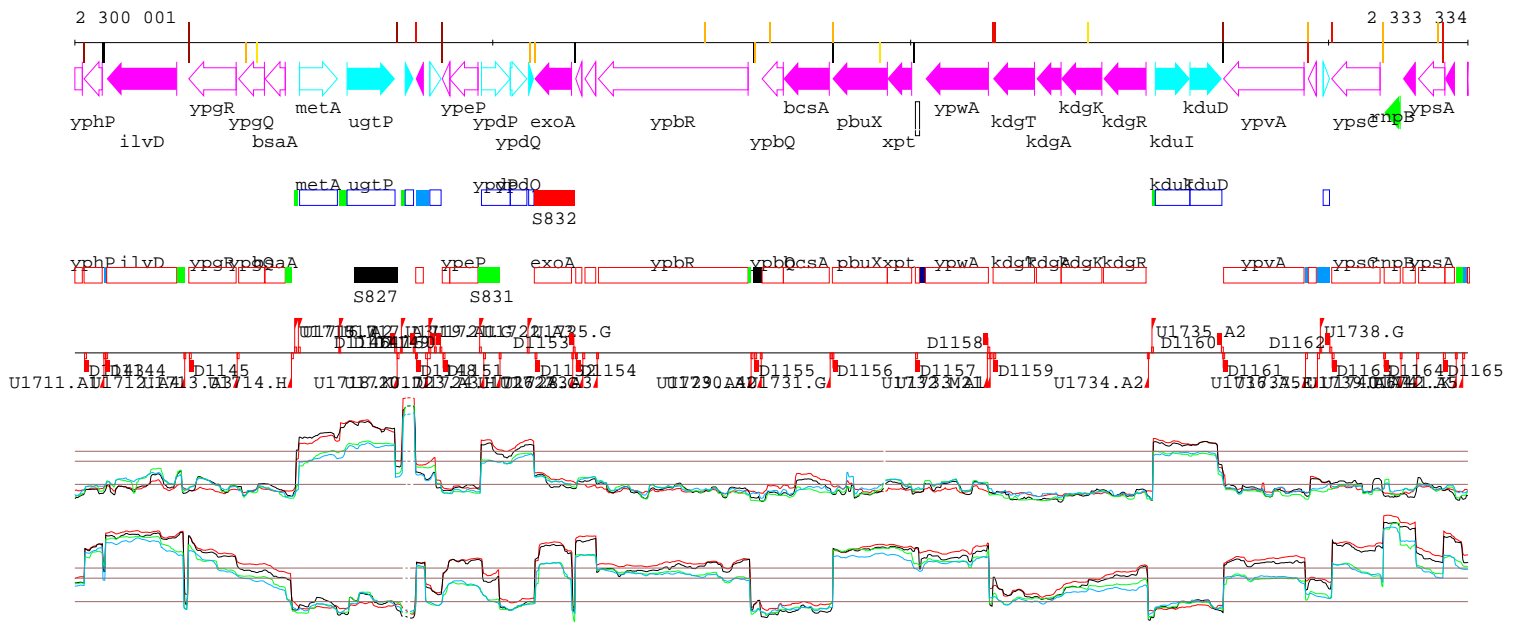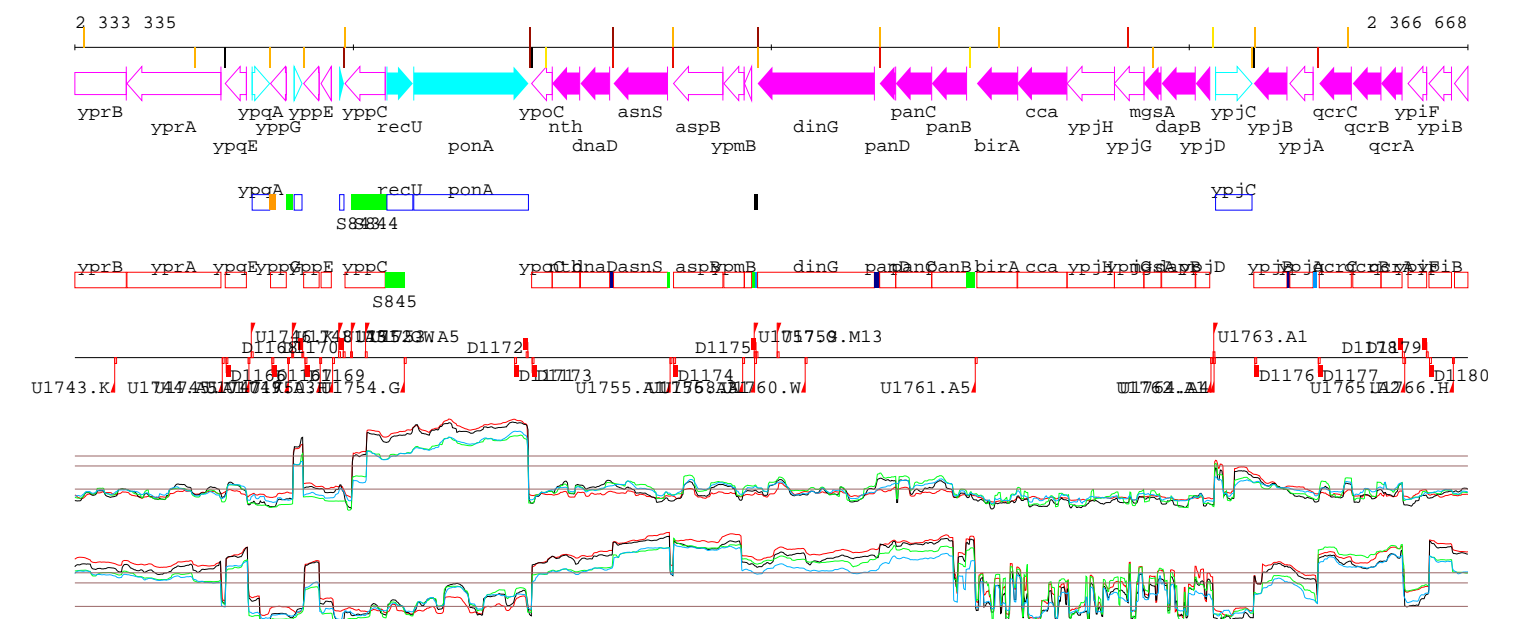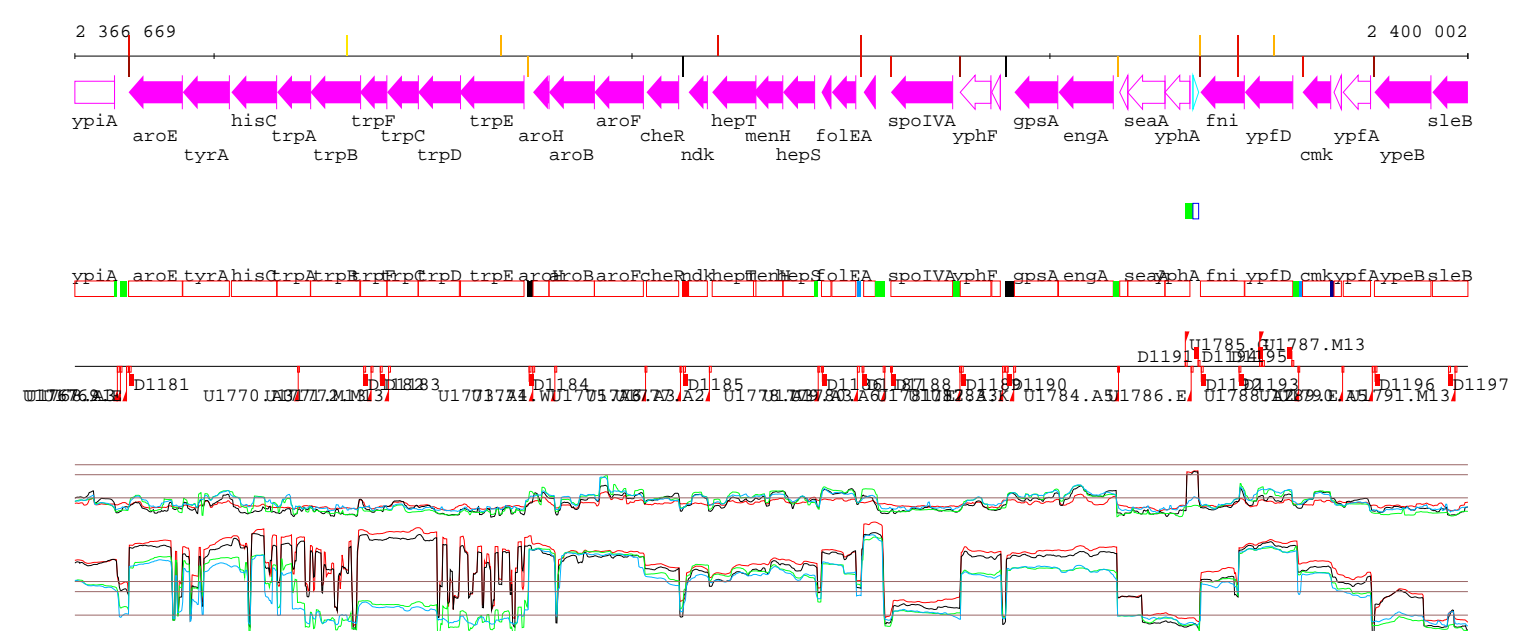

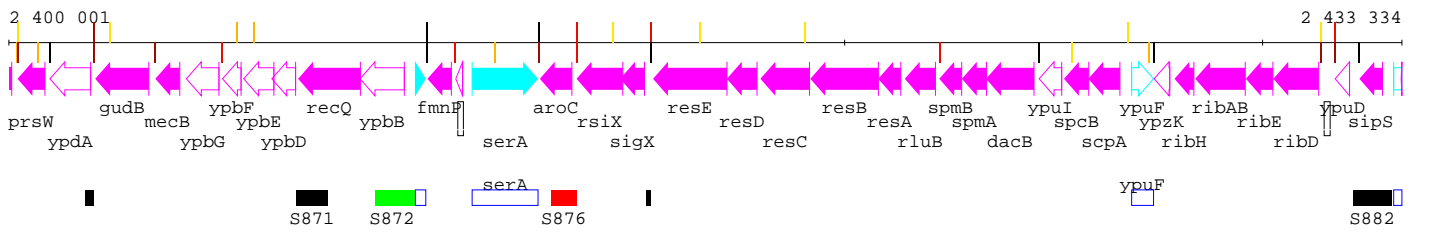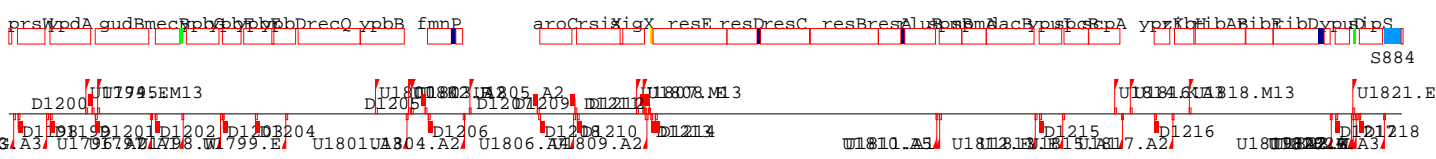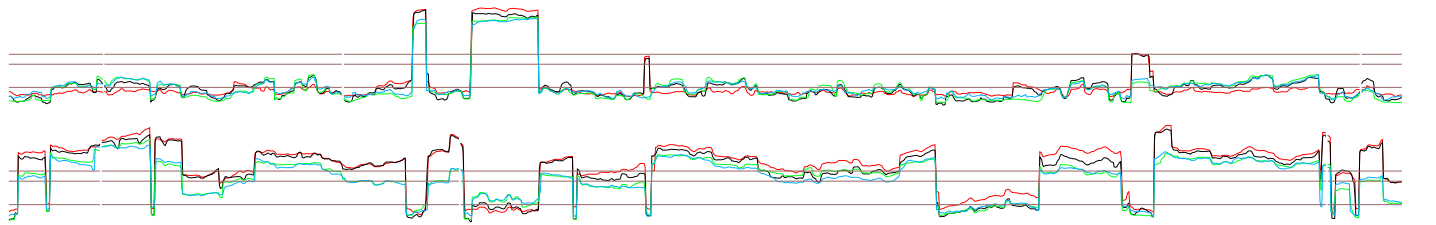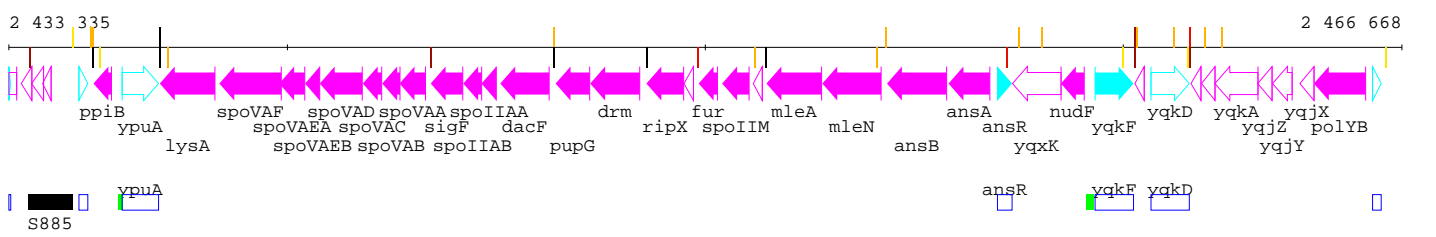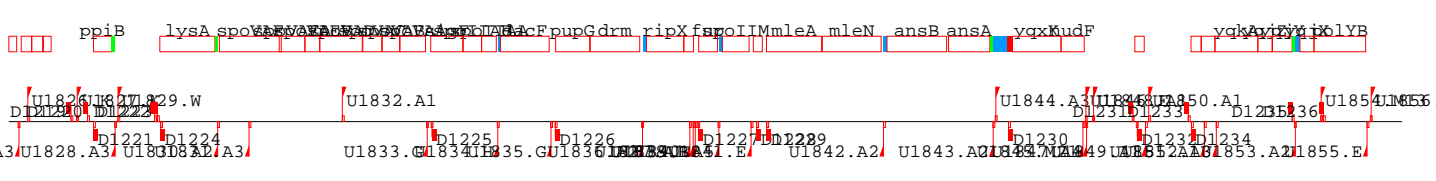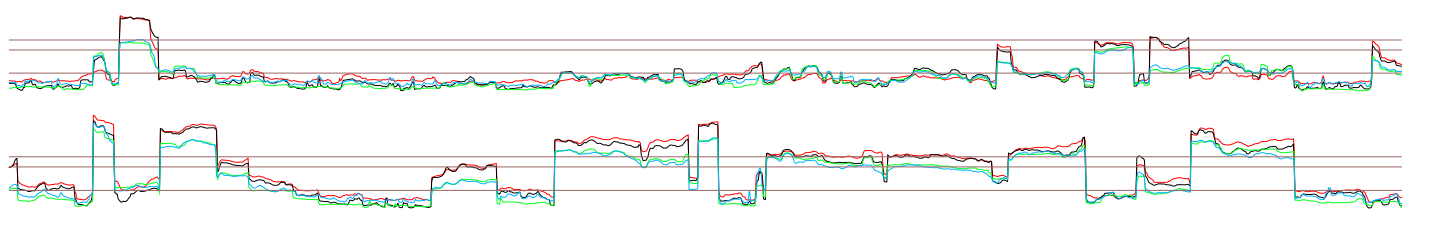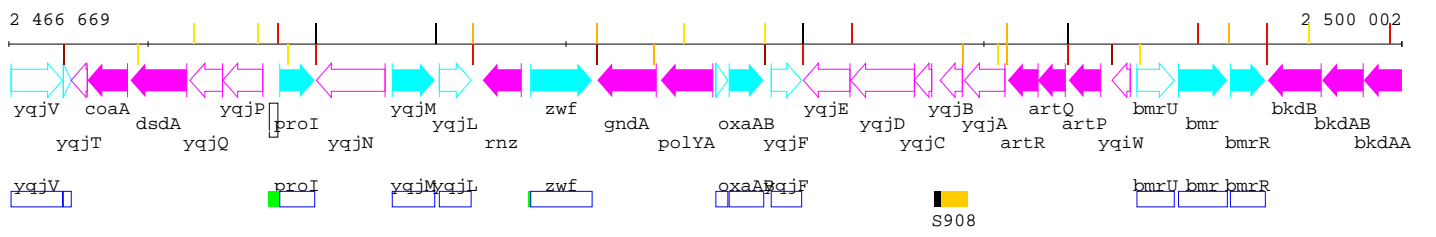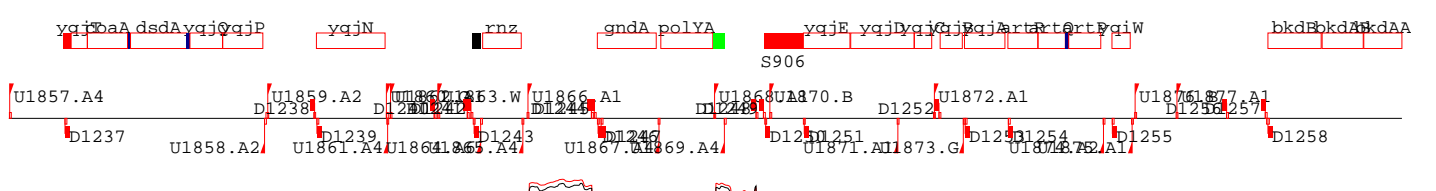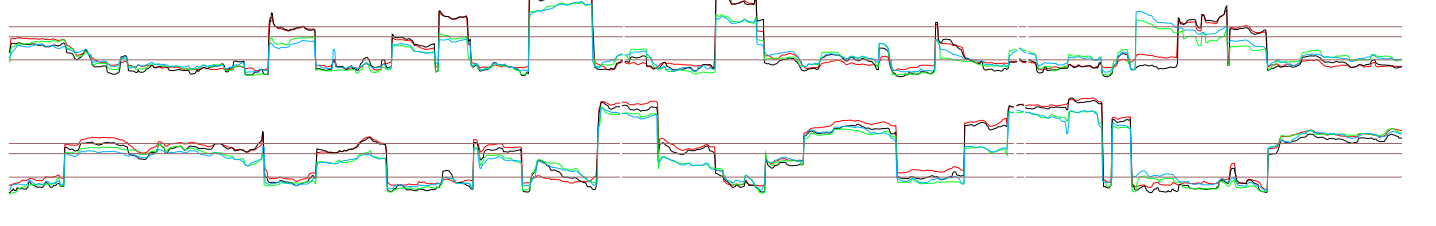





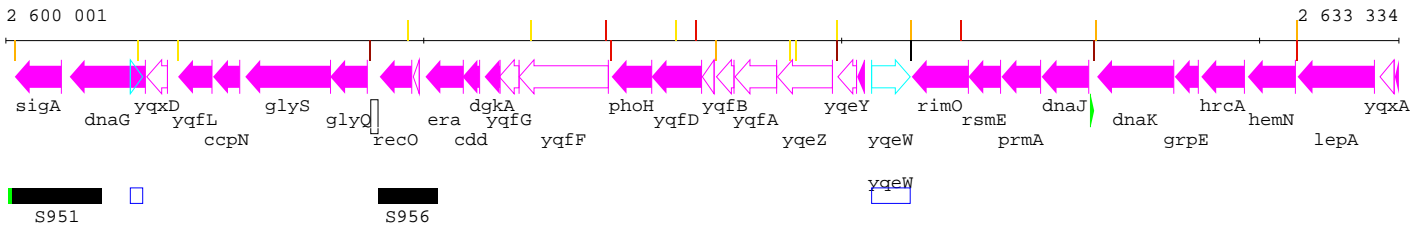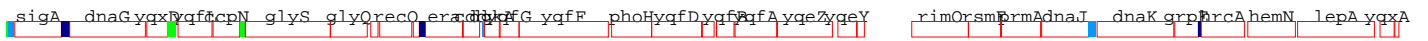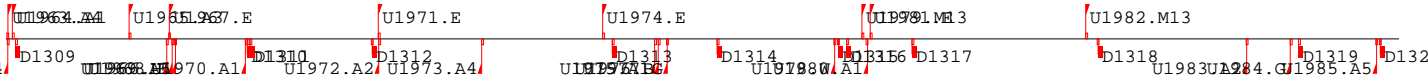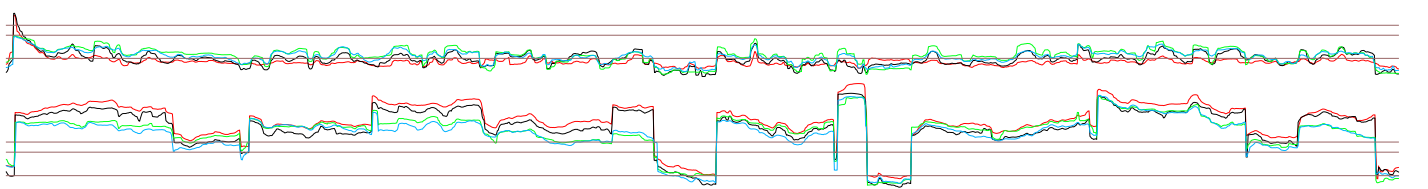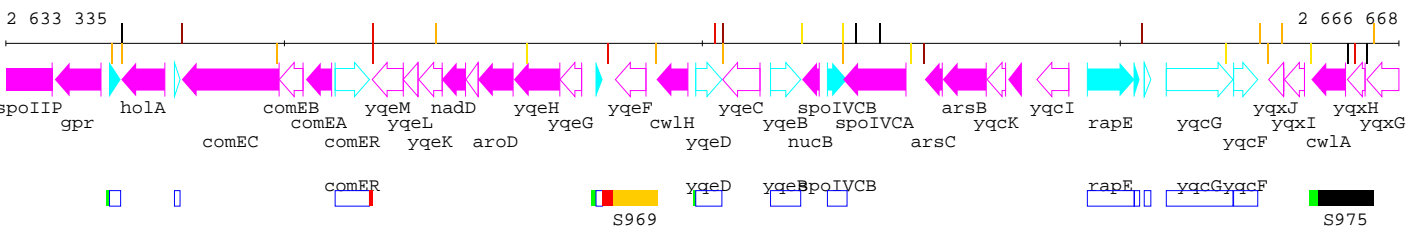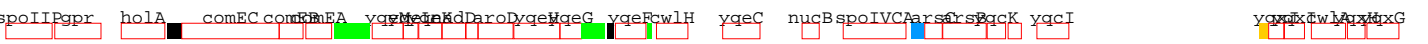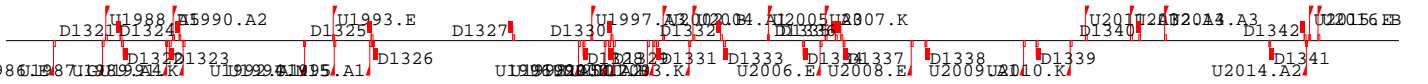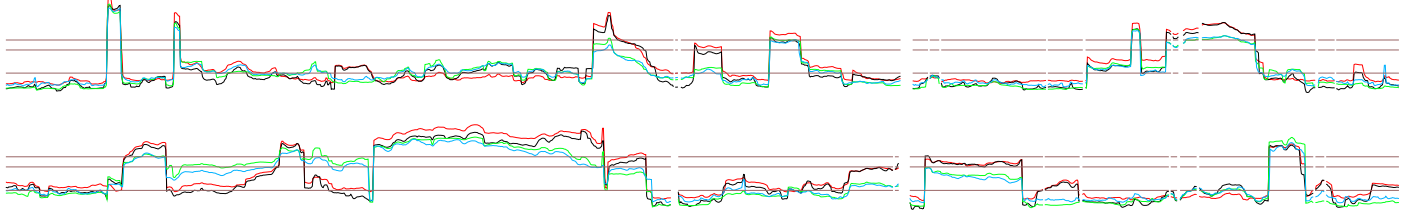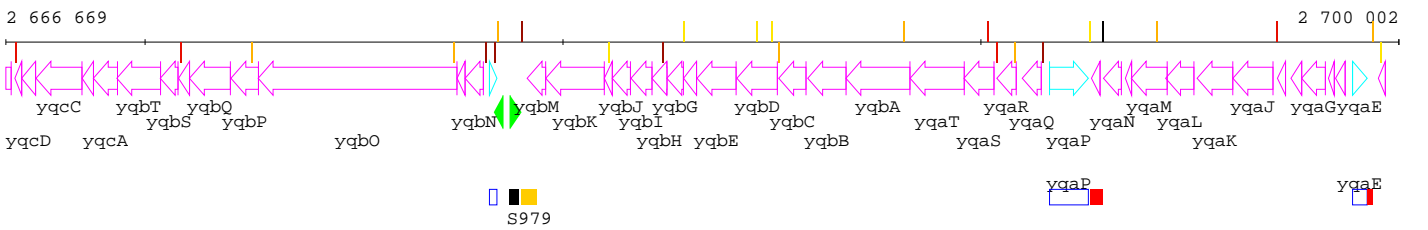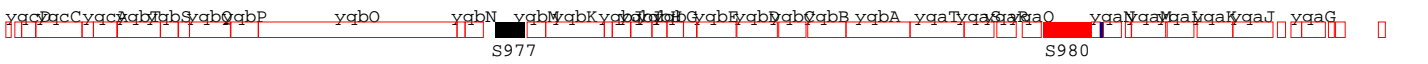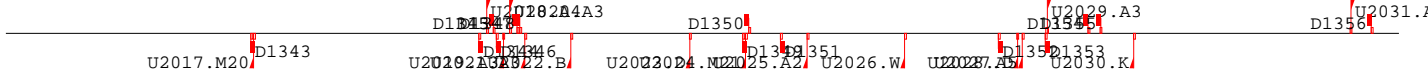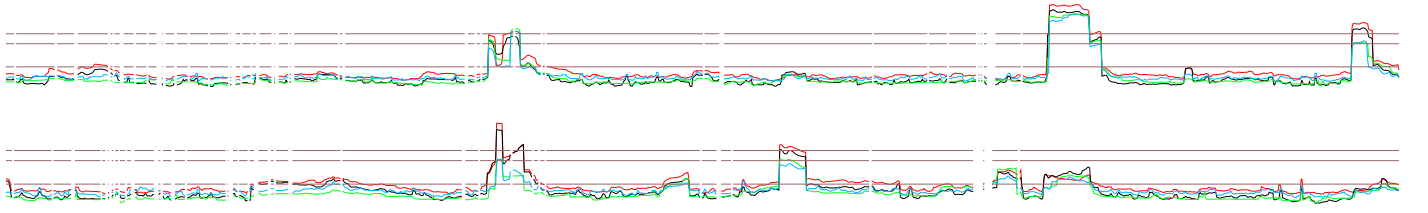

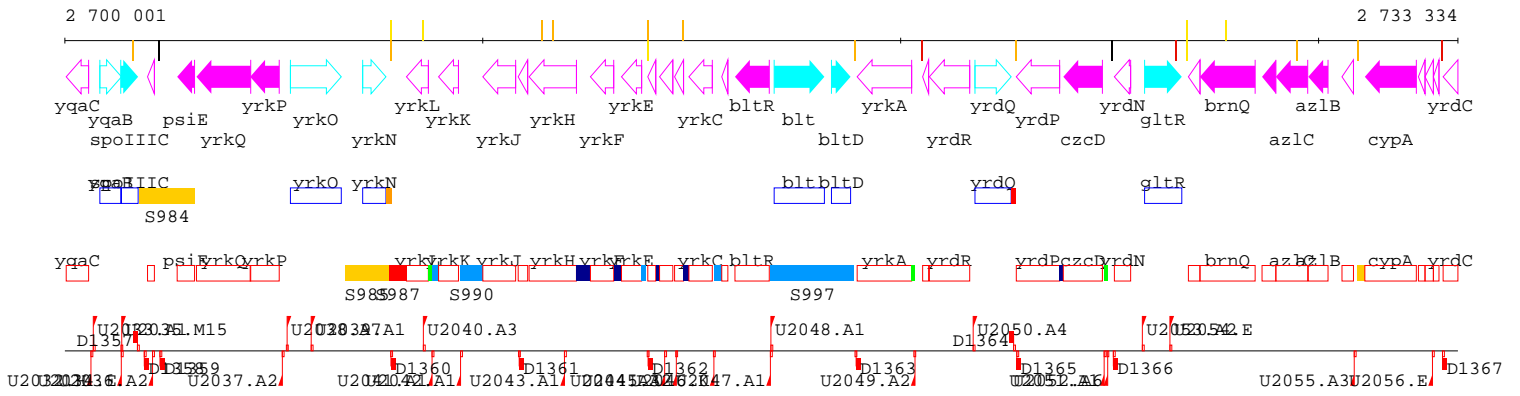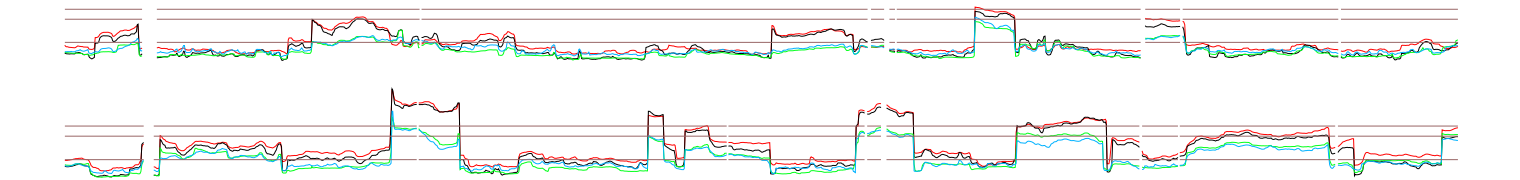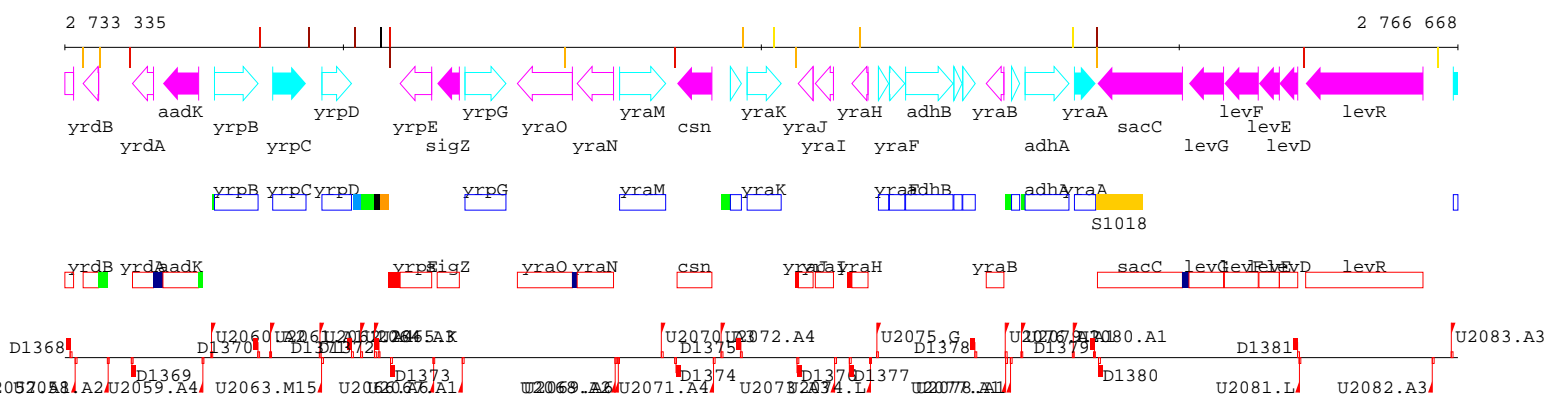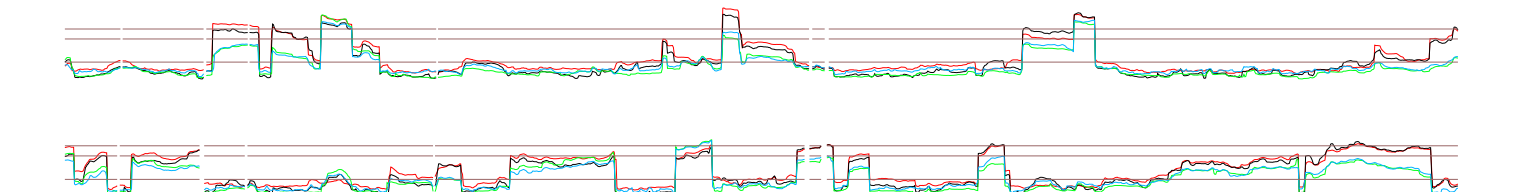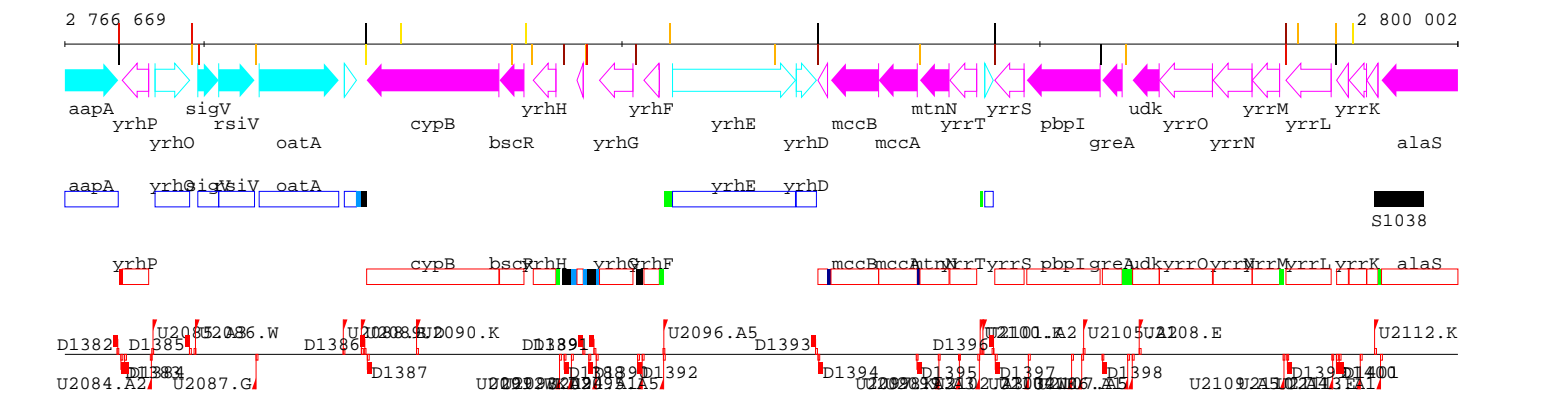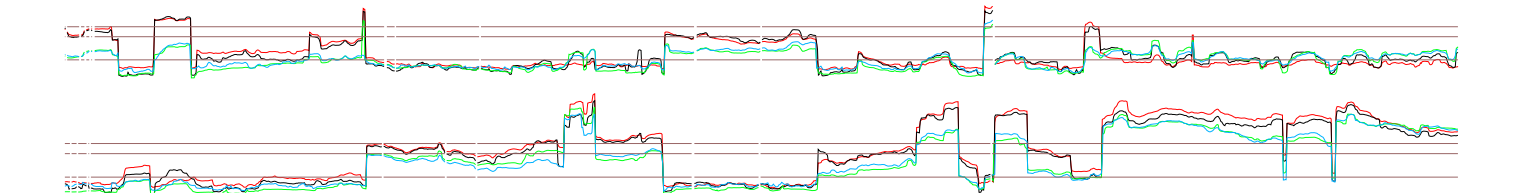



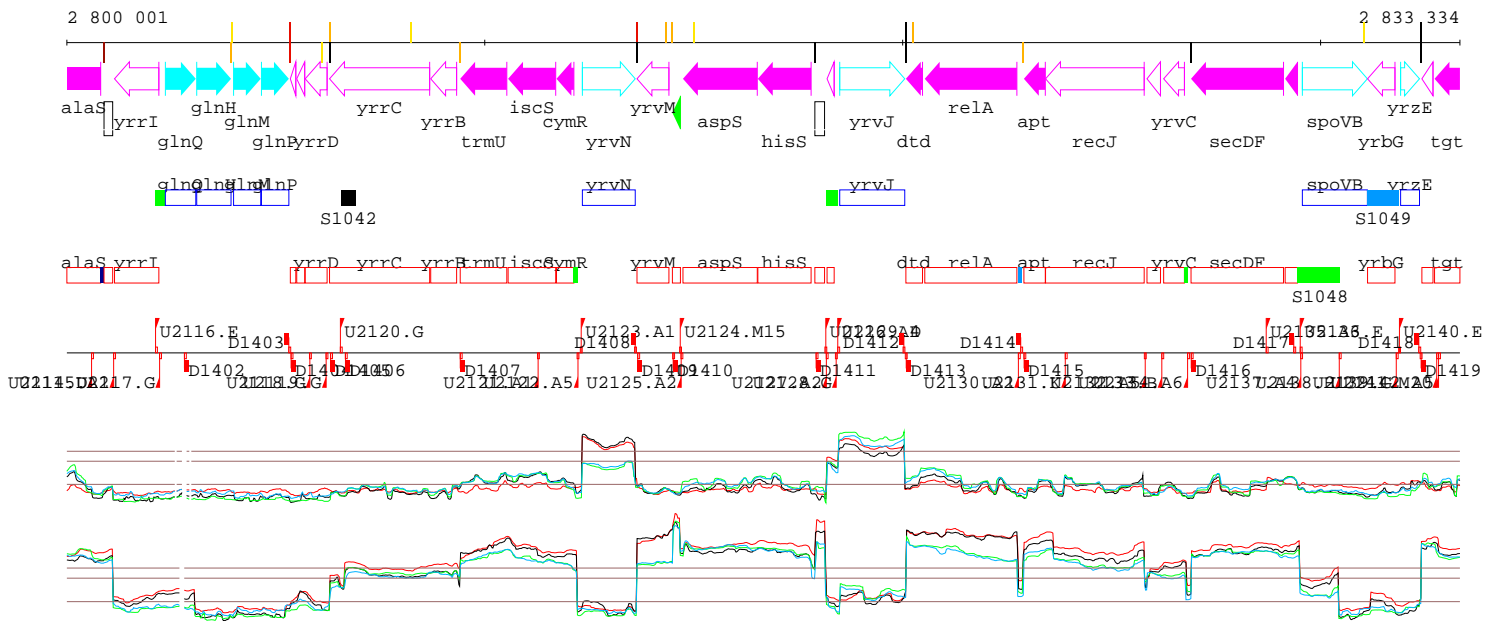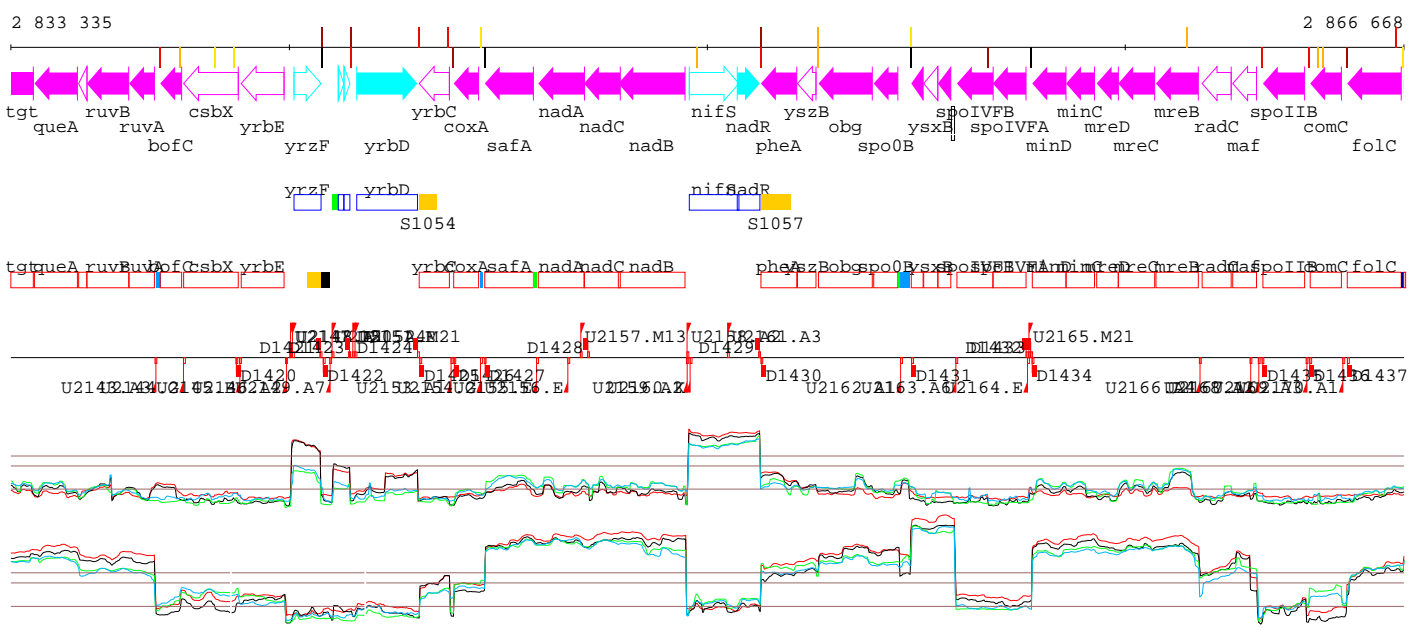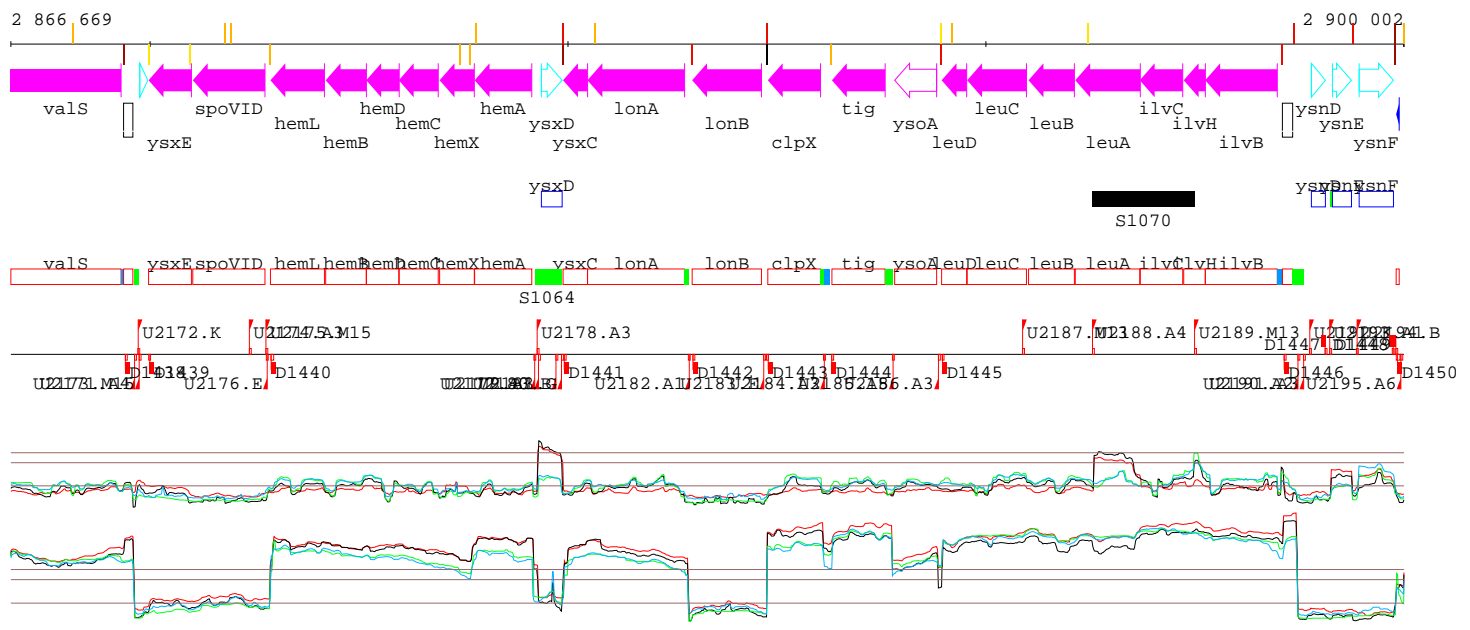



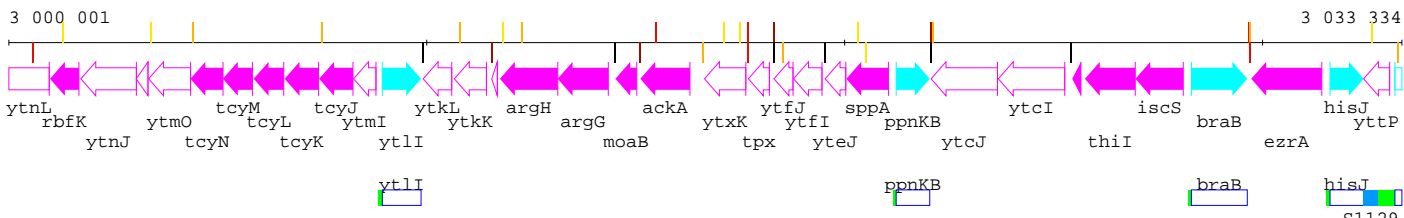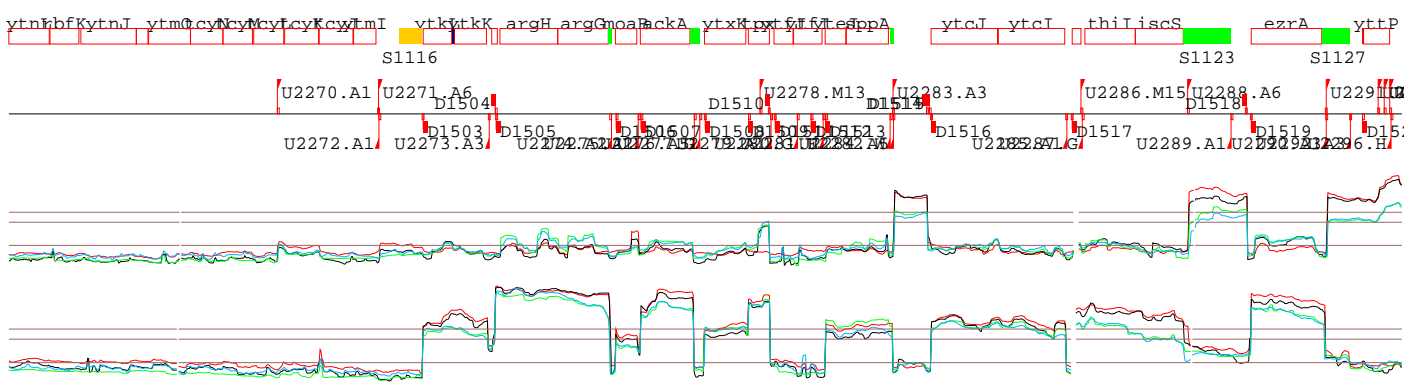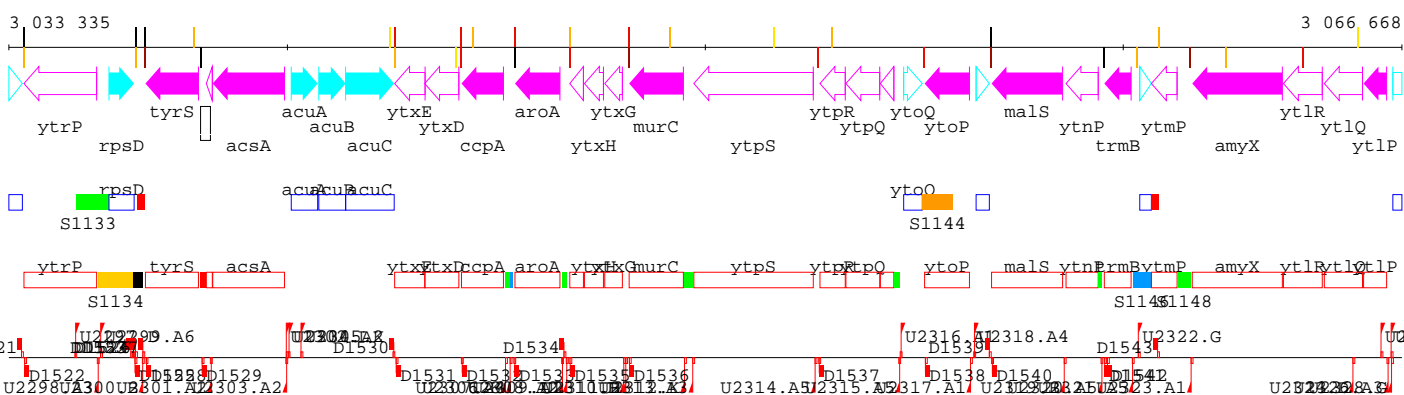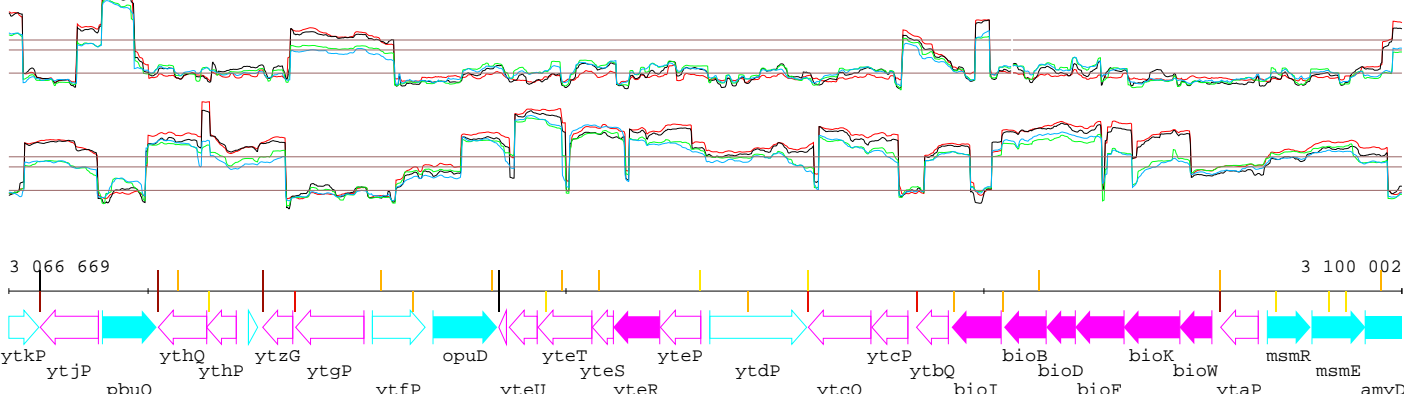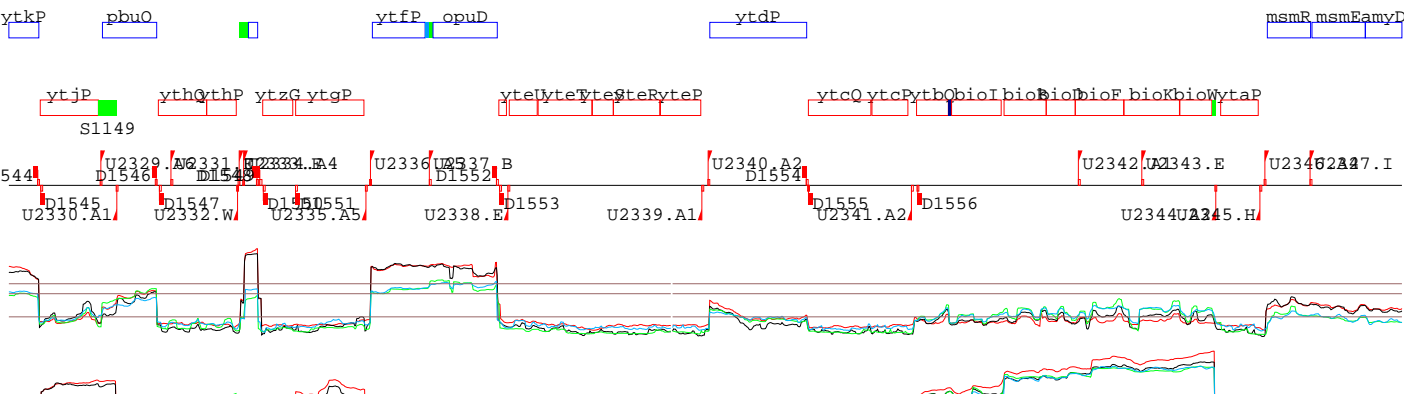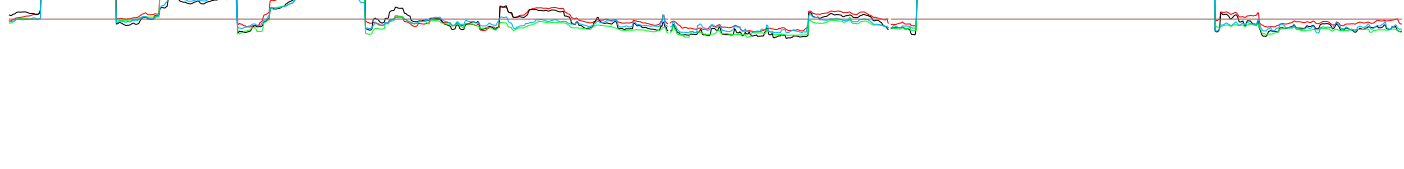

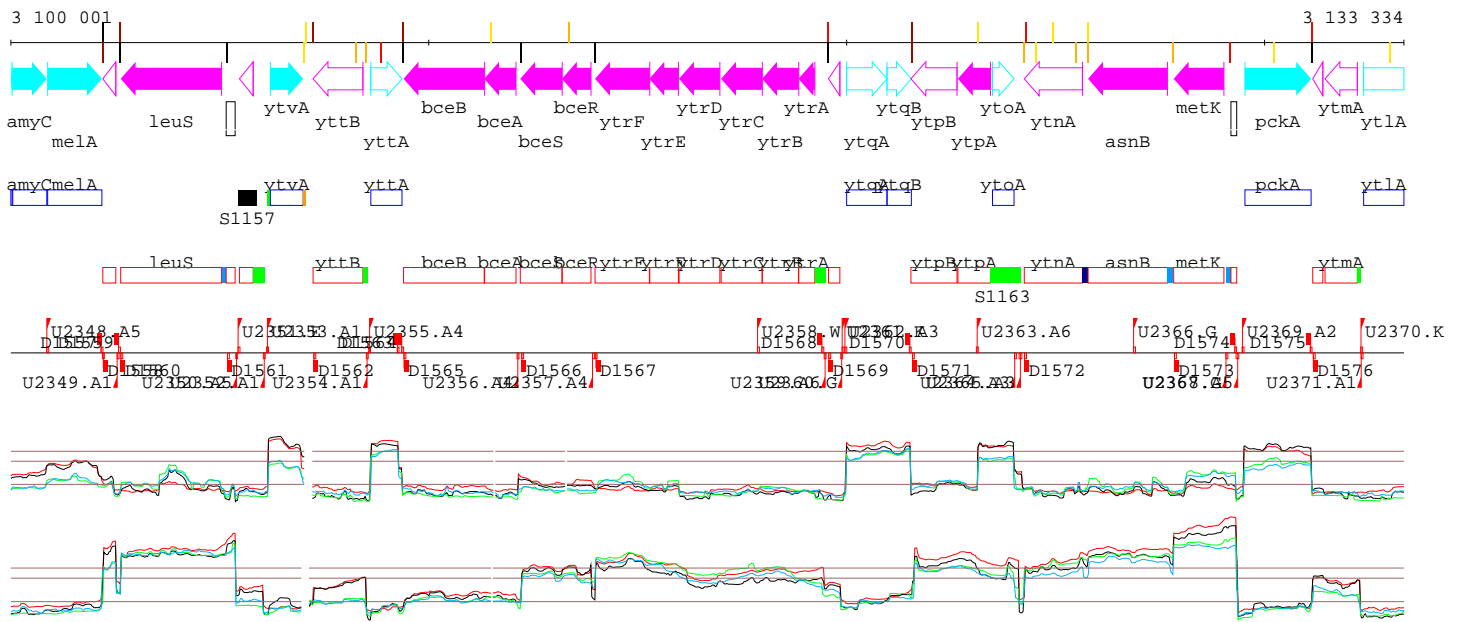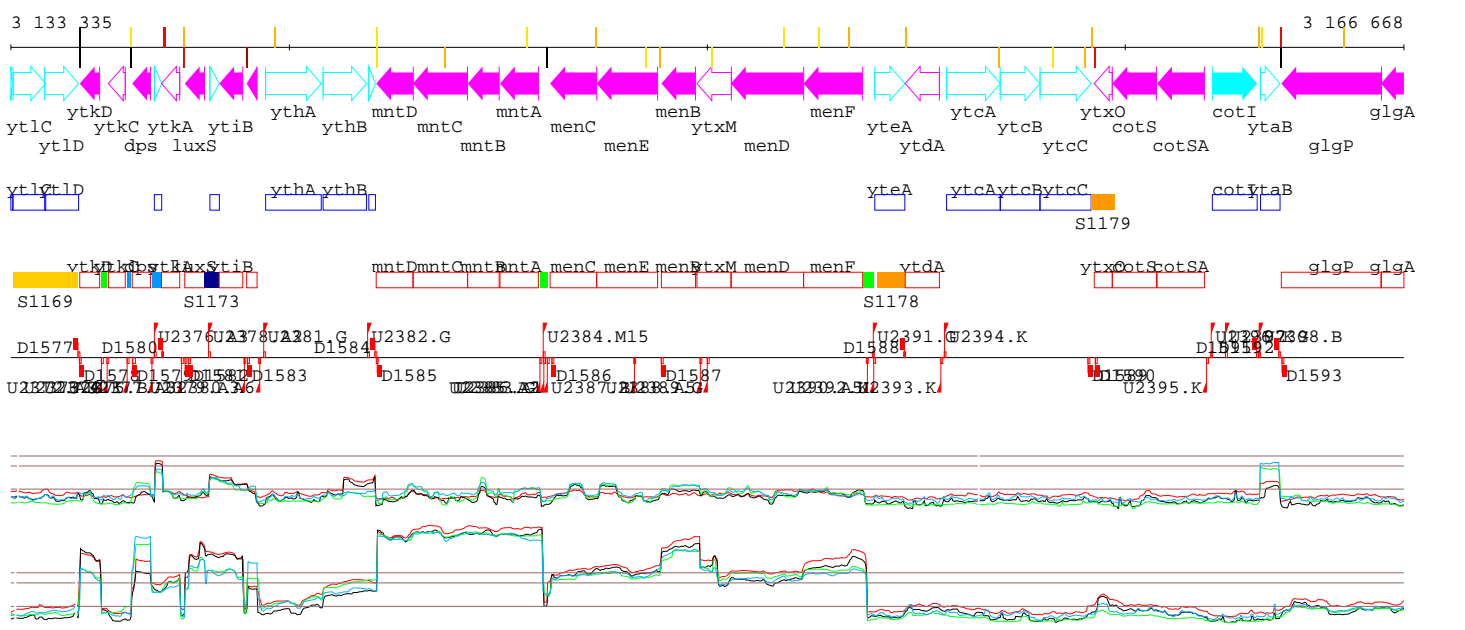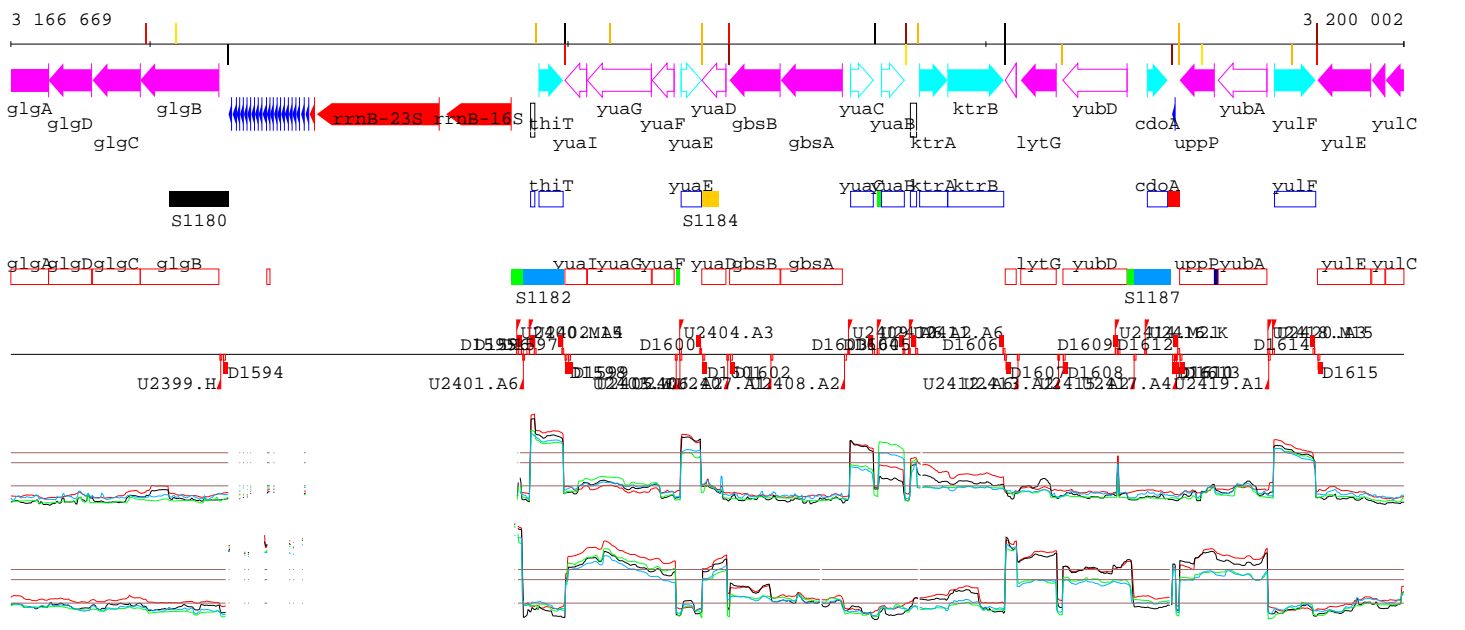



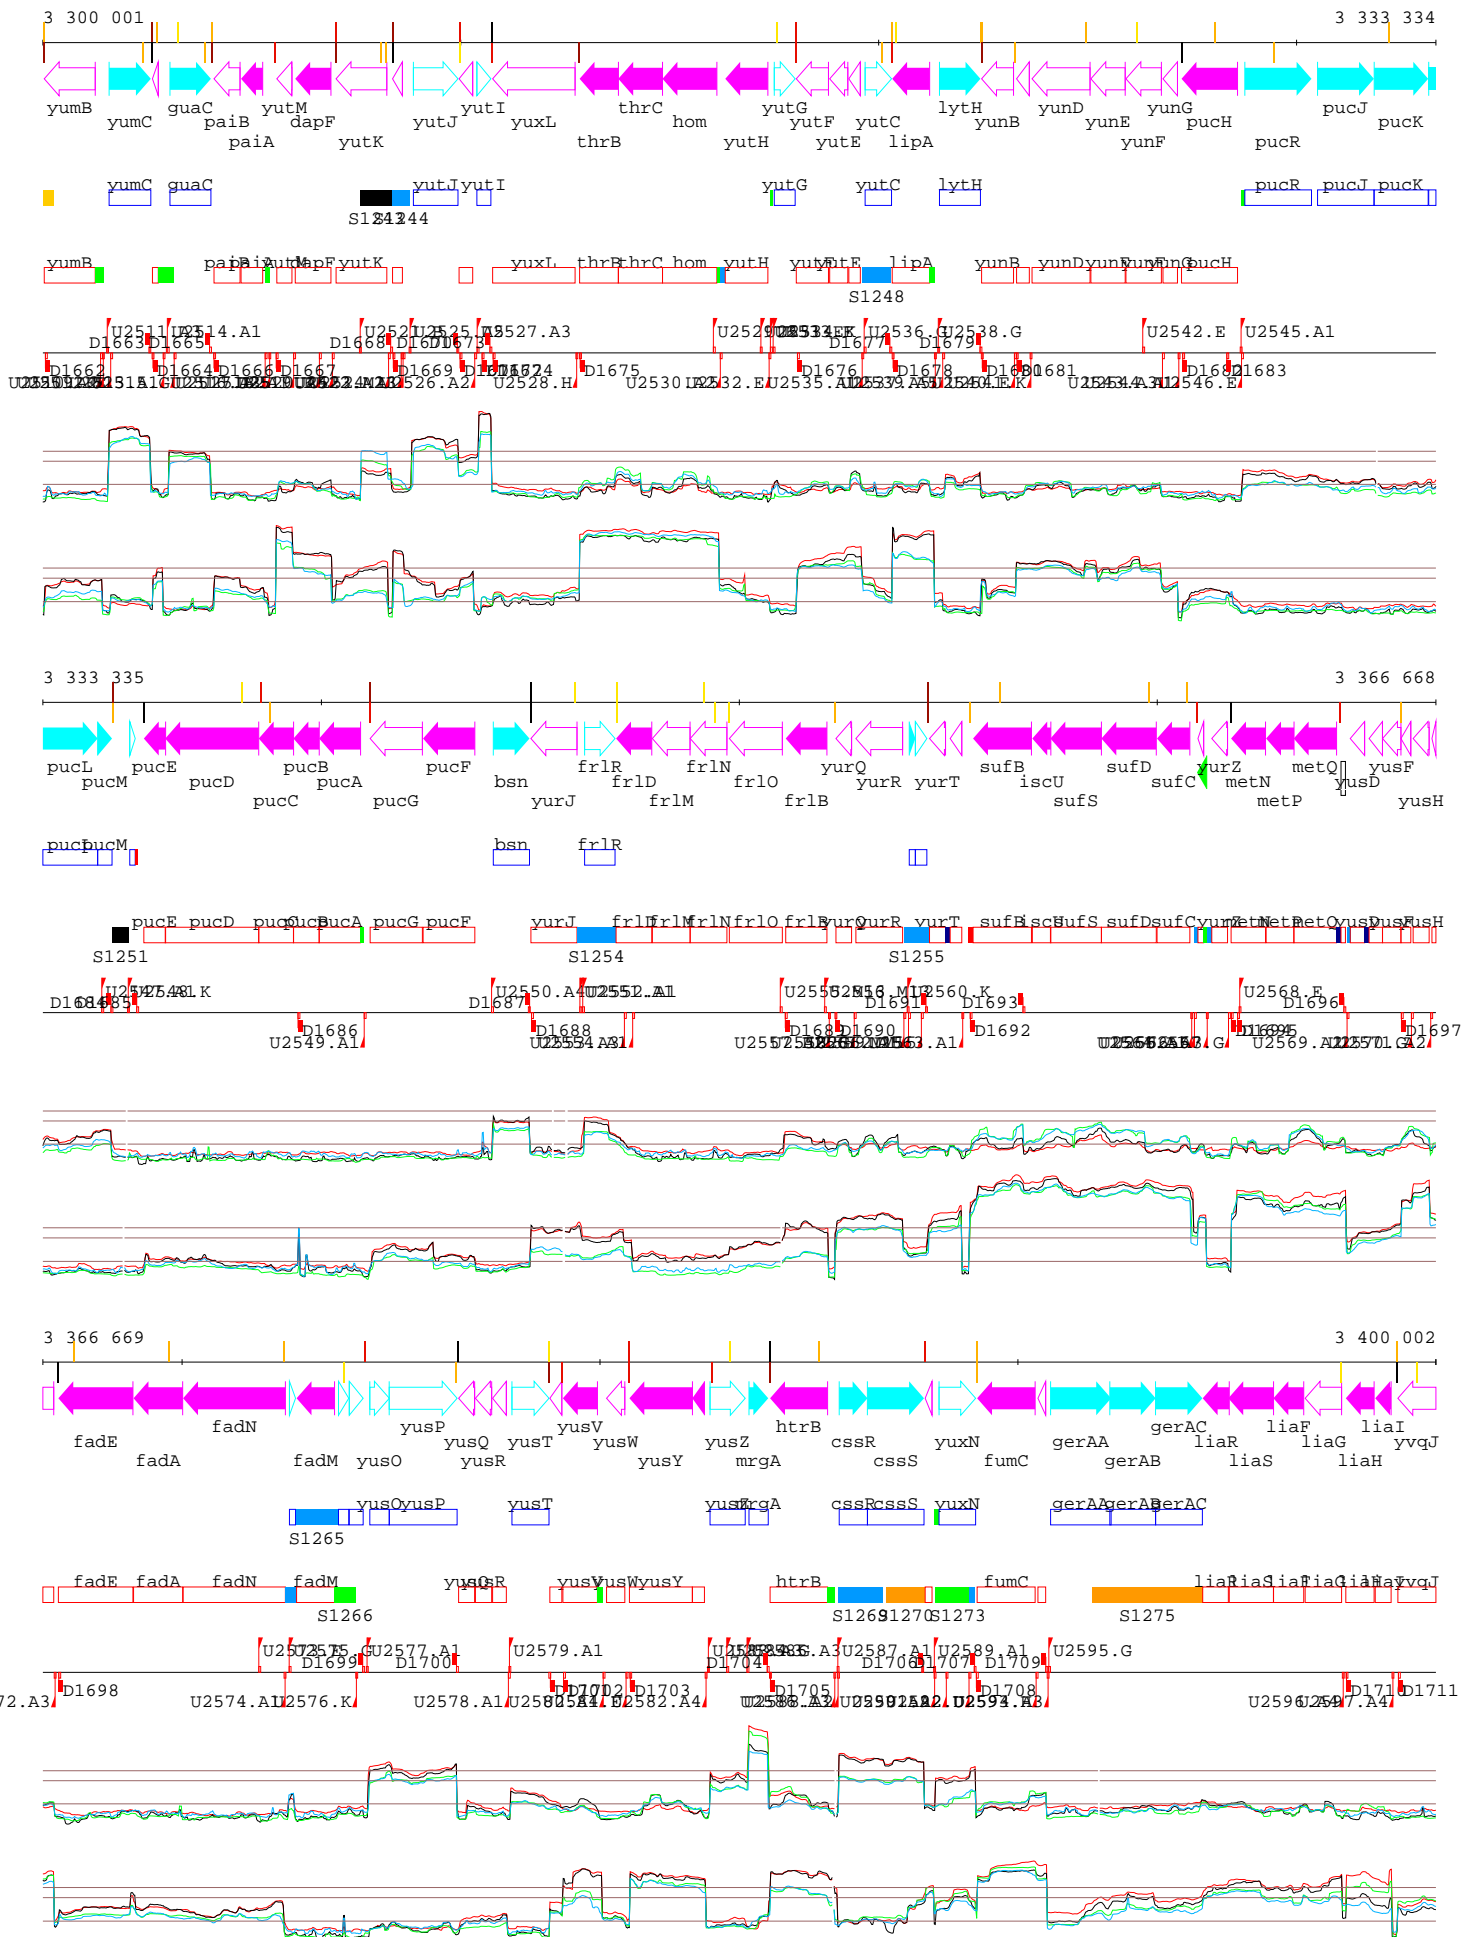





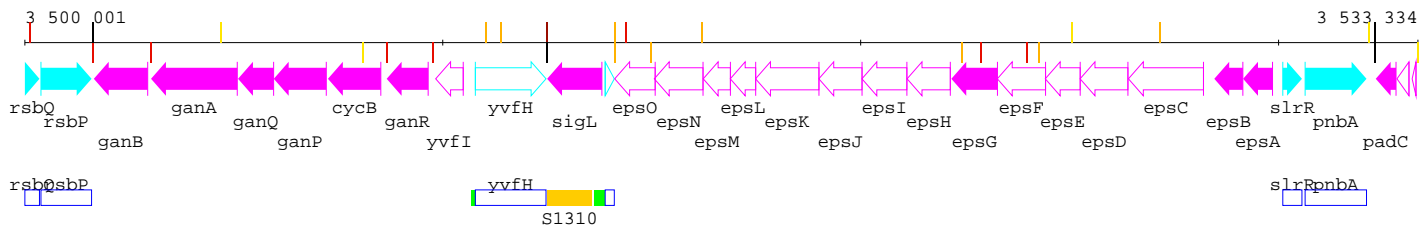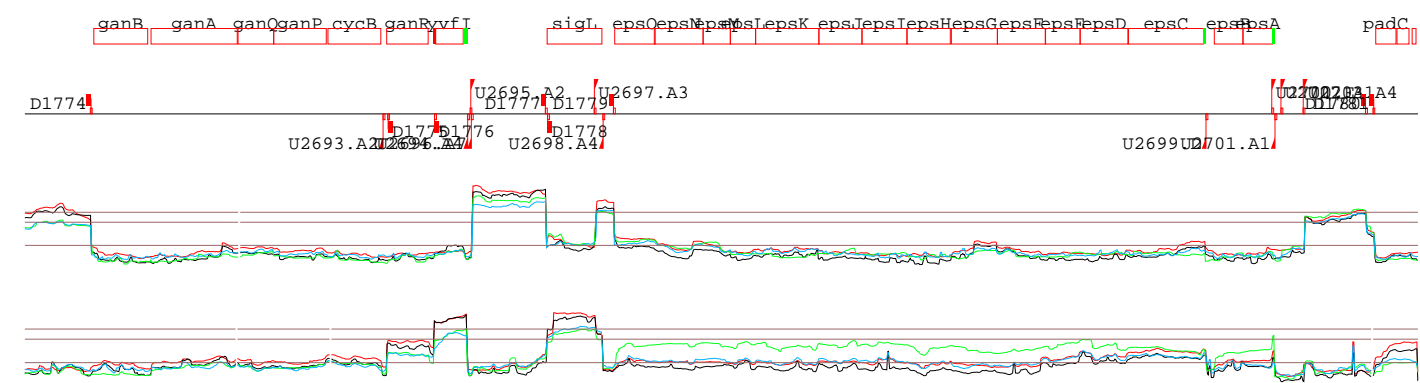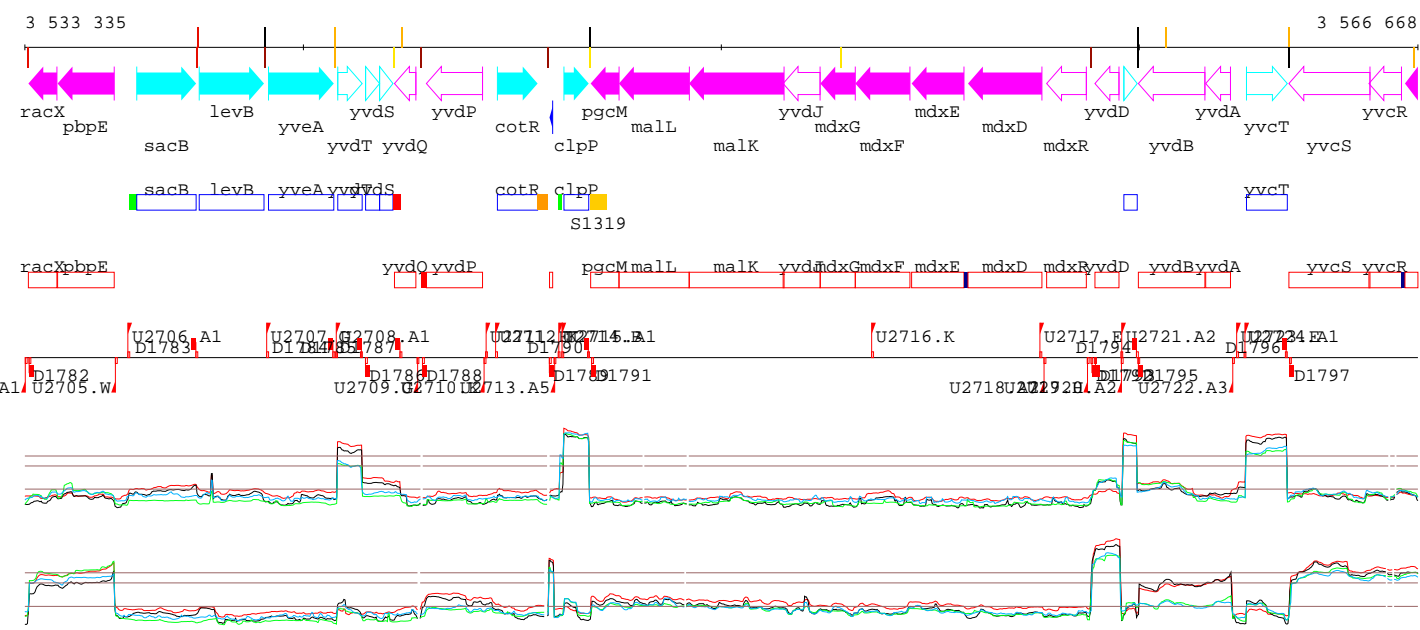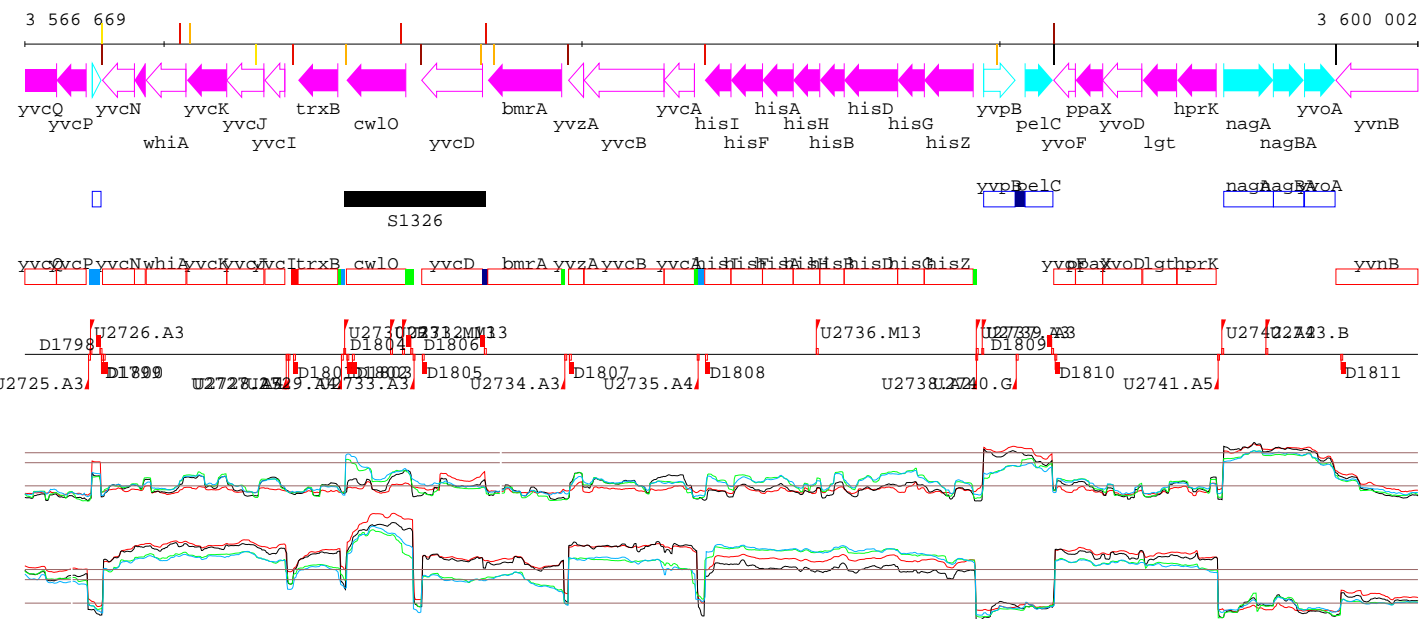



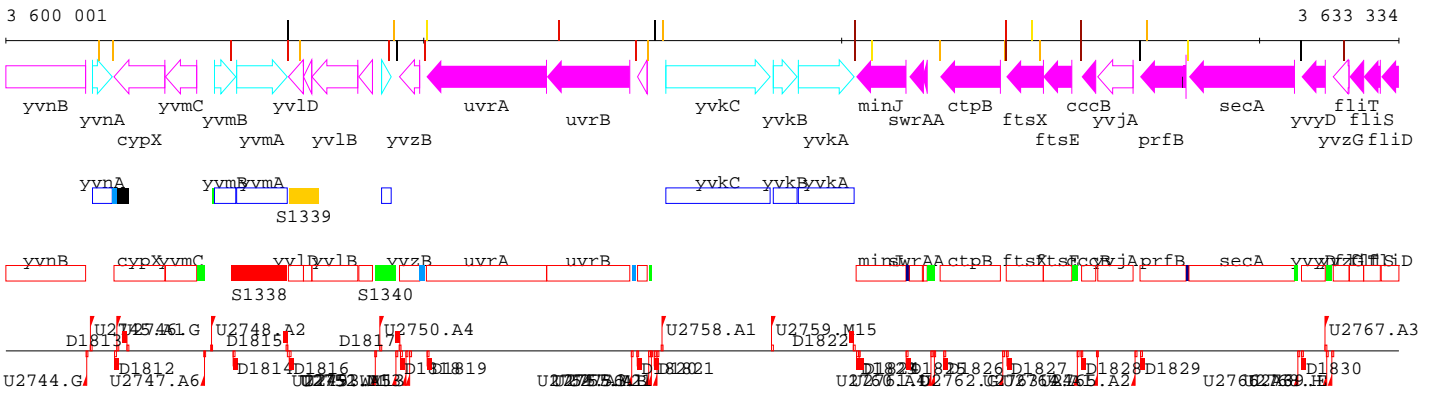

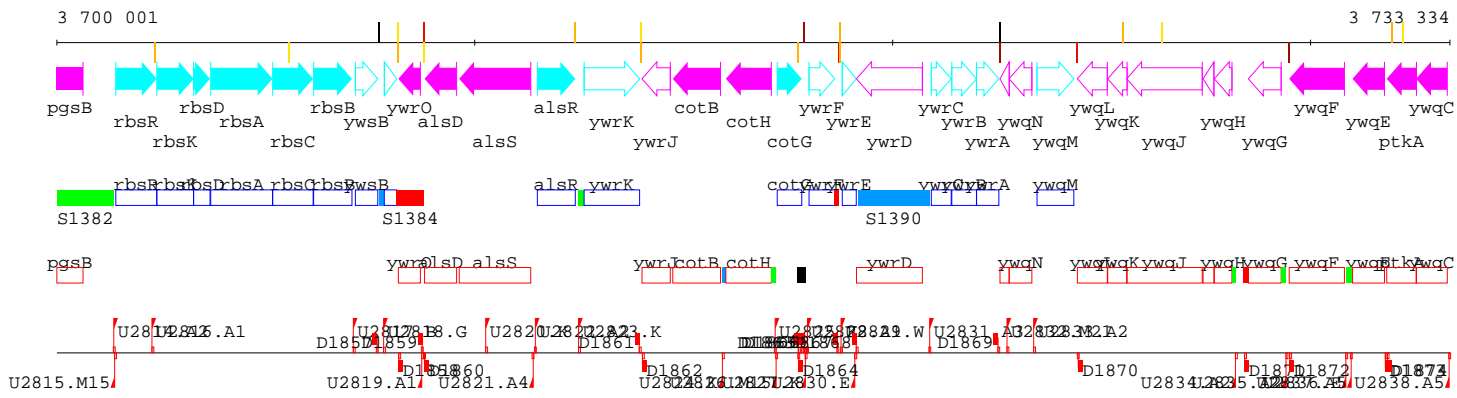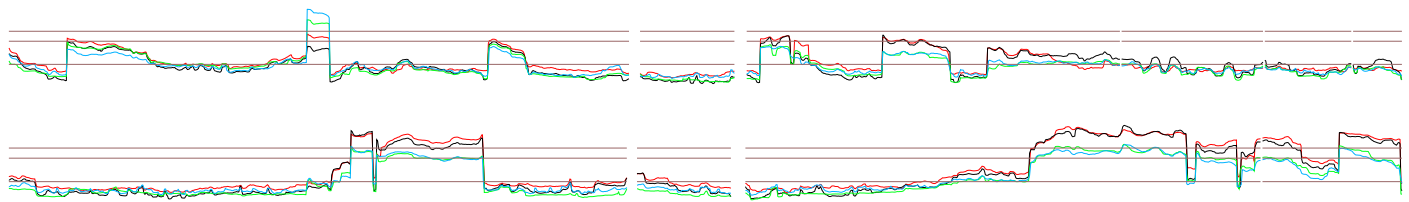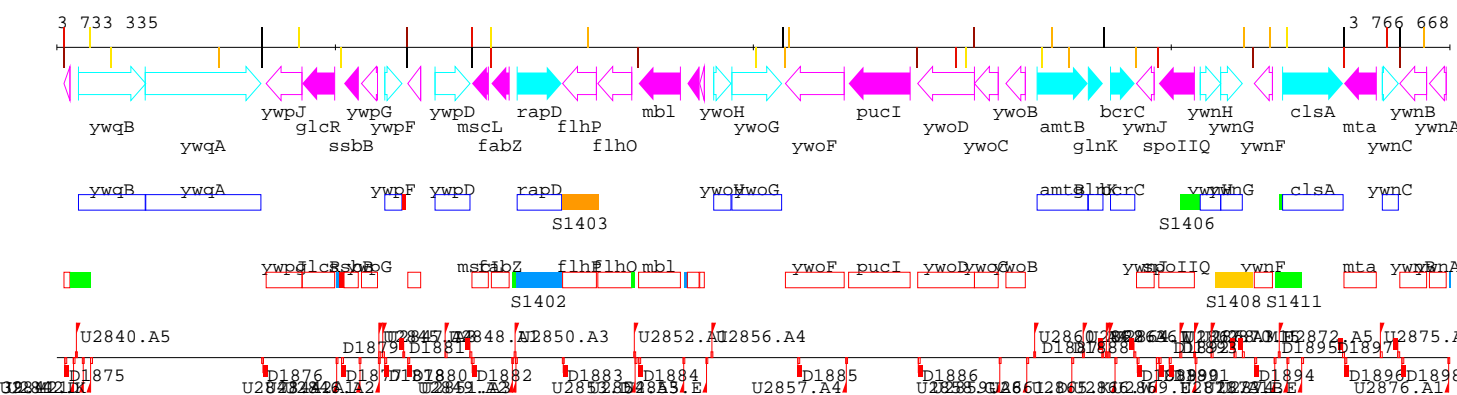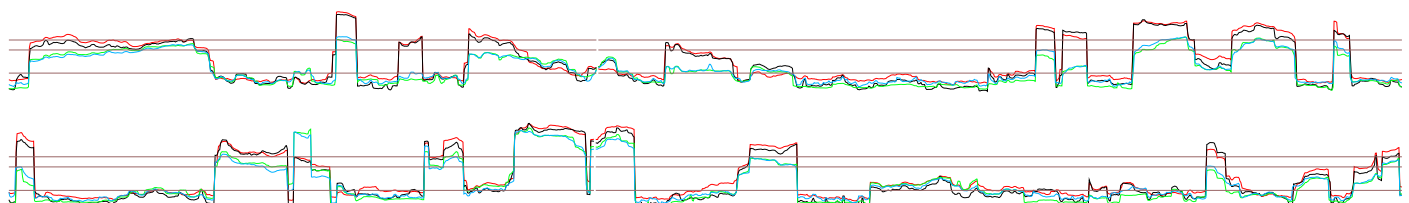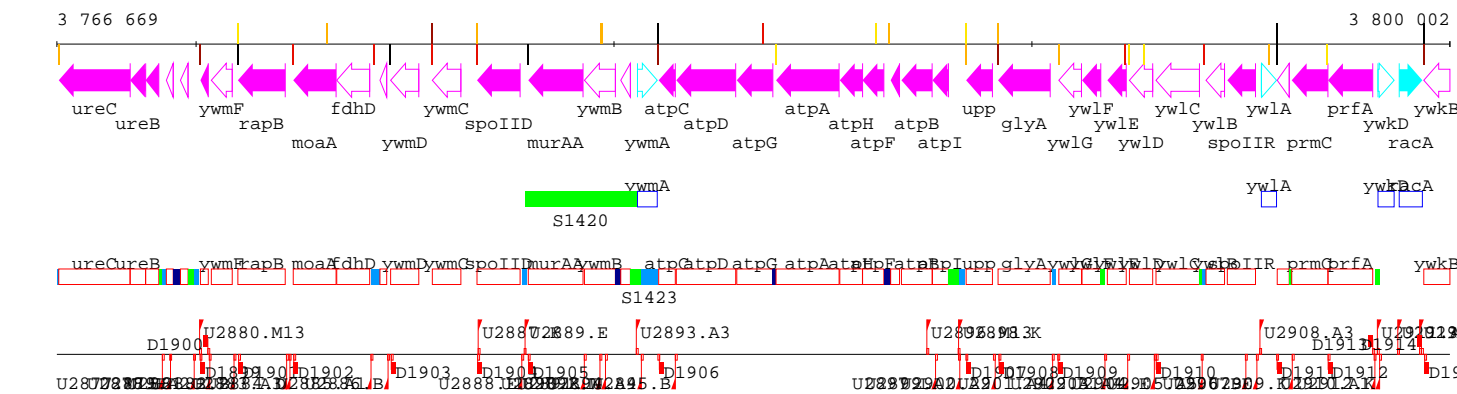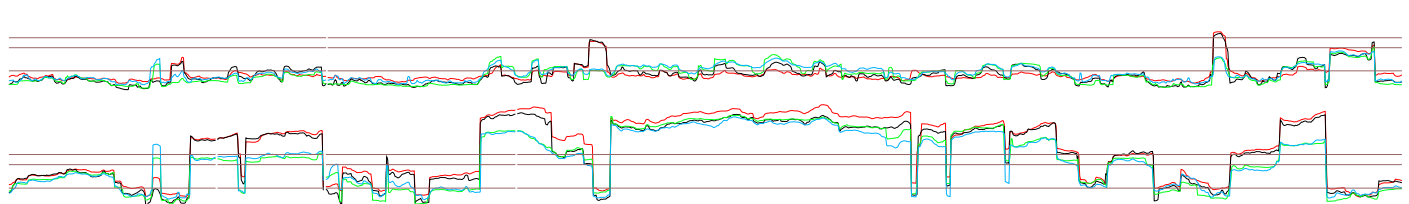

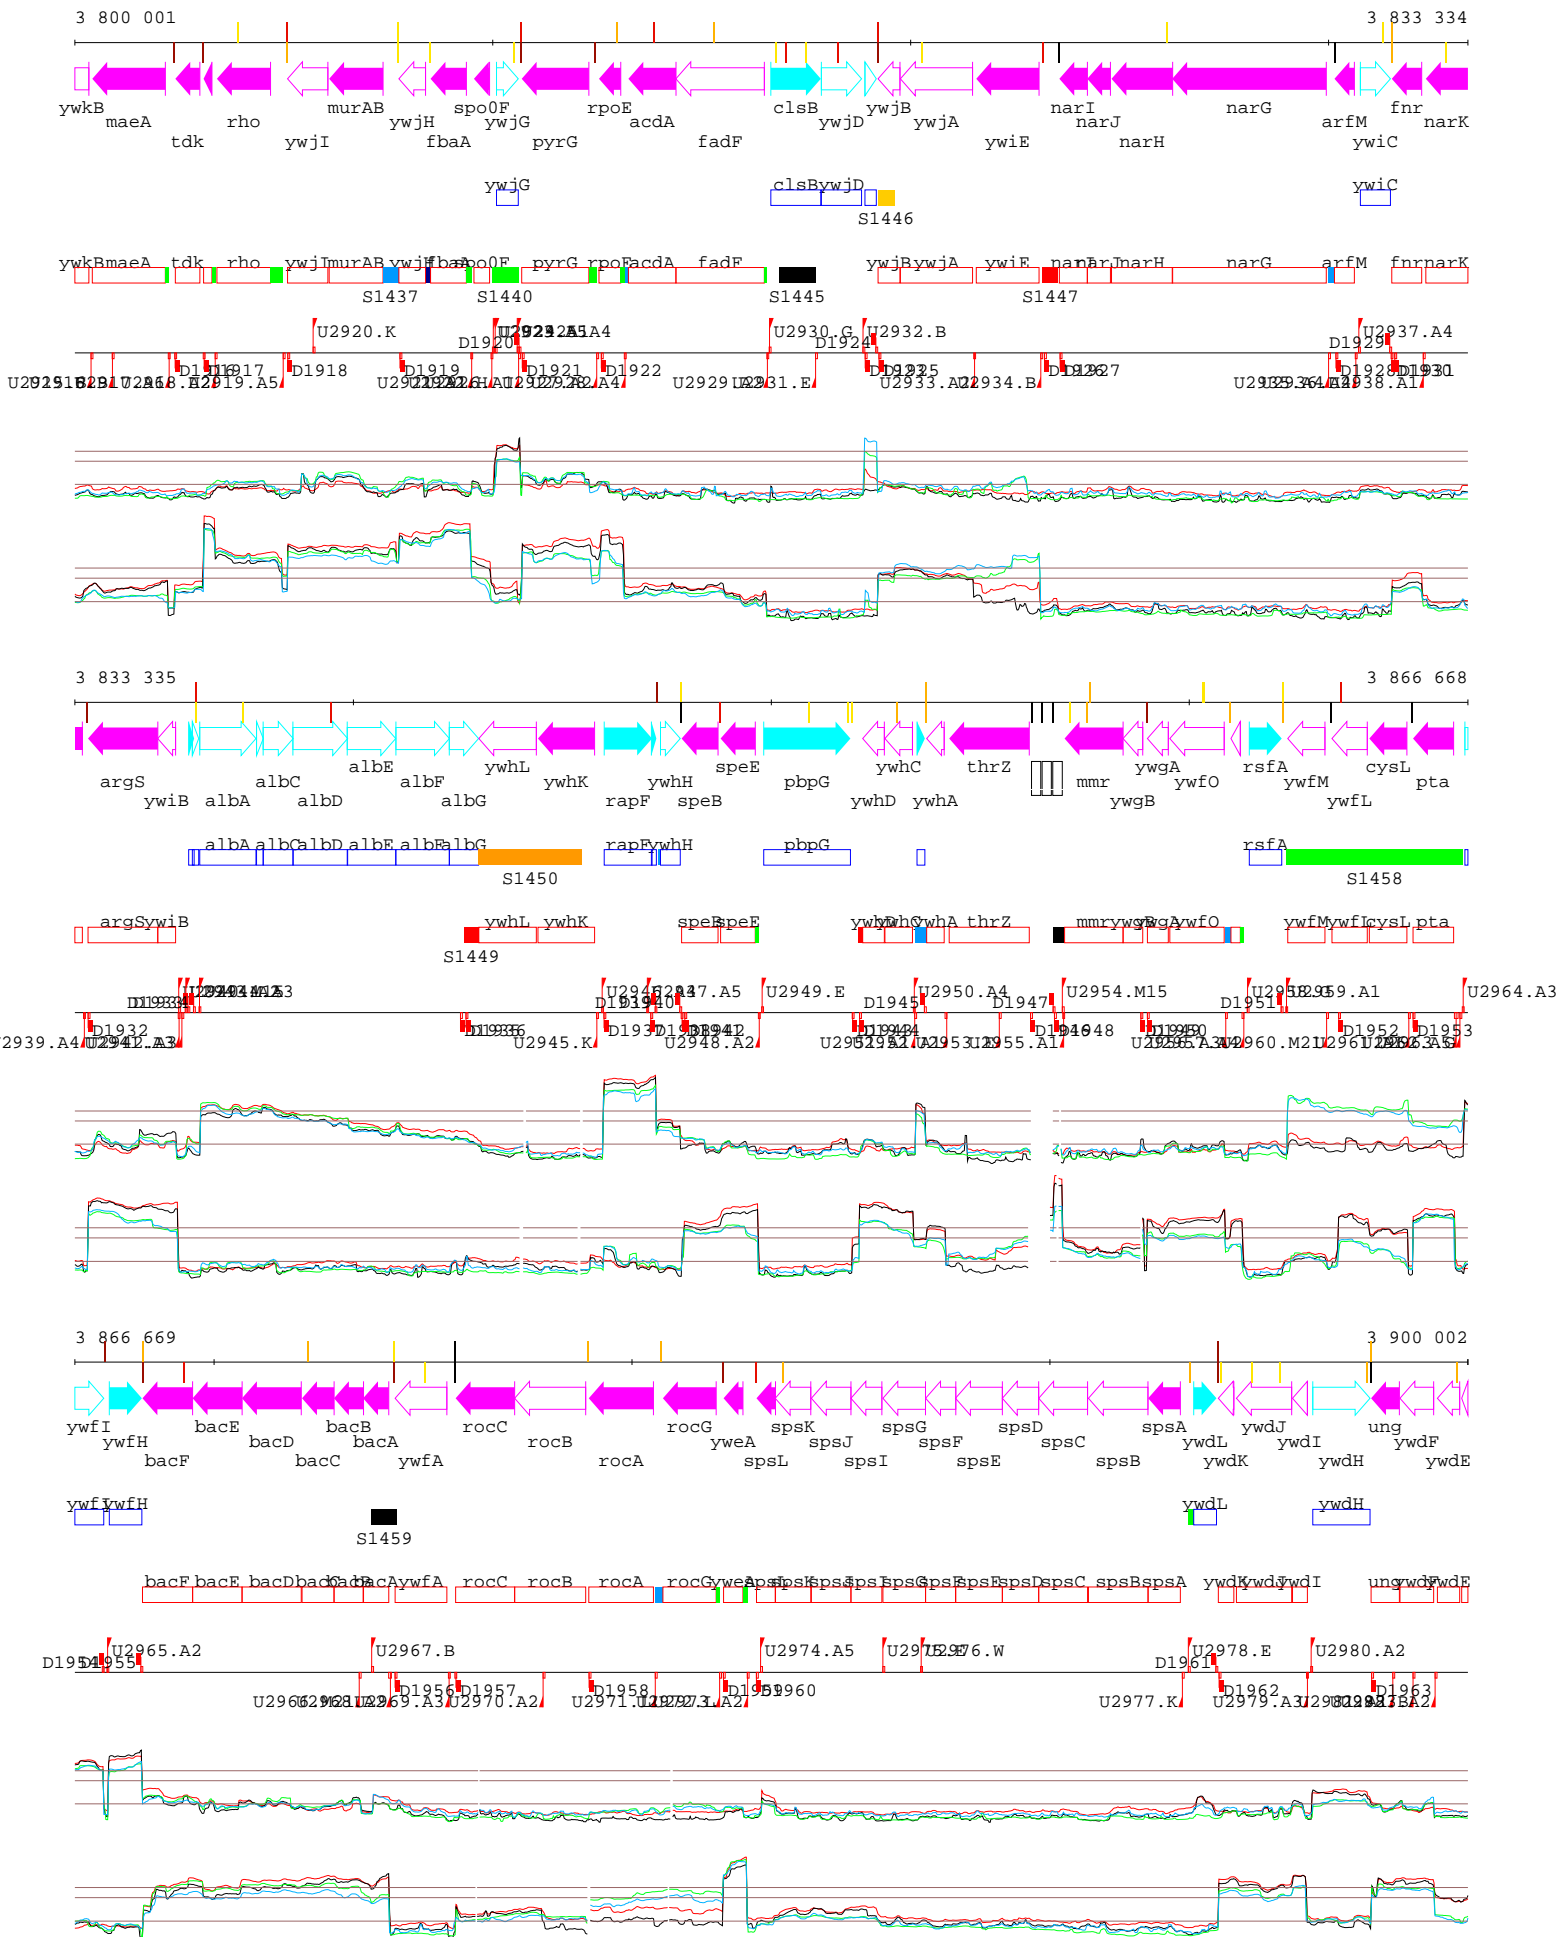

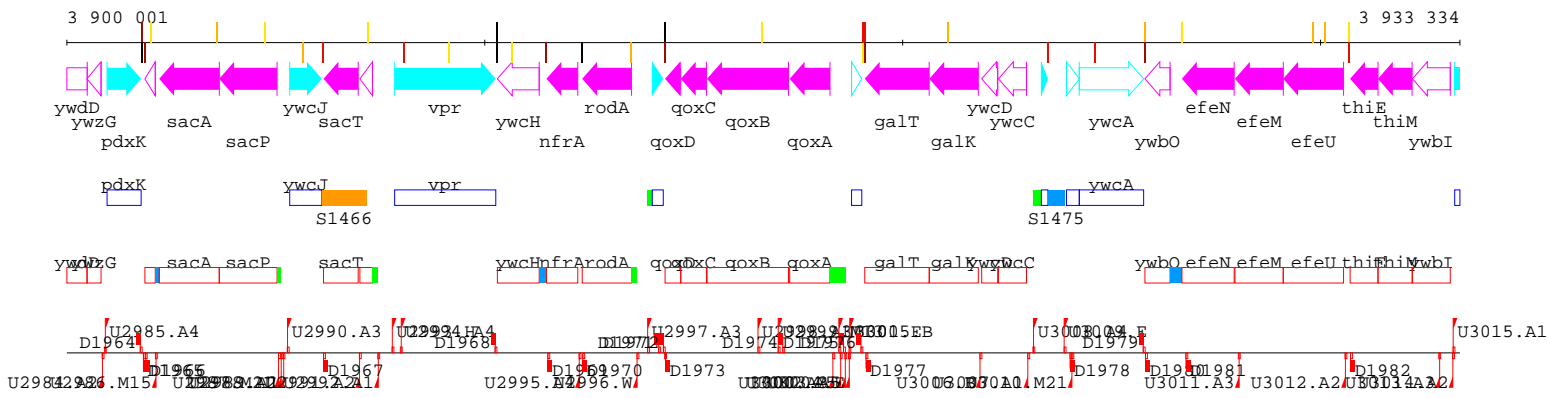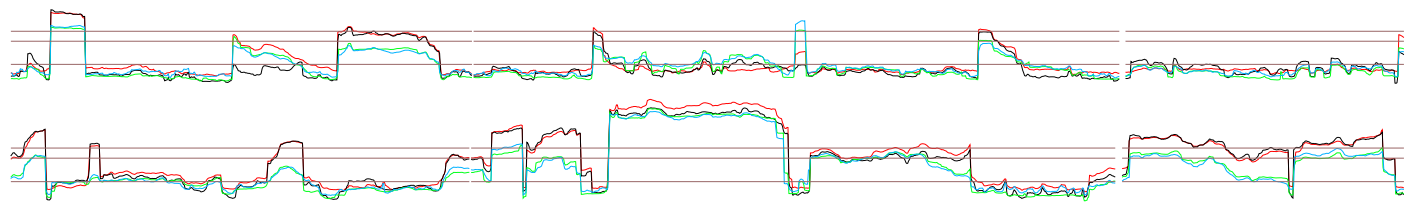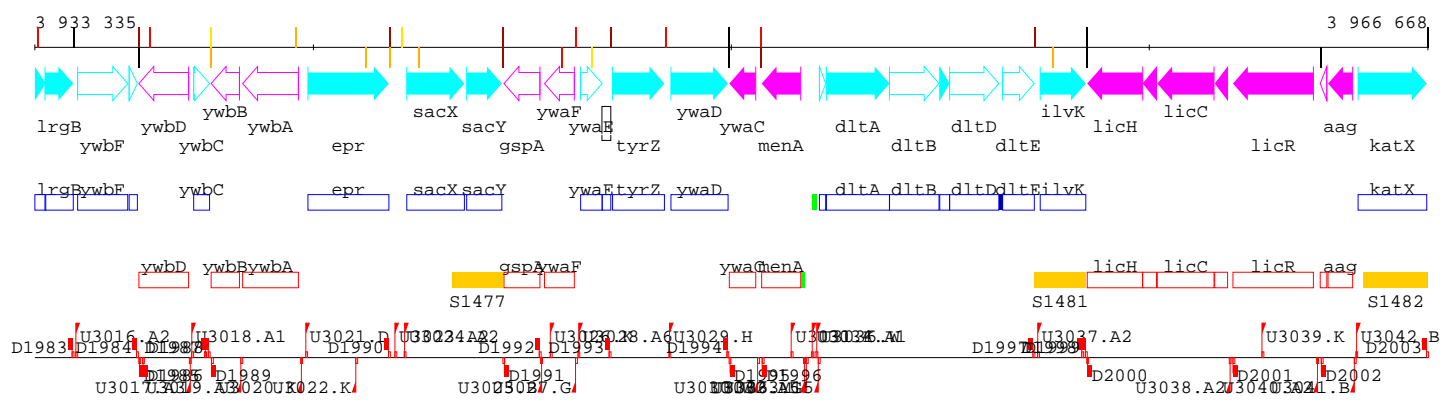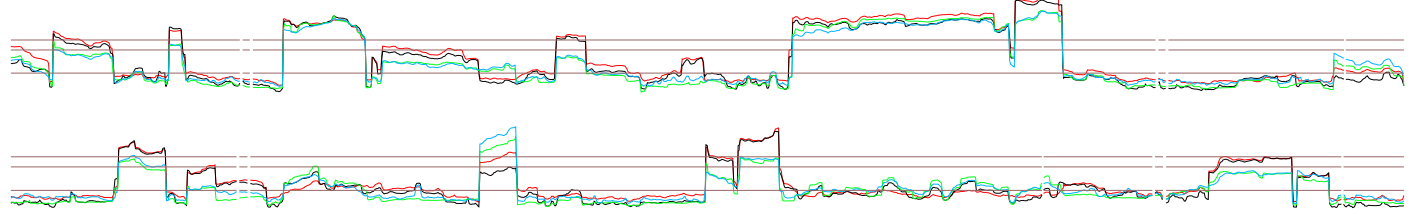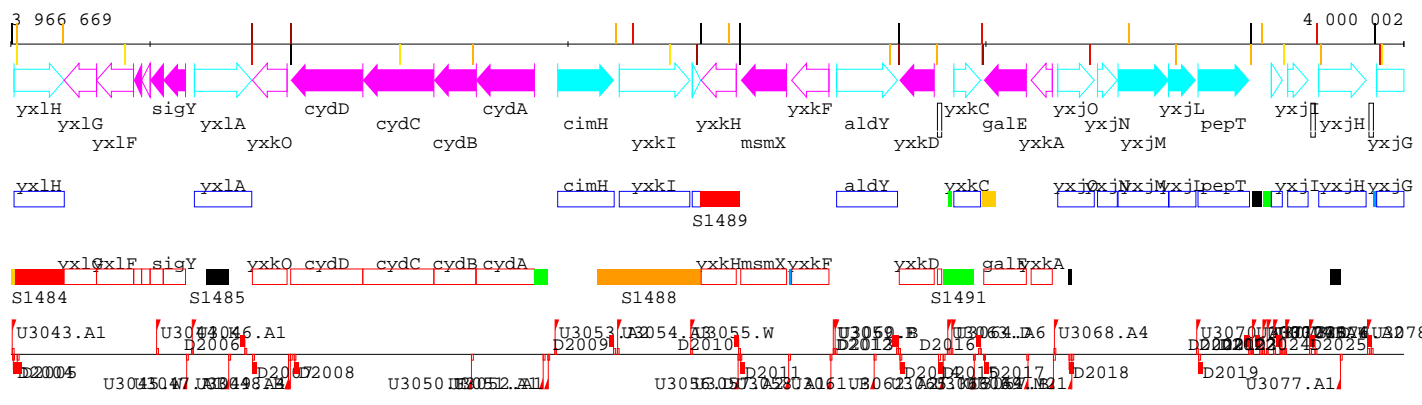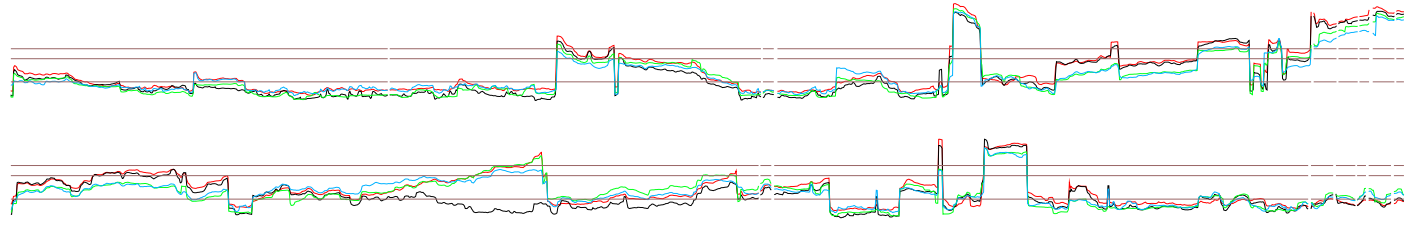



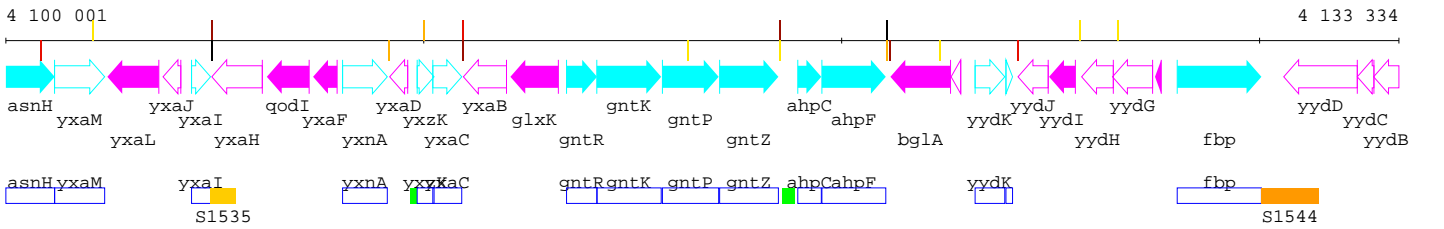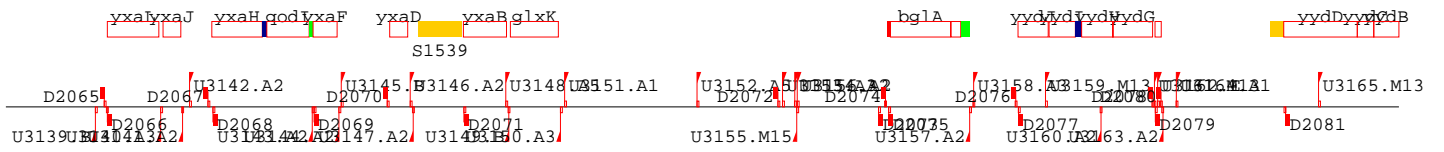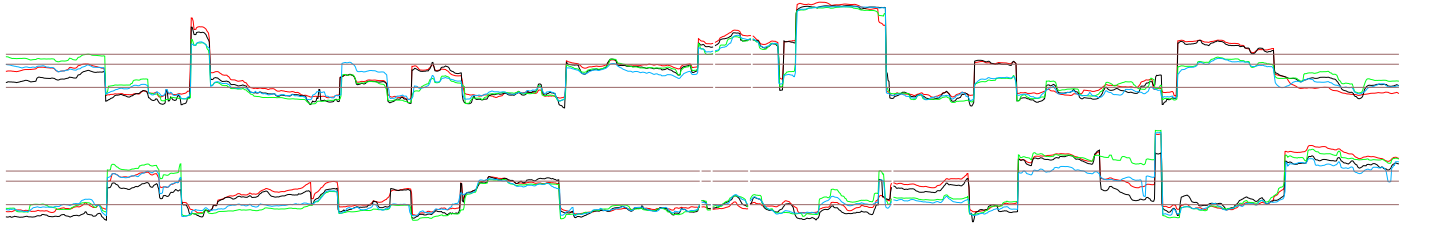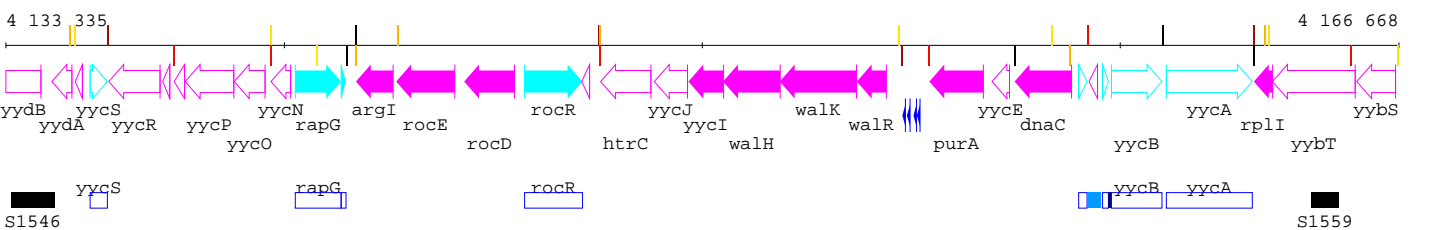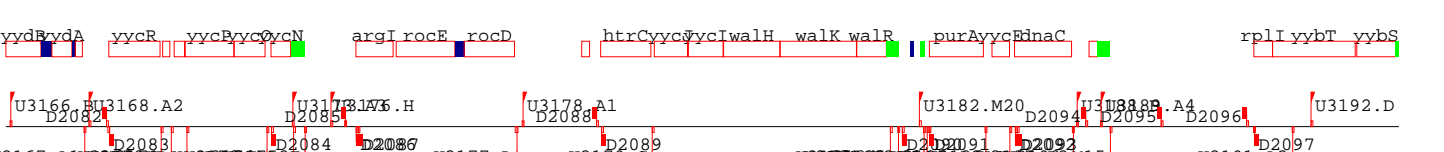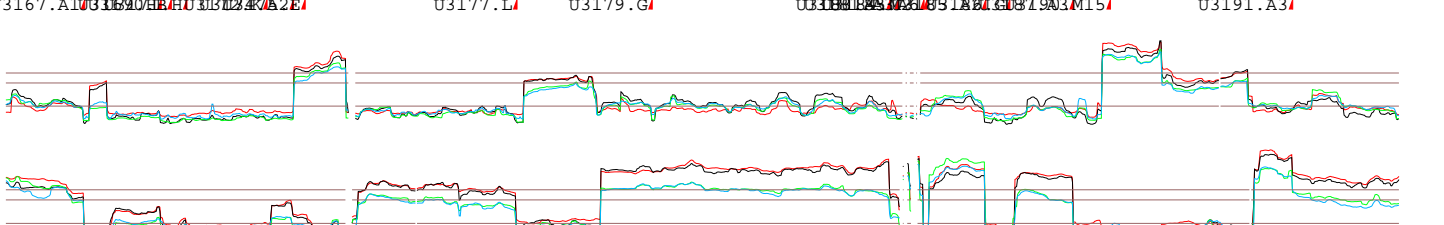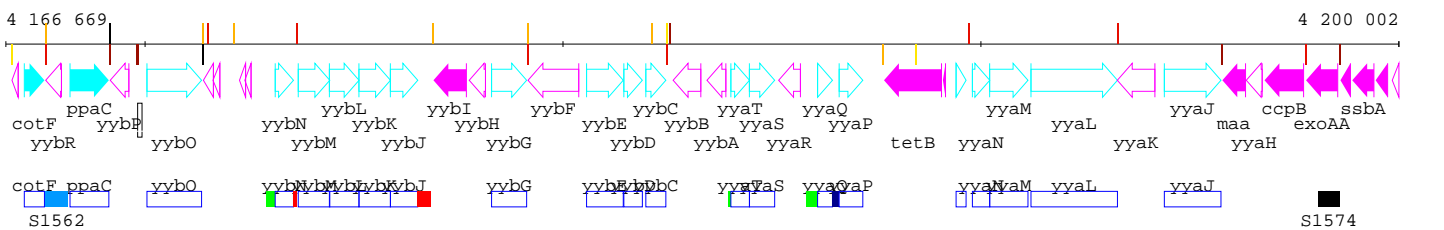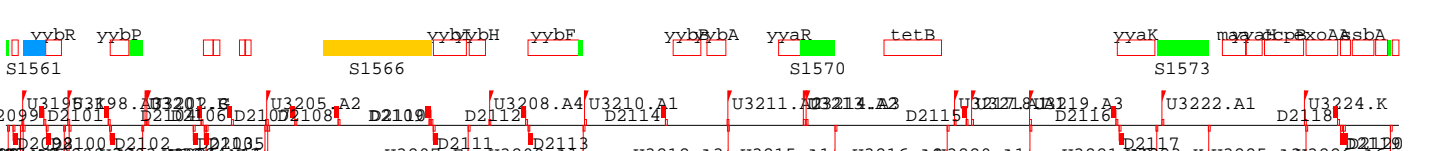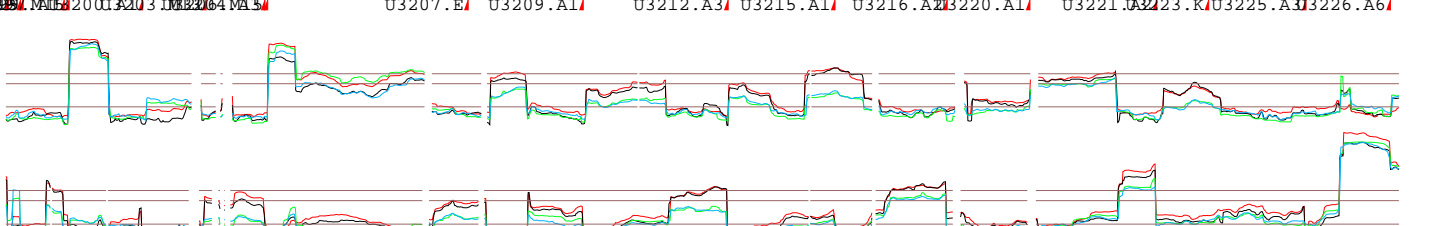

4 200 001

4 233 334

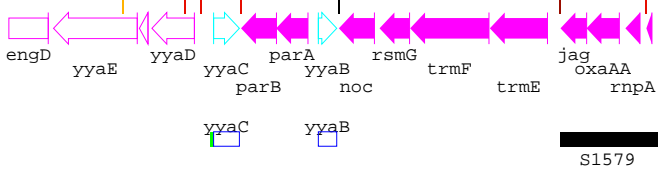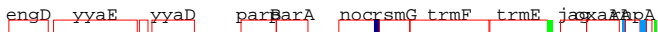

U3227.A2 U3229.A2 U3230.E U3232.A2 U3233.A3 U3234.A3 U3235.H U3236.A2 U3238.A1 U3241.M13 D2122 D2123 D2124 D2125 D2126

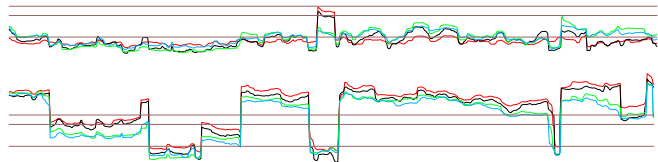

4 233 335

4 266 668

4 266 669

4 300 002
