# Supplementary material for: Bacillus subtilis RNase Y Activity In Vivo Analysed by Tiling Microarrays
Source: PubMed Central journal article supplement (PMC3542257; doi:10.1371/journal.pone.0054062), 2013-01-10

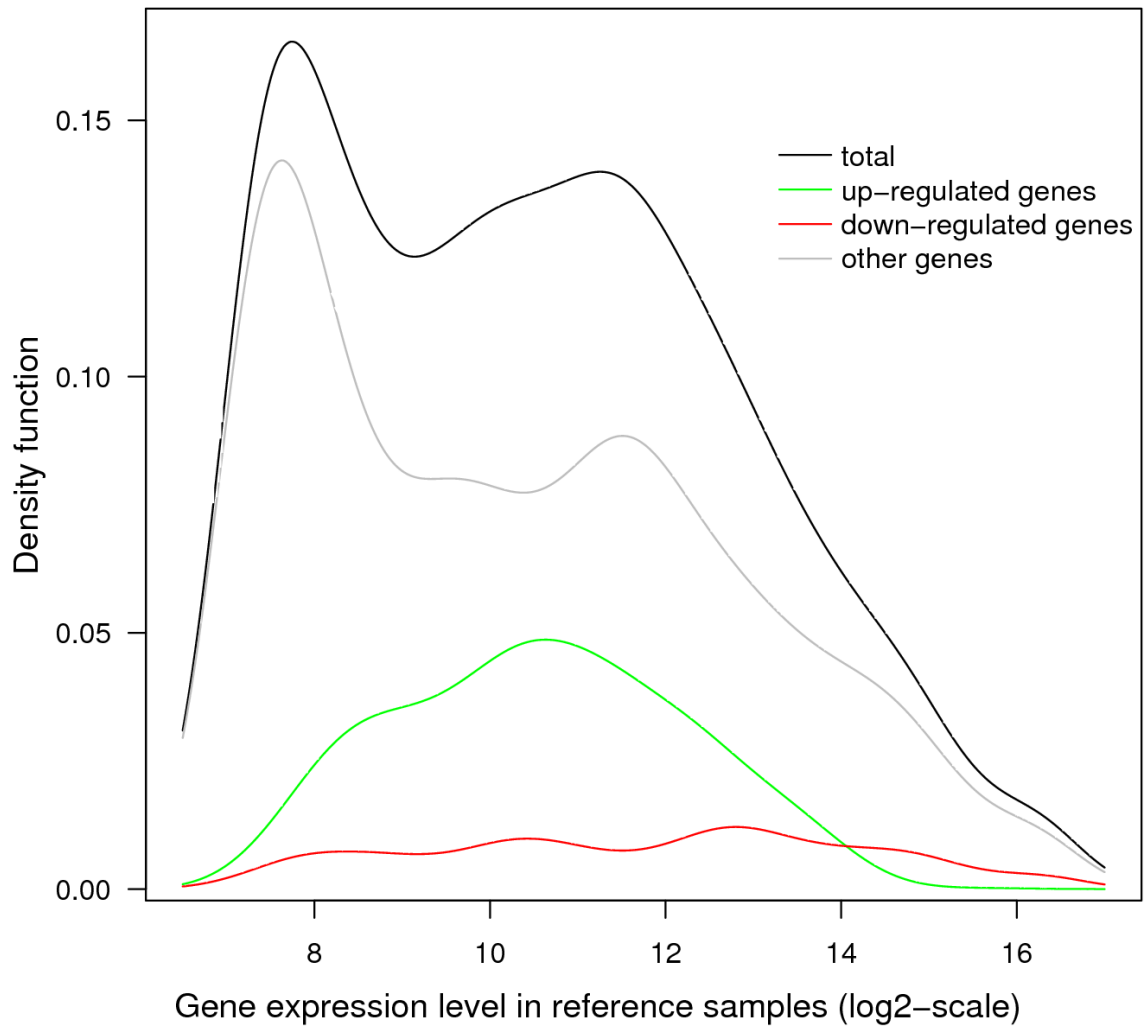

Supplement: pone.0054062.s002.pdf [file pone.0054062.s002.pdf]
